# Supplementary material for: Hippocampal DNA Methylation in a Mouse Model of Fetal Alcohol Spectrum Disorder That Includes Maternal Separation Stress Only Partially Explains Changes in Gene Expression
Source: Front Genet. 2020 Feb 27;11:70. doi: 10.3389/fgene.2020.00070 (PMC7056727; doi:10.3389/fgene.2020.00070)
Supplement: Supplementary Table 3 — Hypo- and hypermethylated promoter DMRs from adult hippocampus following prenatal alcohol exposure and postnatal maternal separation stress as compared to controls, filtered by significance (p < 0.01). [file Table_3.xlsx]

## Sheet: Ethanol+Stress (Hypo)
Column legend
GeneName	gene symbol for the DMR-associated gene
DMR_To_TSS	distance from middle position of DMR to transcription start site
DMR_Locus	genomic location of DMR
DMR_Length	bp length of DMR
Ethanol_Stress_Count	normalized tag counts in DMR for each Ethanol + Stress sample
Control_Count	normalized tag counts in DMR for each Control sample
log2FC	fold change (log2 transformed) of normalized tag counts between Ethanol + Stress and Control groups
p-value	p-value of the DMR
q-value	BH FDR-corrected p-value of the DMR
Genechrom	chromosome of DMR-associated gene
GeneTSS	transcription start site of DMR-associated gene
GeneTTS	transcription termination site of DMR-associated gene
Strand	transcriptional direction of DMR-associated gene
Accession	DMR-associated gene accession number
ProteinName	name of DMR-associated gene product
ProteinID	protein identifier of DMR-associated gene product
GeneName	DMR_To_TSS	DMR_Locus	DMR_Length	Ethanol_Stress_Count	Control_Count	log2FC	p-value	q-value	Genechrom	GeneTSS	GeneTTS	Strand	Accession	ProteinName	ProteinID
2610305D13Rik	-1002	chr4:147643021-147644000	979	16.81;10.26	81.53;13.86	-1.82	2.04363e-06	0.0371456	chr4	147642508	147611935	-	NM_145078	uncharacterized protein LOC112422	NP_659544
Gm21693	-571	chrY:3345401-3346400	999	1.77;9.12	26.80;23.38	-2.2	3.37196e-06	0.052142	chrY	3345329	3326745	-	NM_001270514	predicted gene, 21693	NP_001257443
Hsd3b4	1851	chr3:98454921-98455440	519	0.00;0.00	10.05;7.79	-inf	6.8727e-06	0.0804571	chr3	98457031	98445683	-	NM_001111336	3 beta-hydroxysteroid dehydrogenase type 4	NP_001104806
Gm4477	788	chr6:85706681-85707460	779	6.19;2.28	18.99;19.92	-2.2	7.86076e-06	0.0843961	chr6	85707858	85707172	-	NM_001253910	uncharacterized protein LOC100043497	NP_001240839
Ccdc85a	606	chr11:28583461-28583920	459	0.00;0.00	7.82;8.66	-inf	1.33598e-05	0.114998	chr11	28584296	28575196	-	NM_001166662	coiled-coil domain-containing protein 85A isoform 3	NP_001160134
Gm4307	1443	chr10:100341961-100342600	639	3.54;0.00	12.28;14.72	-2.93	2.03027e-05	0.14261	chr10	100340837	100341762	+	NM_001166641	uncharacterized protein LOC100043239	NP_001160113
Gm4305	1443	chr10:100341961-100342600	639	3.54;0.00	12.28;14.72	-2.93	2.03027e-05	0.14261	chr10	100340837	100341762	+	NM_001166639	uncharacterized protein LOC100043235	NP_001160111
Gm4303	1443	chr10:100341961-100342600	639	3.54;0.00	12.28;14.72	-2.93	2.03027e-05	0.14261	chr10	100340837	100341762	+	NM_001166638	uncharacterized protein LOC100043231	NP_001160110
Olfr367-ps	-550	chr2:37266141-37266660	519	1.77;2.28	13.40;12.99	-2.7	2.53222e-05	0.159484	chr2	37266950	37271387	+	NM_001081010	olfactory receptor 367, pseudogene precursor	NP_001074479
Vmn1r132	-1594	chr7:21610821-21611480	659	0.00;0.00	6.70;8.66	-inf	2.73663e-05	0.16064	chr7	21612744	21615146	+	NM_001122682	vomeronasal 1 receptor 132	NP_001116154
LOC100502924	267	chr4:73605681-73605940	259	0.00;0.00	11.17;6.06	-inf	4.24023e-05	0.19612	chr4	73605543	73611922	+	NM_001256481	uncharacterized protein LOC100502924	NP_001243410
Hnrnpul2	640	chr19:8819841-8820240	399	0.00;0.00	11.17;6.06	-inf	4.24023e-05	0.19612	chr19	8819400	8834142	+	NM_001081196	heterogeneous nuclear ribonucleoprotein U-like protein 2	NP_001074665
Gm21119	-196	chr8:20614161-20615300	1139	17.69;1.14	36.85;36.37	-1.96	6.14701e-05	0.230016	chr8	20614926	20640703	+	NM_001270553	ankyrin repeat domain-containing protein 7-like	NP_001257482
Dynlt1a	-686	chr17:6317861-6318460	599	0.00;0.00	13.40;3.46	-inf	7.25299e-05	0.251704	chr17	6317474	6306343	-	NM_001166629	dynein light chain Tctex-type 1A	NP_001160101
Mup13	286	chr4:61227761-61228240	479	0.00;0.00	8.93;6.06	-inf	7.48357e-05	0.251704	chr4	61228286	61224306	-	NM_001134674	major urinary protein 13 precursor	NP_001128146
Ptger1	1671	chr8:83668021-83668600	579	1.77;1.14	8.93;19.05	-3.27	8.38759e-05	0.261591	chr8	83666639	83670103	+	NM_013641	prostaglandin E2 receptor EP1 subtype	NP_038669
Gm3139	-1853	chr5:94524061-94524800	739	13.27;6.84	25.69;28.58	-1.43	0.00011338	0.281023	chr5	94526283	94538367	+	NM_001243938	uncharacterized protein LOC100041102	NP_001230867
Krtap5-3	177	chr7:142201101-142201980	879	2.65;6.84	14.52;25.98	-2.09	0.000116097	0.285076	chr7	142201363	142203015	+	NM_023860	keratin-associated protein 5-3	NP_076349
Gm4187	-325	chr7:20334021-20334760	739	0.88;1.14	8.93;10.39	-3.26	0.000126089	0.290472	chr7	20334065	20333141	-	NM_001167159	vomeronasal 1 receptor Vmn1r146	NP_001160631
Gm4133	-325	chr7:20334021-20334760	739	0.88;1.14	8.93;10.39	-3.26	0.000126089	0.290472	chr7	20334065	20333141	-	NM_001167158	vomernasal 1 receptor Vmn1r98	NP_001160630
Rabgap1	347	chr2:37452401-37452800	399	0.00;0.00	6.70;6.06	-inf	0.000210049	0.34244	chr2	37452253	37544962	+	NM_001033960	rab GTPase-activating protein 1 isoform b	NP_001029132
Zfp157	615	chr5:138441821-138442360	539	0.00;0.00	7.82;5.20	-inf	0.000252153	0.359591	chr5	138441475	138460694	+	NM_028130	zinc finger protein 157	NP_082406
Olfr1238	-1503	chr2:89408401-89408760	359	0.88;0.00	6.70;8.66	-4.12	0.000268022	0.36755	chr2	89407077	89406129	-	NM_146790	olfactory receptor 1238	NP_667001
Acvr1c	748	chr2:58356721-58357300	579	0.00;1.14	6.70;8.66	-3.75	0.000268022	0.36755	chr2	58357758	58267452	-	NM_001111030	activin receptor type-1C isoform 1 precursor	NP_001104500
Tmem151a	1047	chr19:5084241-5084620	379	0.00;0.00	3.35;10.39	-inf	0.000327808	0.401346	chr19	5085477	5079336	-	NM_001001885	transmembrane protein 151A	NP_001001885
Rbmy	1849	chrY:3304041-3305160	1119	27.42;29.63	42.44;74.48	-1.04	0.000342245	0.401346	chrY	3306449	3294971	-	NM_001166384	RNA-binding motif protein, Y chromosome, family 1 member A1	NP_001159856
Gm21708	1849	chrY:3304041-3305160	1119	27.42;29.63	42.44;74.48	-1.04	0.000342245	0.401346	chrY	3306449	3294971	-	NM_001270516	predicted gene, 21708	NP_001257445
Gm21704	1849	chrY:3304041-3305160	1119	27.42;29.63	42.44;74.48	-1.04	0.000342245	0.401346	chrY	3306449	3294971	-	NM_001270515	predicted gene, 21704	NP_001257444
Gm21693	1849	chrY:3304041-3305160	1119	27.42;29.63	42.44;74.48	-1.04	0.000342245	0.401346	chrY	3306449	3294971	-	NM_001270514	predicted gene, 21693	NP_001257443
Gm21677	1849	chrY:3304041-3305160	1119	27.42;29.63	42.44;74.48	-1.04	0.000342245	0.401346	chrY	3306449	3294971	-	NM_001270513	predicted gene, 21677	NP_001257442
Cml3	1560	chr6:85760621-85761220	599	0.88;2.28	10.05;9.53	-2.63	0.00034832	0.401346	chr6	85762480	85760630	-	NM_053097	probable N-acetyltransferase CML3 isoform 2	NP_444327
Apobec4	1320	chr1:152751661-152752080	419	0.00;0.00	4.47;7.79	-inf	0.000359787	0.401346	chr1	152750550	152757544	+	NM_001081197	putative C->U-editing enzyme APOBEC-4	NP_001074666
Gm20738	731	chrY:37958221-37958880	659	14.15;5.70	37.97;27.71	-1.73	0.000403604	0.401346	chrY	37957819	37960138	+	NM_207162	Ssty1 family member	NP_997045
Katnb1	-30	chr8:95080781-95081560	779	3.54;2.28	11.17;17.32	-2.29	0.000417183	0.401346	chr8	95081200	95099874	+	NM_028805	katanin p80 WD40 repeat-containing subunit B1	NP_083081
Lsp1	-22	chr7:142471461-142472180	719	9.73;5.70	18.99;25.11	-1.52	0.000428569	0.401346	chr7	142471842	142494868	+	NM_019391	lymphocyte-specific protein 1 isoform 2	NP_062264
Olfr267	-860	chr4:58786401-58786760	359	0.00;0.00	5.58;6.06	-inf	0.000434835	0.401346	chr4	58785720	58784778	-	NM_146920	olfactory receptor 267	NP_667131
Gm8898	-1922	chr2:175705341-175705900	559	0.00;0.00	6.70;5.20	-inf	0.000434835	0.401346	chr2	175703698	175690880	-	NM_001177407	KRAB box and zinc finger C2H2 type domain containing protein isoform 1	NP_001170878
Gm14431	-1922	chr2:175705341-175705900	559	0.00;0.00	6.70;5.20	-inf	0.000434835	0.401346	chr2	175703698	175690880	-	NM_001177406	KRAB box and zinc finger C2H2 type domain containing protein isoform 1	NP_001170877
Gm6370	-1532	chr5:146489481-146490180	699	5.31;4.56	17.87;14.72	-1.72	0.000497951	0.43426	chr5	146491362	146494132	+	NM_001243110	predicted gene 6370	NP_001230039
Gm9839	949	chr1:32519861-32520240	379	0.00;0.00	4.47;6.93	-inf	0.000527762	0.446749	chr1	32520999	32519562	-	NM_001199956	sentrin 15	NP_001186885
Sh3bp2	816	chr5:34543801-34544560	759	2.65;1.14	12.28;9.53	-2.52	0.000533619	0.446749	chr5	34543364	34563639	+	NM_001145858	SH3 domain-binding protein 2 isoform c	NP_001139330
Lim2	-1140	chr7:43428701-43429220	519	4.42;1.14	11.17;13.86	-2.17	0.000542917	0.446749	chr7	43430100	43435991	+	NM_177693	lens fiber membrane intrinsic protein	NP_808361
Lpp	921	chr16:24393981-24394560	579	3.54;2.28	16.75;11.26	-2.27	0.000551784	0.446749	chr16	24393349	24992578	+	NM_178665	lipoma-preferred partner homolog isoform 1	NP_848780
Tmem254c	-298	chr14:25927781-25928160	379	1.77;0.00	8.93;7.79	-3.24	0.000566602	0.446749	chr14	25927672	25923997	-	NM_001270498	predicted gene 10395 isoform 1	NP_001257427
Tmem254a	-298	chr14:25927781-25928160	379	1.77;0.00	8.93;7.79	-3.24	0.000566602	0.446749	chr14	25927672	25923297	-	NM_026679	transmembrane protein 254 isoform 1	NP_080955
Gm13247	-669	chr4:146513781-146514720	939	4.42;3.42	12.28;17.32	-1.92	0.000594321	0.458315	chr4	146514919	146539395	+	NM_001243139	uncharacterized protein LOC100041433	NP_001230068
Tmed4	-1193	chr11:6275601-6276460	859	1.77;2.28	11.17;9.53	-2.35	0.000657894	0.46066	chr11	6274837	6270713	-	NM_134020	transmembrane emp24 domain-containing protein 4 precursor	NP_598781
Fgf22	-558	chr10:79754321-79754800	479	1.77;2.28	11.17;9.53	-2.35	0.000657894	0.46066	chr10	79755118	79756961	+	NM_023304	fibroblast growth factor 22 precursor	NP_075793
Tpd52l1	1891	chr10:31443741-31444320	579	0.00;1.14	8.93;6.06	-3.72	0.000777191	0.46066	chr10	31445921	31332379	-	NM_009413	tumor protein D53	NP_033439
Supt16	-991	chr14:52198041-52198420	379	0.00;0.00	4.47;6.06	-inf	0.000830828	0.46066	chr14	52197239	52160418	-	NM_033618	FACT complex subunit SPT16	NP_291096
Phf21b	-721	chr15:84856681-84857020	339	0.00;0.00	4.47;6.06	-inf	0.000830828	0.46066	chr15	84856129	84785375	-	NM_001081166	PHD finger protein 21B	NP_001074635
Olfr816	-154	chr10:129912221-129912640	419	0.00;0.00	4.47;6.06	-inf	0.000830828	0.46066	chr10	129912276	129911337	-	NM_146672	olfactory receptor 816	NP_666883
Kifc1	603	chr17:33889801-33890260	459	0.00;0.00	4.47;6.06	-inf	0.000830828	0.46066	chr17	33890633	33875665	-	NM_001195298	kinesin-like protein KIFC1	NP_001182227
Ndn	494	chr7:62348521-62349020	499	0.00;0.00	5.58;5.20	-inf	0.000830829	0.46066	chr7	62348276	62349927	+	NM_010882	necdin	NP_035012
Igsf5	-1756	chr16:96359801-96360200	399	0.00;0.00	5.58;5.20	-inf	0.000830829	0.46066	chr16	96361756	96404030	+	NM_001177887	immunoglobulin superfamily member 5 isoform 2 precursor	NP_001171358
Gm4307	439	chr10:100346281-100346540	259	0.00;0.00	5.58;5.20	-inf	0.000830829	0.46066	chr10	100345971	100346881	+	NM_001166641	uncharacterized protein LOC100043239	NP_001160113
Gm4305	439	chr10:100346281-100346540	259	0.00;0.00	5.58;5.20	-inf	0.000830829	0.46066	chr10	100345971	100346881	+	NM_001166639	uncharacterized protein LOC100043235	NP_001160111
Gm4303	439	chr10:100346281-100346540	259	0.00;0.00	5.58;5.20	-inf	0.000830829	0.46066	chr10	100345971	100346881	+	NM_001166638	uncharacterized protein LOC100043231	NP_001160110
Acsm1	-177	chr7:119617321-119617980	659	2.65;0.00	8.93;9.53	-2.8	0.00084672	0.46066	chr7	119617827	119662515	+	NM_054094	acyl-coenzyme A synthetase ACSM1, mitochondrial	NP_473435
Prr15l	-1013	chr11:96928101-96928520	419	0.00;0.00	6.70;4.33	-inf	0.000888257	0.468812	chr11	96929323	96935647	+	NM_146026	proline-rich protein 15-like protein	NP_666138
Arpc1b	1145	chr5:145115201-145115600	399	0.00;0.00	6.70;4.33	-inf	0.000888257	0.468812	chr5	145114255	145128186	+	NM_023142	actin-related protein 2/3 complex subunit 1B	NP_075631
Arhgef1	605	chr7:24904641-24905260	619	0.00;0.00	6.70;4.33	-inf	0.000888257	0.468812	chr7	24904345	24926591	+	NM_001130152	rho guanine nucleotide exchange factor 1 isoform c	NP_001123624
Adamts19	-1843	chr18:58834721-58835120	399	0.00;1.14	4.47;10.39	-3.7	0.000908478	0.469768	chr18	58836763	59053678	+	NM_175506	A disintegrin and metalloproteinase with thrombospondin motifs 19 precursor	NP_780715
Izumo1	-1760	chr7:45619721-45620380	659	5.31;6.84	14.52;19.05	-1.47	0.000913657	0.469768	chr7	45621810	45627242	+	NM_001018013	izumo sperm-egg fusion protein 1 precursor	NP_001018013
Ogfod2	1143	chr5:124113321-124113640	319	0.00;0.00	2.23;9.53	-inf	0.000932037	0.469768	chr5	124112337	124115476	+	NM_025671	2-oxoglutarate and iron-dependent oxygenase domain-containing protein 2	NP_079947
Kcnk12	1344	chr17:87796481-87796820	339	0.00;1.14	5.58;7.79	-3.55	0.000933401	0.469768	chr17	87797994	87745820	-	NM_199251	potassium channel subfamily K member 12	NP_954859
Prss58	1407	chr6:40898741-40899220	479	0.00;1.14	6.70;6.93	-3.58	0.000933401	0.469768	chr6	40900387	40895261	-	NM_175020	putative inactive serine protease 58 precursor	NP_778185
2610305D13Rik	-1862	chr4:147644121-147644620	499	1.77;0.00	12.28;6.93	-3.44	0.000935703	0.470187	chr4	147642508	147611935	-	NM_145078	uncharacterized protein LOC112422	NP_659544
Mrgbp	1987	chr2:180583101-180583480	379	0.00;0.00	8.93;2.60	-inf	0.00101509	0.495027	chr2	180581303	180585634	+	NM_028479	MRG-binding protein	NP_082755
Ulk4	1412	chr9:121275461-121276060	599	2.65;0.00	10.05;7.79	-2.75	0.00105555	0.505039	chr9	121277172	120964453	-	NM_177589	serine/threonine-protein kinase ULK4	NP_808257
Sympk	674	chr7:19024861-19025240	379	0.00;0.00	3.35;7.79	-inf	0.0010686	0.506458	chr7	19024376	19054622	+	NM_026605	symplekin	NP_080881
9530053A07Rik	-45	chr7:28129241-28129600	359	0.00;0.00	3.35;7.79	-inf	0.0010686	0.506458	chr7	28129465	28164811	+	NM_001164655	Fc fragment of IgG binding protein-like precursor	NP_001158127
Nhlh1	1036	chr1:172056201-172056920	719	5.31;4.56	13.40;16.45	-1.6	0.00118126	0.509604	chr1	172057596	172052291	-	NM_010916	helix-loop-helix protein 1	NP_035046
Vmn1r111	-260	chr7:21546001-21546700	699	3.54;6.84	15.64;14.72	-1.55	0.00118126	0.509604	chr7	21546090	21545169	-	NM_001166746	vomeronasal 1 receptor 111	NP_001160218
Gm4220	-260	chr7:21546001-21546700	699	3.54;6.84	15.64;14.72	-1.55	0.00118126	0.509604	chr7	21546090	21545169	-	NM_001167168	vomeronasal 1 receptor Vmn1r166	NP_001160640
Gm4179	-260	chr7:21546001-21546700	699	3.54;6.84	15.64;14.72	-1.55	0.00118126	0.509604	chr7	21546090	21545169	-	NM_001167169	vomernasal 1 receptor Vmn1r138	NP_001160641
Gm4172	-260	chr7:21546001-21546700	699	3.54;6.84	15.64;14.72	-1.55	0.00118126	0.509604	chr7	21546090	21545169	-	NM_001166839	vomernasal 1 receptor Vmn1r131	NP_001160311
Atp10a	-1091	chr7:58656921-58657300	379	0.00;1.14	11.17;3.46	-3.68	0.00122518	0.509604	chr7	58658201	58829426	+	NM_009728	probable phospholipid-transporting ATPase VA	NP_033858
Ttf1	1728	chr2:29061781-29062200	419	0.00;1.14	8.93;5.20	-3.63	0.00126064	0.509604	chr2	29060262	29087650	+	NM_009442	transcription termination factor 1	NP_033468
Prkar1b	296	chr5:139129921-139130260	339	0.88;4.56	20.10;4.33	-2.17	0.00131578	0.509604	chr5	139130386	139017303	-	NM_001253890	cAMP-dependent protein kinase type I-beta regulatory subunit	NP_001240819
9230112D13Rik	-129	chr14:34522741-34523120	379	1.77;0.00	6.70;8.66	-3.12	0.00133104	0.509604	chr14	34522801	34511620	-	NM_030062	uncharacterized protein LOC78243	NP_084338
Calml4	1707	chr9:62859581-62860040	459	0.00;2.28	6.70;8.66	-2.75	0.00133104	0.509604	chr9	62858103	62875917	+	NM_001102468	calmodulin-like protein 4 isoform b	NP_001095938
4930449I24Rik	322	chr5:146502461-146502980	519	0.88;2.28	14.52;6.06	-2.7	0.00139433	0.509604	chr5	146502398	146505183	+	NM_026136	uncharacterized protein LOC67410	NP_080412
Zfp558	-1041	chr9:18474181-18475020	839	0.88;5.70	13.40;12.12	-1.96	0.00142826	0.509604	chr9	18473559	18454053	-	NM_028935	zinc finger protein 558	NP_083211
Txnrd3	303	chr6:89644101-89644480	379	0.00;0.00	3.35;6.93	-inf	0.00143968	0.509604	chr6	89643987	89675529	+	NM_001178060	thioredoxin reductase 3 isoform 4	NP_001171531
Scube3	-555	chr17:28141781-28142160	379	0.00;0.00	3.35;6.93	-inf	0.00143968	0.509604	chr17	28142525	28171345	+	NM_001004366	signal peptide, CUB and EGF-like domain-containing protein 3 precursor	NP_001004366
Olfr312	-1225	chr11:58829701-58830160	459	2.65;1.14	11.17;8.66	-2.39	0.00151978	0.509604	chr11	58831155	58832082	+	NM_001011819	olfactory receptor 312	NP_001011819
Rlbp1	667	chr7:79386121-79386600	479	1.77;2.28	10.05;9.53	-2.27	0.00151978	0.509604	chr7	79387027	79374870	-	NM_020599	retinaldehyde-binding protein 1	NP_065624
Gm1604b	-1662	chr17:8102581-8103200	619	1.77;2.28	7.82;11.26	-2.24	0.00165299	0.527078	chr17	8101228	8038509	-	NM_001033442	uncharacterized protein LOC381059	NP_001028614
Tesk1	94	chr4:43442201-43442540	339	0.00;0.00	4.47;5.20	-inf	0.0017312	0.527078	chr4	43442276	43448075	+	NM_011571	dual specificity testis-specific protein kinase 1	NP_035701
Pin1-ps1	1830	chr2:104714221-104714700	479	0.00;0.00	4.47;5.20	-inf	0.0017312	0.527078	chr2	104716290	104713925	-	NM_001033768	peptidylprolyl cis/trans isomerase, NIMA-interacting 1	NP_001028940
Lingo2	-747	chr4:36719521-36719900	379	0.00;0.00	4.47;5.20	-inf	0.0017312	0.527078	chr4	36718963	35706647	-	NM_001166000	leucine-rich repeat and immunoglobulin-like domain-containing nogo receptor-interacting protein 2 precursor	NP_001159472
Exoc6	1883	chr19:37552101-37552500	399	0.00;0.00	4.47;5.20	-inf	0.0017312	0.527078	chr19	37550417	37683249	+	NM_175353	exocyst complex component 6	NP_780562
C1galt1c1	-1587	chrX:38636541-38636920	379	0.00;0.00	4.47;5.20	-inf	0.0017312	0.527078	chrX	38635143	38630782	-	NM_021550	C1GALT1-specific chaperone 1	NP_067525
Yipf3	1261	chr17:46249161-46249520	359	0.00;0.00	5.58;4.33	-inf	0.0017312	0.527078	chr17	46248079	46252537	+	NM_145353	protein YIPF3	NP_663328
Stk31	1857	chr6:49397261-49397660	399	0.00;0.00	5.58;4.33	-inf	0.0017312	0.527078	chr6	49395603	49469502	+	NM_029916	serine/threonine-protein kinase 31	NP_084192
Qrfpr	715	chr3:36221381-36221740	359	0.00;0.00	5.58;4.33	-inf	0.0017312	0.527078	chr3	36222275	36179425	-	NM_198192	pyroglutamylated RFamide peptide receptor	NP_937835
Plaur	-1929	chr7:24460381-24460760	379	0.00;0.00	5.58;4.33	-inf	0.0017312	0.527078	chr7	24462499	24475873	+	NM_011113	urokinase plasminogen activator surface receptor precursor	NP_035243
Pfkfb4	39	chr9:108991721-108992160	439	0.00;0.00	5.58;4.33	-inf	0.0017312	0.527078	chr9	108991901	109032225	+	NM_173019	6-phosphofructo-2-kinase/fructose-2, 6-bisphosphatase 4	NP_766607
Ahcyl1	-1212	chr3:107697621-107697900	279	0.00;0.00	5.58;4.33	-inf	0.0017312	0.527078	chr3	107696548	107663119	-	NM_145542	putative adenosylhomocysteinase 2	NP_663517
Afap1l2	1925	chr19:57006461-57006840	379	0.00;0.00	5.58;4.33	-inf	0.0017312	0.527078	chr19	57008575	56912353	-	NM_146102	actin filament-associated protein 1-like 2 isoform 3	NP_666214
Abcc8	-547	chr7:46180141-46181020	879	4.42;3.42	11.17;17.32	-1.86	0.00175423	0.527078	chr7	46180033	46104522	-	NM_011510	ATP-binding cassette, sub-family C (CFTR/MRP), member 8	NP_035640
Vmn1r95	1871	chr7:20195381-20195780	399	0.00;0.00	6.70;3.46	-inf	0.00177959	0.527078	chr7	20193709	20194633	+	NM_001167538	vomeronasal 1 receptor, 95	NP_001161010
Vmn1r143	1871	chr7:20195381-20195780	399	0.00;0.00	6.70;3.46	-inf	0.00177959	0.527078	chr7	20193709	20194633	+	NM_001166750	vomeronasal 1 receptor 143	NP_001160222
Syndig1	1488	chr2:149832081-149832460	379	0.00;0.00	6.70;3.46	-inf	0.00177959	0.527078	chr2	149830782	150004392	+	NM_001085521	synapse differentiation-inducing gene protein 1	NP_001078990
Krt4	-665	chr15:101925181-101925620	439	0.00;0.00	6.70;3.46	-inf	0.00177959	0.527078	chr15	101924735	101918534	-	NM_008475	keratin, type II cytoskeletal 4	NP_032501
Fbxw18	-560	chr9:109703101-109703420	319	0.00;0.00	6.70;3.46	-inf	0.00177959	0.527078	chr9	109702700	109676733	-	NM_001033794	F-box and WD-40 domain protein 18	NP_001028966
Aqp4	674	chr18:15402821-15403200	379	0.00;0.00	6.70;3.46	-inf	0.00177959	0.527078	chr18	15403684	15389393	-	NM_009700	aquaporin-4	NP_033830
9030025P20Rik	697	chr17:14979421-14979700	279	0.00;0.00	6.70;3.46	-inf	0.00177959	0.527078	chr17	14978863	14991577	+	NM_001123370	uncharacterized protein LOC100041574	NP_001116842
Pla2g4e	-1095	chr2:120246241-120246620	379	0.00;0.00	3.35;6.06	-inf	0.0018094	0.527078	chr2	120245335	120166411	-	NM_177845	cytosolic phospholipase A2 epsilon	NP_808513
Fam47e	-1786	chr5:92569561-92569940	379	0.00;0.00	3.35;6.06	-inf	0.0018094	0.527078	chr5	92571536	92591284	+	NM_001170571	uncharacterized protein LOC384198 isoform 2	NP_001164042
Drd3	-1311	chr16:43760761-43761100	339	0.00;0.00	3.35;6.06	-inf	0.0018094	0.527078	chr16	43762241	43822839	+	NM_007877	D(3) dopamine receptor	NP_031903
Cd300ld	36	chr11:114989661-114990040	379	0.00;0.00	3.35;6.06	-inf	0.0018094	0.527078	chr11	114989886	114982445	-	NM_145437	CMRF35-like molecule 5 precursor	NP_663412
LOC100502924	-283	chr4:73605061-73605460	399	3.54;17.10	50.26;29.44	-1.95	0.00181898	0.527078	chr4	73605543	73611922	+	NM_001256481	uncharacterized protein LOC100502924	NP_001243410
Trim40	-685	chr17:36890601-36891020	419	0.88;1.14	6.70;7.79	-2.84	0.0018226	0.527078	chr17	36890125	36881597	-	NM_001172168	tripartite motif-containing protein 40 isoform 2	NP_001165639
Urb1	-1607	chr16:90811901-90812140	239	0.00;0.00	7.82;2.60	-inf	0.00183833	0.527078	chr16	90810413	90751526	-	NM_029497	nucleolar pre-ribosomal-associated protein 1	NP_083773
Samd7	1168	chr3:30747301-30747620	319	0.00;0.00	7.82;2.60	-inf	0.00183833	0.527078	chr3	30746292	30767174	+	NM_029489	sterile alpha motif domain-containing protein 7	NP_083765
Cytl1	1022	chr5:37736381-37736700	319	0.00;0.00	7.82;2.60	-inf	0.00183833	0.527078	chr5	37735518	37739820	+	NM_001081106	cytokine-like protein 1 precursor	NP_001074575
Slc6a19	-845	chr13:73701221-73701860	639	1.77;2.28	7.82;10.39	-2.17	0.00186426	0.528372	chr13	73700695	73681156	-	NM_028878	sodium-dependent neutral amino acid transporter B(0)AT1	NP_083154
Sgip1	-502	chr4:102759581-102760140	559	0.88;3.42	7.82;10.39	-2.08	0.00186426	0.528372	chr4	102760362	102971177	+	NM_144906	SH3-containing GRB2-like protein 3-interacting protein 1	NP_659155
Ccdc169	133	chr3:55139801-55140540	739	1.77;2.28	10.05;8.66	-2.21	0.00186426	0.528372	chr3	55140037	55172935	+	NM_177203	coiled-coil domain-containing protein 169	NP_796177
Zfp846	-667	chr9:20580361-20580960	599	0.88;3.42	10.05;8.66	-2.12	0.00186426	0.528372	chr9	20581327	20595193	+	NM_172919	zinc finger protein 846	NP_766507
Disc1	-1744	chr8:125052041-125052860	819	2.65;1.14	11.17;7.79	-2.32	0.00190322	0.534443	chr8	125054194	125261151	+	NM_174853	disrupted in schizophrenia 1 homolog isoform 2	NP_777278
Gm7978	1365	chr5:94068821-94069540	719	7.96;7.98	17.87;20.78	-1.28	0.00193816	0.534984	chr5	94070545	94066453	-	NM_001270457	uncharacterized protein LOC666203	NP_001257386
BC061212	1365	chr5:94068821-94069540	719	7.96;7.98	17.87;20.78	-1.28	0.00193816	0.534984	chr5	94070545	94066453	-	NM_198667	uncharacterized protein LOC381724	NP_941069
Ott	1741	chrX:148316081-148316460	379	0.88;0.00	3.35;10.39	-3.96	0.00195235	0.534984	chrX	148314529	148521446	+	NM_011022	ovary testis transcribed	NP_035152
Gm15085	1741	chrX:148316081-148316460	379	0.88;0.00	3.35;10.39	-3.96	0.00195235	0.534984	chrX	148314529	148521446	+	NM_001122734	predicted gene 15085	NP_001116206
Sytl3	-1349	chr17:6671921-6672600	679	9.73;4.56	18.99;18.19	-1.38	0.00202442	0.534984	chr17	6673609	6738044	+	NM_031395	synaptotagmin-like protein 3 isoform a	NP_113572
Sh3tc1	-1874	chr5:35730761-35731540	779	4.42;4.56	14.52;12.99	-1.61	0.00204497	0.534984	chr5	35729276	35697179	-	NM_194344	SH3 domain and tetratricopeptide repeats 1	NP_919325
Glg1	-1658	chr8:111260461-111261260	799	3.54;3.42	10.05;13.86	-1.78	0.00210181	0.534984	chr8	111259202	111157557	-	NM_009149	Golgi apparatus protein 1 precursor	NP_033175
Pnmal2	1079	chr7:16945421-16946100	679	3.54;3.42	11.17;12.99	-1.8	0.00210181	0.534984	chr7	16944681	16948828	+	NM_001099636	PNMA-like protein 2	NP_001093106
Ankrd60	1531	chr2:173576441-173577180	739	0.88;1.14	11.17;6.06	-3.09	0.00219104	0.534984	chr2	173578341	173572389	-	NM_001199955	ankyrin repeat domain-containing protein 60 isoform 2	NP_001186884
Swap70	1598	chr7:110223061-110223540	479	0.00;1.14	4.47;7.79	-3.43	0.00223866	0.534984	chr7	110221702	110283506	+	NM_009302	switch-associated protein 70	NP_033328
Chst14	-1486	chr2:118924781-118925240	459	0.88;0.00	4.47;7.79	-3.79	0.00239712	0.534984	chr2	118926496	118928583	+	NM_028117	carbohydrate sulfotransferase 14	NP_082393
Orai2	1796	chr5:136168581-136169140	559	2.65;2.28	10.05;10.39	-2.05	0.00245325	0.534984	chr5	136170656	136147460	-	NM_178751	protein orai-2	NP_848866
Lefty2	-948	chr1:180891841-180892500	659	2.65;2.28	11.17;9.53	-2.07	0.00245325	0.534984	chr1	180893118	180899102	+	NM_177099	left-right determination factor 2 precursor	NP_796073
Nos1ap	-521	chr1:170590161-170590580	419	0.00;1.14	5.58;6.93	-3.46	0.00246975	0.534984	chr1	170589849	170317495	-	NM_001109985	carboxyl-terminal PDZ ligand of neuronal nitric oxide synthase protein isoform 1	NP_001103455
Krt33a	382	chr11:100015641-100016020	379	0.00;1.14	5.58;6.93	-3.46	0.00246975	0.534984	chr11	100016212	100011198	-	NM_027983	keratin, type I cuticular Ha3-I	NP_082259
Tex35	-1365	chr1:157109801-157110220	419	0.88;0.00	6.70;6.06	-3.85	0.00246975	0.534984	chr1	157108645	157099147	-	NM_028540	testis-expressed sequence 35 protein	NP_082816
Phf17	1477	chr3:41557021-41557400	379	0.88;0.00	6.70;6.06	-3.85	0.00246975	0.534984	chr3	41555733	41616864	+	NM_001130184	protein Jade-1	NP_001123656
Slc38a11	-924	chr2:65364721-65365180	459	0.00;1.14	6.70;6.06	-3.49	0.00246975	0.534984	chr2	65364026	65316632	-	NM_177074	putative sodium-coupled neutral amino acid transporter 11	NP_796048
Gm4187	-243	chr7:22329681-22330240	559	0.00;1.14	6.70;6.06	-3.49	0.00246975	0.534984	chr7	22329717	22328793	-	NM_001167159	vomeronasal 1 receptor Vmn1r146	NP_001160631
Gm4133	-243	chr7:22329681-22330240	559	0.00;1.14	6.70;6.06	-3.49	0.00246975	0.534984	chr7	22329717	22328793	-	NM_001167158	vomernasal 1 receptor Vmn1r98	NP_001160630
B3gnt5	1567	chr16:19761561-19762040	479	3.54;0.00	11.17;7.79	-2.42	0.00248979	0.534984	chr16	19760233	19772753	+	NM_054052	lactosylceramide 1,3-N-acetyl-beta-D-glucosaminyltransferase	NP_473393
Mgl2	174	chr11:70130201-70130860	659	0.00;3.42	6.70;11.26	-2.39	0.00250171	0.534984	chr11	70130356	70137542	+	NM_145137	macrophage galactose N-acetyl-galactosamine specific lectin 2	NP_660119
Gm4307	1559	chr10:100347341-100347720	379	2.65;0.00	8.93;7.79	-2.66	0.00251255	0.534984	chr10	100345971	100346881	+	NM_001166641	uncharacterized protein LOC100043239	NP_001160113
Gm4305	1559	chr10:100347341-100347720	379	2.65;0.00	8.93;7.79	-2.66	0.00251255	0.534984	chr10	100345971	100346881	+	NM_001166639	uncharacterized protein LOC100043235	NP_001160111
Gm4303	1559	chr10:100347341-100347720	379	2.65;0.00	8.93;7.79	-2.66	0.00251255	0.534984	chr10	100345971	100346881	+	NM_001166638	uncharacterized protein LOC100043231	NP_001160110
Cst10	-298	chr2:149404681-149405220	539	1.77;1.14	8.93;7.79	-2.52	0.00251255	0.534984	chr2	149405248	149410278	+	NM_021405	cystatin-D precursor	NP_067380
Wipf1	1780	chr2:73527321-73527940	619	4.42;2.28	13.40;10.39	-1.83	0.00255633	0.534984	chr2	73529410	73429616	-	NM_153138	WAS/WASL-interacting protein family member 1	NP_694778
Sh3tc2	-1054	chr18:61951881-61952160	279	0.00;0.00	7.82;1.73	-inf	0.00261712	0.534984	chr18	61953074	62015719	+	NM_172628	SH3 domain and tetratricopeptide repeat-containing protein 2	NP_766216
Mtpap	1209	chr18:4376621-4376980	359	0.00;0.00	7.82;1.73	-inf	0.00261712	0.534984	chr18	4375591	4397330	+	NM_026157	poly(A) RNA polymerase, mitochondrial precursor	NP_080433
Cdc14a	-1848	chr3:116425721-116426040	319	0.00;0.00	7.82;1.73	-inf	0.00261712	0.534984	chr3	116424032	116272552	-	NM_001173553	dual specificity protein phosphatase CDC14A isoform 2	NP_001167024
Gm9897	1864	chr5:4194021-4194440	419	0.88;1.14	5.58;8.66	-2.81	0.00265517	0.534984	chr5	4192366	4197651	+	NM_001042670	mitochondrial transcription termination factor-like	NP_001036135
Rprml	942	chr11:103650201-103650700	499	3.54;1.14	12.28;8.66	-2.16	0.00265562	0.534984	chr11	103649508	103650580	+	NM_001033212	reprimo-like protein	NP_001028384
Gm13139	-1534	chr4:146268501-146269200	699	6.19;3.42	12.28;15.59	-1.54	0.00272961	0.534984	chr4	146270384	146468233	+	NM_001083918	uncharacterized protein LOC666532	NP_001077387
Dhdh	-974	chr7:45489581-45489960	379	0.88;0.00	3.35;9.53	-3.86	0.00274699	0.534984	chr7	45488796	45473562	-	NM_027903	trans-1,2-dihydrobenzene-1,2-diol dehydrogenase	NP_082179
Popdc2	471	chr16:38362441-38362920	479	1.77;0.00	5.58;8.66	-3.01	0.00276983	0.534984	chr16	38362209	38378216	+	NM_022318	popeye domain-containing protein 2 isoform 2	NP_071713
Fgf3	-331	chr7:144838081-144838480	399	1.77;0.00	5.58;8.66	-3.01	0.00276983	0.534984	chr7	144838611	144843348	+	NM_008007	fibroblast growth factor 3 precursor	NP_032033
Gm14479	926	chrX:11319021-11319480	459	1.77;0.00	5.58;9.53	-3.09	0.00285526	0.534984	chrX	11318324	11318642	+	NM_001242951	histone cluster 2 family member	NP_001229880
Gm14477	926	chrX:11319021-11319480	459	1.77;0.00	5.58;9.53	-3.09	0.00285526	0.534984	chrX	11318324	11318642	+	NM_001242949	histone cluster 2 family member	NP_001229878
Gm14476	926	chrX:11319021-11319480	459	1.77;0.00	5.58;9.53	-3.09	0.00285526	0.534984	chrX	11318324	11318642	+	NM_001242950	histone cluster 2 family member	NP_001229879
Gm14475	926	chrX:11319021-11319480	459	1.77;0.00	5.58;9.53	-3.09	0.00285526	0.534984	chrX	11318324	11318642	+	NM_001242954	histone cluster 2 family member	NP_001229883
Gm7609	-1350	chr1:85197821-85198700	879	1.77;6.84	12.28;14.72	-1.65	0.00286824	0.534984	chr1	85199610	85213762	+	NM_001081746	component of Sp100-rs-like	NP_001075215
Fam214b	920	chr4:43044861-43045740	879	4.42;3.42	12.28;12.99	-1.69	0.00293687	0.534984	chr4	43046220	43032413	-	NM_172691	protein FAM214B	NP_766279
Apoa2	-863	chr1:171223881-171224500	619	5.31;2.28	14.52;11.26	-1.76	0.00293687	0.534984	chr1	171225053	171226379	+	NM_013474	apolipoprotein A-II precursor	NP_038502
Olfr527	-1443	chr7:140334181-140334660	479	0.88;1.14	11.17;4.33	-2.94	0.00295235	0.534984	chr7	140335863	140336781	+	NM_001011776	olfactory receptor 527	NP_001011776
Gm7609	250	chr1:85199541-85200180	639	7.96;2.28	20.10;14.72	-1.77	0.00296632	0.534984	chr1	85199610	85213762	+	NM_001081746	component of Sp100-rs-like	NP_001075215
Olfr474	-1042	chr7:107953261-107953940	679	1.77;3.42	8.93;10.39	-1.9	0.00299131	0.534984	chr7	107954642	107955575	+	NM_146495	olfactory receptor 474	NP_666706
Wscd2	591	chr5:113550881-113551140	259	0.00;0.00	6.70;2.60	-inf	0.00312062	0.534984	chr5	113550419	113589725	+	NM_177292	WSC domain-containing protein 2	NP_796266
Vav3	-1876	chr3:109571941-109572320	379	0.00;0.00	6.70;2.60	-inf	0.00312062	0.534984	chr3	109574006	109685694	+	NM_146139	guanine nucleotide exchange factor VAV3 isoform 2	NP_666251
Hmgcr	-884	chr13:96671641-96672000	359	0.00;0.00	6.70;2.60	-inf	0.00312062	0.534984	chr13	96670936	96648961	-	NM_008255	3-hydroxy-3-methylglutaryl-coenzyme A reductase	NP_032281
Gm16451	1429	chr7:20121001-20121300	299	0.00;0.00	6.70;2.60	-inf	0.00312062	0.534984	chr7	20122579	20121655	-	NM_001167149	vomeronasal 1 receptor Vmn1r140	NP_001160621
Gm16451	1425	chr7:22116681-22116960	279	0.00;0.00	6.70;2.60	-inf	0.00312062	0.534984	chr7	22118245	22117321	-	NM_001167149	vomeronasal 1 receptor Vmn1r140	NP_001160621
Gm16442	1429	chr7:20121001-20121300	299	0.00;0.00	6.70;2.60	-inf	0.00312062	0.534984	chr7	20122579	20121655	-	NM_001167148	vomernasal 1 receptor Vmn1r92	NP_001160620
Gm16442	1425	chr7:22116681-22116960	279	0.00;0.00	6.70;2.60	-inf	0.00312062	0.534984	chr7	22118245	22117321	-	NM_001167148	vomernasal 1 receptor Vmn1r92	NP_001160620
4931431F19Rik	-697	chr7:104130241-104130800	559	1.77;1.14	7.82;7.79	-2.42	0.00312292	0.534984	chr7	104129823	104127912	-	NM_027634	ubiquilin 1-like	NP_081910
Cacnb2	195	chr2:14604301-14604700	399	1.77;1.14	8.93;6.93	-2.45	0.00312293	0.534984	chr2	14604305	14987908	+	NM_023116	voltage-dependent L-type calcium channel subunit beta-2 isoform 1	NP_075605
Lrrc10b	-1413	chr19:10458601-10459120	519	0.88;0.00	5.58;6.06	-3.72	0.00319795	0.534984	chr19	10457447	10455370	-	NM_001111140	leucine-rich repeat-containing protein 10B	NP_001104610
Abhd2	-785	chr7:79272281-79272680	399	0.88;0.00	5.58;6.06	-3.72	0.00319795	0.534984	chr7	79273265	79361601	+	NM_018811	abhydrolase domain-containing protein 2	NP_061281
Mb21d1	-663	chr9:78443621-78444000	379	0.00;1.14	4.47;6.93	-3.32	0.00319795	0.534984	chr9	78443147	78430517	-	NM_173386	cyclic GMP-AMP synthase	NP_775562
BB287469	-1017	chr12:87617601-87618100	499	0.00;1.14	5.58;6.06	-3.35	0.00319795	0.534984	chr12	87618867	87622955	+	NM_001177573	eukaryotic translation initiation factor 1A-like 3	NP_001171044
Slc4a11	1919	chr2:130695401-130695800	399	0.88;0.00	6.70;5.20	-3.75	0.00319795	0.534984	chr2	130697519	130684107	-	NM_001081162	sodium bicarbonate transporter-like protein 11	NP_001074631
Skint7	-1906	chr4:111970741-111971300	559	0.88;0.00	6.70;5.20	-3.75	0.00319795	0.534984	chr4	111972926	111983120	+	NM_177818	selection and upkeep of intraepithelial T-cells protein 7 isoform 2 precursor	NP_808486
Pde4d	-66	chr13:108653941-108654280	339	0.88;0.00	6.70;5.20	-3.75	0.00319795	0.534984	chr13	108654176	109955969	+	NM_011056	cAMP-specific 3',5'-cyclic phosphodiesterase 4D	NP_035186
Faf1	554	chr4:109676941-109677420	479	0.88;0.00	6.70;5.20	-3.75	0.00319795	0.534984	chr4	109676626	109963960	+	NM_007983	FAS-associated factor 1	NP_032009
Cxcr2	-683	chr1:74153101-74153520	419	0.88;0.00	6.70;5.20	-3.75	0.00319795	0.534984	chr1	74153993	74161246	+	NM_009909	C-X-C chemokine receptor type 2	NP_034039
Scn11a	1056	chr9:119824121-119824680	559	0.00;1.14	6.70;5.20	-3.38	0.00319795	0.534984	chr9	119825456	119753764	-	NM_011887	sodium channel protein type 11 subunit alpha	NP_036017
Fam81a	-653	chr9:70142001-70142420	419	0.00;1.14	6.70;5.20	-3.38	0.00319795	0.534984	chr9	70141557	70089309	-	NM_029784	protein FAM81A	NP_084060
Vmn1r11	-1302	chr6:57135861-57136240	379	0.00;0.00	3.35;5.20	-inf	0.00326307	0.534984	chr6	57137352	57138252	+	NM_053233	vomeronasal 1 receptor, C3	NP_444463
Tnrc6b	1238	chr15:80712361-80712740	379	0.00;0.00	3.35;5.20	-inf	0.00326307	0.534984	chr15	80711312	80941086	+	NM_144812	trinucleotide repeat-containing gene 6B protein isoform 1	NP_659061
Tmem9	-1150	chr1:136016661-136017040	379	0.00;0.00	3.35;5.20	-inf	0.00326307	0.534984	chr1	136018000	136035030	+	NM_025439	transmembrane protein 9 precursor	NP_079715
Tacr2	173	chr10:62252481-62252740	259	0.00;0.00	3.35;5.20	-inf	0.00326307	0.534984	chr10	62252437	62265990	+	NM_009314	substance-K receptor	NP_033340
Stau1	1598	chr2:166994501-166994860	359	0.00;0.00	3.35;5.20	-inf	0.00326307	0.534984	chr2	166996278	166948141	-	NM_011490	double-stranded RNA-binding protein Staufen homolog 1 isoform 3	NP_035620
Slc2a12	650	chr10:22645481-22645840	359	0.00;0.00	3.35;5.20	-inf	0.00326307	0.534984	chr10	22645010	22703880	+	NM_178934	solute carrier family 2, facilitated glucose transporter member 12	NP_849265
Shf	828	chr2:122367941-122368240	299	0.00;0.00	3.35;5.20	-inf	0.00326307	0.534984	chr2	122368918	122348891	-	NM_001013829	SH2 domain-containing adapter protein F	NP_001013851
Sel1l2	-480	chr2:140390001-140390380	379	0.00;0.00	3.35;5.20	-inf	0.00326307	0.534984	chr2	140389710	140229857	-	NM_001033296	protein sel-1 homolog 2 precursor	NP_001028468
Rhd	-445	chr4:134863901-134864280	379	0.00;0.00	3.35;5.20	-inf	0.00326307	0.534984	chr4	134864535	134896172	+	NM_011270	blood group Rh(D) polypeptide	NP_035400
Olfr65	589	chr7:103906741-103907120	379	0.00;0.00	3.35;5.20	-inf	0.00326307	0.534984	chr7	103906341	103907447	+	NM_013616	olfactory receptor 65	NP_038644
Mplkip	358	chr13:17695581-17695960	379	0.00;0.00	3.35;5.20	-inf	0.00326307	0.534984	chr13	17695412	17699105	+	NM_025479	M-phase-specific PLK1-interacting protein	NP_079755
Mfap3l	-893	chr8:60654021-60654400	379	0.00;0.00	3.35;5.20	-inf	0.00326307	0.534984	chr8	60655103	60676731	+	NM_001177881	microfibrillar-associated protein 3-like precursor	NP_001171352
Kif3a	1852	chr11:53569041-53569420	379	0.00;0.00	3.35;5.20	-inf	0.00326307	0.534984	chr11	53567378	53604244	+	NM_008443	kinesin-like protein KIF3A	NP_032469
Fam115c	-269	chr6:42645121-42645500	379	0.00;0.00	3.35;5.20	-inf	0.00326307	0.534984	chr6	42645041	42623042	-	NM_146174	protein FAM115C	NP_666286
Abcc6	1526	chr7:46028581-46028940	359	0.00;0.00	3.35;5.20	-inf	0.00326307	0.534984	chr7	46030286	45976379	-	NM_018795	multidrug resistance-associated protein 6	NP_061265
Rmdn3	-866	chr2:119157701-119158100	399	0.00;0.00	4.47;4.33	-inf	0.00326307	0.534984	chr2	119157034	119136997	-	NM_001033136	regulator of microtubule dynamics protein 3	NP_001028308
Ptcra	-1678	chr17:46765281-46765500	219	0.00;0.00	4.47;4.33	-inf	0.00326307	0.534984	chr17	46763712	46755662	-	NM_011195	pre T-cell antigen receptor alpha precursor	NP_035325
Plekhg1	-676	chr10:3739521-3739880	359	0.00;0.00	4.47;4.33	-inf	0.00326307	0.534984	chr10	3740376	3967302	+	NM_001159942	pleckstrin homology domain containing, family G (with RhoGef domain) member 1	NP_001153414
Nit2	1342	chr16:57165741-57166240	499	0.00;0.00	4.47;4.33	-inf	0.00326307	0.534984	chr16	57167332	57156664	-	NM_023175	omega-amidase NIT2	NP_075664
Nfatc2ip	647	chr7:126395861-126396320	459	0.00;0.00	4.47;4.33	-inf	0.00326307	0.534984	chr7	126396737	126382853	-	NM_010900	NFATC2-interacting protein	NP_035030
Kcp	-1358	chr6:29509121-29509500	379	0.00;0.00	4.47;4.33	-inf	0.00326307	0.534984	chr6	29507952	29482035	-	NM_001029985	kielin/chordin-like protein precursor	NP_001025156
Gm3286	30	chr5:95473401-95473740	339	0.00;0.00	4.47;4.33	-inf	0.00326307	0.534984	chr5	95473540	95485105	+	NM_001167792	uncharacterized protein LOC100041354 isoform 2	NP_001161264
Ctrb1	-1260	chr8:111692081-111692460	379	0.00;0.00	4.47;4.33	-inf	0.00326307	0.534984	chr8	111691010	111686509	-	NM_025583	chymotrypsinogen B precursor	NP_079859
Cic	-768	chr7:25281261-25281560	299	0.00;0.00	4.47;4.33	-inf	0.00326307	0.534984	chr7	25282178	25294148	+	NM_027882	protein capicua homolog isoform a	NP_082158
Awat1	514	chrX:100572621-100572900	279	0.00;0.00	4.47;4.33	-inf	0.00326307	0.534984	chrX	100572246	100578206	+	NM_001081136	acyl-CoA wax alcohol acyltransferase 1	NP_001074605
Zc3h7a	1223	chr16:11174981-11175360	379	0.00;0.00	2.23;6.93	-inf	0.00326421	0.534984	chr16	11176393	11136593	-	NM_145931	zinc finger CCCH-type containing 7A	NP_666043
Zscan4f	36	chr7:11397801-11398100	299	0.00;0.00	5.58;3.46	-inf	0.00327533	0.534984	chr7	11397914	11402318	+	NM_001110316	zinc finger and SCAN domain containing protein 4F	NP_001103786
Zfp433	-244	chr10:81704421-81704740	319	0.00;0.00	5.58;3.46	-inf	0.00327533	0.534984	chr10	81704824	81721976	+	NM_001243067	zinc finger protein 433	NP_001229996
Rtn4ip1	814	chr10:43902461-43902780	319	0.00;0.00	5.58;3.46	-inf	0.00327533	0.534984	chr10	43901806	43947862	+	NM_130892	reticulon-4-interacting protein 1, mitochondrial precursor	NP_570962
Rnf10	475	chr5:115272201-115272640	439	0.00;0.00	5.58;3.46	-inf	0.00327533	0.534984	chr5	115272895	115241769	-	NM_016698	RING finger protein 10	NP_057907
Nell2	-534	chr15:95529021-95529460	439	0.00;0.00	5.58;3.46	-inf	0.00327533	0.534984	chr15	95528706	95219449	-	NM_016743	protein kinase C-binding protein NELL2 precursor	NP_058023
Mup2	1123	chr4:61438441-61438720	279	0.00;0.00	5.58;3.46	-inf	0.00327533	0.534984	chr4	61439703	61300952	-	NM_001045550	major urinary protein 2 precursor	NP_001039015
Hnrnpa2b1	1294	chr6:51468381-51468820	439	0.00;0.00	5.58;3.46	-inf	0.00327533	0.534984	chr6	51469894	51460931	-	NM_182650	heterogeneous nuclear ribonucleoproteins A2/B1 isoform 2	NP_872591
Gstm1	-1037	chr3:108018861-108019160	299	0.00;0.00	5.58;3.46	-inf	0.00327533	0.534984	chr3	108017973	108012249	-	NM_010358	glutathione S-transferase Mu 1	NP_034488
Gak	969	chr5:108628601-108628940	339	0.00;0.00	5.58;3.46	-inf	0.00327533	0.534984	chr5	108629739	108569413	-	NM_153569	cyclin-G-associated kinase	NP_705797
Elp3	1582	chr14:65591341-65591720	379	0.00;0.00	5.58;3.46	-inf	0.00327533	0.534984	chr14	65593112	65530445	-	NM_028811	elongator complex protein 3 isoform 2	NP_083087
Mup1	610	chr4:60501061-60501640	579	0.00;1.14	8.93;3.46	-3.44	0.00331113	0.53837	chr4	60501960	60498933	-	NM_001163010	major urinary protein 1 isoform b precursor	NP_001156482
Eif2ak1	849	chr5:143872241-143873180	939	8.85;10.26	21.22;20.78	-1.14	0.00333157	0.54076	chr5	143871861	143902717	+	NM_013557	eukaryotic translation initiation factor 2-alpha kinase 1	NP_038585
Taf11	1014	chr17:27906501-27906920	419	2.65;0.00	11.17;6.93	-2.77	0.00335414	0.543827	chr17	27907724	27901127	-	NM_026836	transcription initiation factor TFIID subunit 11	NP_081112
Nr1h4	-242	chr10:89506641-89507160	519	0.88;4.56	10.05;9.53	-1.85	0.00348731	0.560737	chr10	89506658	89454233	-	NM_009108	bile acid receptor isoform 3	NP_033134
E030019B06Rik	1729	chr7:139614121-139615080	959	7.08;3.42	15.64;13.86	-1.49	0.00353511	0.566452	chr7	139616329	139600950	-	NM_001243018	uncharacterized protein LOC212124	NP_001229947
Spink3	-1003	chr18:43737901-43738580	679	2.65;5.70	11.17;12.99	-1.53	0.00355446	0.56684	chr18	43737237	43728068	-	NM_009258	serine protease inhibitor Kazal-type 3 precursor	NP_033284
Ptpro	-70	chr6:137410361-137410940	579	2.65;5.70	13.40;11.26	-1.56	0.00355446	0.56684	chr6	137410720	137464633	+	NM_001164403	receptor-type tyrosine-protein phosphatase O isoform 4	NP_001157875
Ifitm2	-1469	chr7:140956961-140957900	939	9.73;6.84	16.75;22.52	-1.24	0.00360397	0.572989	chr7	140955961	140954838	-	NM_030694	interferon-induced transmembrane protein 2	NP_109619
Gm9125	1373	chr3:93941721-93942620	899	10.61;6.84	17.87;25.98	-1.33	0.00363331	0.573379	chr3	93943543	93936632	-	NM_001163730	TD and POZ domain containing-like	NP_001157202
Gcnt4	-1928	chr13:96922561-96922960	399	0.88;0.00	8.93;3.46	-3.81	0.00363904	0.573379	chr13	96924688	96950914	+	NM_001166065	beta-1,3-galactosyl-O-glycosyl-glycoprotein beta-1,6-N-acetylglucosaminyltransferase 4	NP_001159537
Grid1	635	chr14:34820401-34821140	739	4.42;1.14	8.93;12.12	-1.92	0.00366024	0.573379	chr14	34820135	35581115	+	NM_008166	glutamate receptor ionotropic, delta-1 precursor	NP_032192
Vapb	-1790	chr2:173735341-173736220	879	2.65;3.42	10.05;11.26	-1.81	0.00366024	0.573379	chr2	173737570	173784336	+	NM_019806	vesicle-associated membrane protein-associated protein B	NP_062780
Zfp503	911	chr14:21988481-21988900	419	0.88;0.00	7.82;4.33	-3.78	0.00383892	0.573379	chr14	21989601	21983961	-	NM_145459	zinc finger protein 503	NP_663434
Ttf2	-1327	chr3:100970821-100971160	339	0.88;0.00	7.82;4.33	-3.78	0.00383892	0.573379	chr3	100969663	100938859	-	NM_001013026	transcription termination factor 2	NP_001013044
Disp1	1459	chr1:183219801-183220340	539	0.88;0.00	7.82;4.33	-3.78	0.00383892	0.573379	chr1	183221529	183086263	-	NM_026866	protein dispatched homolog 1	NP_081142
Gas2l3	-1923	chr10:89445621-89446160	539	4.42;3.42	14.52;10.39	-1.67	0.00392172	0.573379	chr10	89443967	89408822	-	NM_001079876	GAS2-like protein 3	NP_001073345
Atp6v1e2	-1303	chr17:86948641-86949740	1099	7.96;6.84	16.75;18.19	-1.24	0.00393468	0.573379	chr17	86947887	86944108	-	NM_029121	V-type proton ATPase subunit E 2	NP_083397
Bcar3	871	chr3:122420461-122420840	379	0.88;0.00	8.93;4.33	-3.91	0.00411479	0.573379	chr3	122419779	122530182	+	NM_013867	breast cancer anti-estrogen resistance protein 3	NP_038895
Pcp2	569	chr8:3624241-3624720	479	1.77;0.00	6.70;6.93	-2.95	0.00419772	0.573379	chr8	3625049	3623373	-	NM_001129804	Purkinje cell protein 2 isoform 2	NP_001123276
Olfr1425	-510	chr19:12074841-12075440	599	1.77;0.00	6.70;6.93	-2.95	0.00419772	0.573379	chr19	12074630	12073694	-	NM_001011853	olfactory receptor 1425	NP_001011853
Rpusd3	-1810	chr6:113420881-113421420	539	0.88;1.14	6.70;6.93	-2.75	0.00419772	0.573379	chr6	113419340	113415318	-	NM_001033204	RNA pseudouridylate synthase domain-containing protein 3	NP_001028376
Elp4	1740	chr2:105902521-105903000	479	0.88;1.14	6.70;6.93	-2.75	0.00419772	0.573379	chr2	105904500	105700108	-	NM_023876	elongator complex protein 4	NP_076365
Tmem259	940	chr10:79983081-79983700	619	1.77;2.28	7.82;9.53	-2.1	0.00421073	0.573379	chr10	79984330	79977119	-	NM_001003949	membralin	NP_001003949
Kcnn4	128	chr7:24370141-24370640	499	1.77;2.28	8.93;8.66	-2.12	0.00421073	0.573379	chr7	24370262	24385212	+	NM_008433	intermediate conductance calcium-activated potassium channel protein 4	NP_032459
Ly6g6f	1245	chr17:35084041-35084660	619	9.73;7.98	16.75;26.85	-1.3	0.00466687	0.573379	chr17	35085595	35080537	-	NM_001163192	lymphocyte antigen 6 complex locus protein G6f precursor	NP_001156664
Zfand2b	-1845	chr1:75166461-75167140	679	4.42;9.12	13.40;21.65	-1.37	0.00470631	0.573379	chr1	75168645	75171626	+	NM_001159906	AN1-type zinc finger protein 2B	NP_001153378
Pigu	434	chr2:155356801-155357180	379	0.00;0.00	2.23;6.06	-inf	0.00471771	0.573379	chr2	155357424	155278251	-	NM_001004721	phosphatidylinositol glycan anchor biosynthesis class U protein precursor	NP_001004721
Gm4307	423	chr10:100341121-100341400	279	0.00;0.00	2.23;6.06	-inf	0.00471771	0.573379	chr10	100340837	100341762	+	NM_001166641	uncharacterized protein LOC100043239	NP_001160113
Gm4305	423	chr10:100341121-100341400	279	0.00;0.00	2.23;6.06	-inf	0.00471771	0.573379	chr10	100340837	100341762	+	NM_001166639	uncharacterized protein LOC100043235	NP_001160111
Gm4303	423	chr10:100341121-100341400	279	0.00;0.00	2.23;6.06	-inf	0.00471771	0.573379	chr10	100340837	100341762	+	NM_001166638	uncharacterized protein LOC100043231	NP_001160110
Mgat3	1660	chr15:80175121-80175640	519	8.85;7.98	18.99;19.05	-1.18	0.00474164	0.573379	chr15	80173720	80215519	+	NM_010795	beta-1,4-mannosyl-glycoprotein 4-beta-N-acetylglucosaminyltransferase	NP_034925
Cox4i2	-1402	chr2:152752481-152753060	579	6.19;2.28	13.40;12.12	-1.59	0.00474475	0.573379	chr2	152754172	152765037	+	NM_053091	cytochrome c oxidase subunit 4 isoform 2, mitochondrial isoform 2 precursor	NP_444321
Gm13251	1981	chr4:146450741-146451280	539	6.19;2.28	14.52;11.26	-1.61	0.00474475	0.573379	chr4	146449029	146469440	+	NM_001085522	uncharacterized protein LOC433791	NP_001078991
Rcn3	-457	chr7:45092401-45092940	539	2.65;6.84	12.28;12.99	-1.41	0.00474476	0.573379	chr7	45092213	45082913	-	NM_026555	reticulocalbin-3 precursor	NP_080831
Sgca	-853	chr11:94977021-94977340	319	1.77;1.14	13.40;3.46	-2.54	0.00480771	0.573379	chr11	94976327	94962776	-	NM_009161	alpha-sarcoglycan precursor	NP_033187
Zfp60	1862	chr7:27733161-27733380	219	0.00;0.00	6.70;1.73	-inf	0.00482676	0.573379	chr7	27731408	27751689	+	NM_029531	zinc finger protein 60	NP_083807
Vmn1r214	-1387	chr13:23032841-23033060	219	0.00;0.00	6.70;1.73	-inf	0.00482676	0.573379	chr13	23034337	23035441	+	NM_134214	vomeronasal 1 receptor 214	NP_598975
Ott	-1371	chrX:149096461-149096700	239	0.00;0.00	6.70;1.73	-inf	0.00482676	0.573379	chrX	149097951	149138152	+	NM_011022	ovary testis transcribed	NP_035152
Olfr618	-1247	chr7:103595921-103596220	299	0.00;0.00	6.70;1.73	-inf	0.00482676	0.573379	chr7	103597317	103598274	+	NM_147047	olfactory receptor 618	NP_667258
Hao2	-990	chr3:98894121-98894320	199	0.00;0.00	6.70;1.73	-inf	0.00482676	0.573379	chr3	98893230	98874518	-	NM_019545	hydroxyacid oxidase 2	NP_062418
Gm6164	447	chr7:20205021-20205300	279	0.00;0.00	6.70;1.73	-inf	0.00482676	0.573379	chr7	20205607	20204683	-	NM_001167153	vomernasal 1 receptor Vmn1r96	NP_001160625
Gm3500	-1696	chr14:5390621-5390920	299	0.00;0.00	6.70;1.73	-inf	0.00482676	0.573379	chr14	5389074	5365791	-	NM_001256886	predicted gene 3468	NP_001243815
Gm2897	-1074	chr14:3048101-3048320	219	0.00;0.00	6.70;1.73	-inf	0.00482676	0.573379	chr14	3049284	3076838	+	NM_001177715	alpha6-takusan-like	NP_001171186
Gm15085	-1371	chrX:149096461-149096700	239	0.00;0.00	6.70;1.73	-inf	0.00482676	0.573379	chrX	149097951	149138152	+	NM_001122734	predicted gene 15085	NP_001116206
Arhgap44	1041	chr11:65161781-65162060	279	0.00;0.00	6.70;1.73	-inf	0.00482676	0.573379	chr11	65162961	65002038	-	NM_175003	rho GTPase-activating protein 44 isoform 2	NP_778168
Aip	-1015	chr19:4122421-4122760	339	0.00;0.00	6.70;1.73	-inf	0.00482676	0.573379	chr19	4121575	4113755	-	NM_001276284	AH receptor-interacting protein	NP_001263213
Wdr63	1996	chr3:146105781-146106300	519	1.77;4.56	13.40;8.66	-1.8	0.00512946	0.573379	chr3	146108036	146040525	-	NM_172864	WD repeat domain 63	NP_766452
Dab2ip	-1120	chr2:35620621-35621100	479	1.77;2.28	14.52;6.06	-2.35	0.00513383	0.573379	chr2	35621980	35730994	+	NM_001114124	disabled homolog 2-interacting protein isoform 2	NP_001107596
Tdpoz5	294	chr3:93960741-93961300	559	2.65;1.14	7.82;8.66	-2.12	0.00513445	0.573379	chr3	93961314	93960291	-	NM_207273	TD and POZ domain-containing protein 5	NP_997156
Gm10697	294	chr3:93960741-93961300	559	2.65;1.14	7.82;8.66	-2.12	0.00513445	0.573379	chr3	93961314	93960291	-	NM_001163731	predicted gene 10697	NP_001157203
Gm10142	-636	chr10:77714821-77715520	699	1.77;2.28	12.28;6.93	-2.25	0.00514337	0.573379	chr10	77715806	77716169	+	NM_001205035	uncharacterized protein LOC100502921	NP_001191964
Mrgprx1	1137	chr7:48026181-48026740	559	3.54;3.42	13.40;9.53	-1.72	0.00529077	0.573379	chr7	48027597	48020970	-	NM_207540	mas-related G-protein coupled receptor member X1	NP_997423
Atp10a	1569	chr7:58659401-58660140	739	3.54;2.28	13.40;8.66	-1.92	0.0054115	0.573379	chr7	58658201	58829426	+	NM_009728	probable phospholipid-transporting ATPase VA	NP_033858
Thada	-1232	chr17:84467261-84467620	359	0.00;0.00	5.58;2.60	-inf	0.00548919	0.573379	chr17	84466208	84190055	-	NM_183021	thyroid adenoma-associated protein homolog	NP_898842
Taco1	1464	chr11:106067441-106067700	259	0.00;0.00	5.58;2.60	-inf	0.00548919	0.573379	chr11	106066106	106073612	+	NM_027346	translational activator of cytochrome c oxidase 1	NP_081622
Sowahd	1906	chrX:37050561-37050940	379	0.00;0.00	5.58;2.60	-inf	0.00548919	0.573379	chrX	37048844	37050418	+	NM_173779	ankyrin repeat domain-containing protein SOWAHD	NP_776140
Prm1	1963	chr16:10794721-10795000	279	0.00;0.00	5.58;2.60	-inf	0.00548919	0.573379	chr16	10796823	10796331	-	NM_013637	sperm protamine P1	NP_038665
Plgrkt	-1699	chr19:29363381-29363760	379	0.00;0.00	5.58;2.60	-inf	0.00548919	0.573379	chr19	29361871	29348676	-	NM_026362	plasminogen receptor (KT)	NP_080638
Olfr449	1038	chr6:42838801-42839040	239	0.00;0.00	5.58;2.60	-inf	0.00548919	0.573379	chr6	42837882	42838818	+	NM_147064	olfactory receptor 449	NP_667275
Ndst3	1102	chr3:123671181-123671400	219	0.00;0.00	5.58;2.60	-inf	0.00548919	0.573379	chr3	123672392	123526165	-	NM_031186	bifunctional heparan sulfate N-deacetylase/N-sulfotransferase 3	NP_112463
Map7	-1909	chr10:20146821-20147200	379	0.00;0.00	5.58;2.60	-inf	0.00548919	0.573379	chr10	20148919	20281590	+	NM_008635	ensconsin isoform 1	NP_032661
Krr1	-524	chr10:111971981-111972360	379	0.00;0.00	5.58;2.60	-inf	0.00548919	0.573379	chr10	111972694	111988430	+	NM_178610	KRR1 small subunit processome component homolog	NP_848725
Fam118a	529	chr15:85037401-85037780	379	0.00;0.00	5.58;2.60	-inf	0.00548919	0.573379	chr15	85037061	85052016	+	NM_177067	protein FAM118A isoform b	NP_796041
Cd109	1935	chr9:78617301-78617660	359	0.00;0.00	5.58;2.60	-inf	0.00548919	0.573379	chr9	78615545	78716260	+	NM_153098	CD109 antigen precursor	NP_694738
Babam1	-444	chr8:71396221-71396600	379	0.00;0.00	5.58;2.60	-inf	0.00548919	0.573379	chr8	71396854	71404772	+	NM_026636	BRISC and BRCA1-A complex member 1	NP_080912
AY761184	1057	chr8:21702421-21702760	339	0.00;0.00	5.58;2.60	-inf	0.00548919	0.573379	chr8	21703647	21702523	-	NM_001007582	uncharacterized protein LOC382000 precursor	NP_001007583
Arhgef11	-1880	chr3:87616681-87617060	379	0.00;0.00	5.58;2.60	-inf	0.00548919	0.573379	chr3	87618750	87738033	+	NM_001003912	rho guanine nucleotide exchange factor 11	NP_001003912
1700034O15Rik	1000	chr6:41685241-41685620	379	0.00;0.00	5.58;2.60	-inf	0.00548919	0.573379	chr6	41684430	41685717	+	NM_029671	uncharacterized protein C7orf34 homolog precursor	NP_083947
Atp8a2	-1856	chr14:60088501-60088880	379	0.88;0.00	8.93;2.60	-3.7	0.00552936	0.573379	chr14	60086834	59647740	-	NM_015803	probable phospholipid-transporting ATPase IB	NP_056618
Gm15319	152	chr8:20362361-20363740	1379	13.27;5.70	34.62;20.78	-1.55	0.00560875	0.573379	chr8	20363202	20337663	-	NM_001177408	testis-specific gene with ankyrin repeats and PEST domain-like	NP_001170879
Tfap2a	393	chr13:40733201-40733660	459	0.88;1.14	5.58;6.93	-2.63	0.00573336	0.573379	chr13	40733823	40715674	-	NM_011547	transcription factor AP-2-alpha isoform a	NP_035677
1700006E09Rik	-325	chr11:101986561-101986900	339	0.88;1.14	5.58;6.93	-2.63	0.00573336	0.573379	chr11	101987055	101992264	+	NM_029287	uncharacterized protein C17orf105 homolog	NP_083563
1700026D08Rik	839	chr7:83793781-83794220	439	1.77;0.00	7.82;5.20	-2.88	0.00573336	0.573379	chr7	83794839	83775616	-	NM_029335	uncharacterized protein C15orf26 homolog	NP_083611
Trip13	737	chr13:73936821-73937240	419	0.00;2.28	6.70;6.06	-2.49	0.00573336	0.573379	chr13	73937767	73912461	-	NM_027182	pachytene checkpoint protein 2 homolog	NP_081458
Cdh1	1853	chr8:106604821-106605620	799	3.54;6.84	11.17;16.45	-1.41	0.00588893	0.573379	chr8	106603367	106670246	+	NM_009864	cadherin-1 precursor	NP_033994
Chdh	48	chr14:30022221-30023140	919	7.08;9.12	15.64;22.52	-1.24	0.00600844	0.573379	chr14	30022632	30040466	+	NM_175343	choline dehydrogenase, mitochondrial	NP_780552
Arpp21	1109	chr9:112184321-112185360	1039	13.27;7.98	22.34;21.65	-1.05	0.00607876	0.573379	chr9	112185949	112065090	-	NM_001177618	cAMP-regulated phosphoprotein 21 isoform 3	NP_001171089
Cryge	223	chr1:65050681-65051200	519	6.19;3.42	13.40;12.99	-1.46	0.00612676	0.573379	chr1	65051163	65048556	-	NM_007777	gamma-crystallin E	NP_031803
Lrriq3	1497	chr3:155094781-155095080	299	0.00;1.14	2.23;8.66	-3.26	0.0062493	0.573379	chr3	155093433	155194278	+	NM_028938	leucine-rich repeat and IQ domain-containing protein 3	NP_083214
C1qc	1444	chr4:136891161-136891780	619	1.77;3.42	13.40;7.79	-2.03	0.00625031	0.573379	chr4	136892914	136889801	-	NM_007574	complement C1q subcomponent subunit C precursor	NP_031600
Ak2	1067	chr4:128994001-128994580	579	2.65;2.28	7.82;10.39	-1.88	0.00640593	0.573379	chr4	128993223	129008723	+	NM_001033966	adenylate kinase 2, mitochondrial isoform a	NP_001029138
Gm13154	-1326	chr4:147551721-147552180	459	1.77;3.42	8.93;9.53	-1.83	0.00640593	0.573379	chr4	147553276	147585201	+	NM_001014397	uncharacterized protein LOC433804	NP_001014419
A430089I19Rik	-34	chr5:94306641-94307020	379	2.65;0.00	14.52;1.73	-2.61	0.00648209	0.573379	chr5	94306796	94302518	-	NM_177913	uncharacterized protein LOC331195	NP_808581
Vmn2r43	-1531	chr7:8261921-8262340	419	0.88;1.14	4.47;10.39	-2.88	0.00649395	0.573379	chr7	8260599	8244350	-	NM_198961	vomeronasal 2, receptor 43 precursor	NP_945199
Trim50	-885	chr5:135352221-135352600	379	0.00;0.00	3.35;4.33	-inf	0.00683591	0.573379	chr5	135353295	135367654	+	NM_178240	E3 ubiquitin-protein ligase TRIM50	NP_839971
Rgs18	-1919	chr1:144777181-144777500	319	0.00;0.00	3.35;4.33	-inf	0.00683591	0.573379	chr1	144775421	144752840	-	NM_022881	regulator of G-protein signaling 18	NP_075019
Ptf1a	698	chr2:19446241-19446480	239	0.00;0.00	3.35;4.33	-inf	0.00683591	0.573379	chr2	19445662	19447501	+	NM_018809	pancreas transcription factor 1 subunit alpha	NP_061279
Prokr2	-1073	chr2:132386401-132386640	239	0.00;0.00	3.35;4.33	-inf	0.00683591	0.573379	chr2	132385447	132370328	-	NM_144944	prokineticin receptor 2	NP_659193
Nlrx1	1247	chr9:44266781-44267100	319	0.00;0.00	3.35;4.33	-inf	0.00683591	0.573379	chr9	44268187	44252712	-	NM_001163743	NLR family member X1	NP_001157215
Mtmr1	-809	chrX:71363761-71364140	379	0.00;0.00	3.35;4.33	-inf	0.00683591	0.573379	chrX	71364759	71419196	+	NM_016985	myotubularin-related protein 1	NP_058681
Lamtor4	699	chr5:138256001-138256360	359	0.00;0.00	3.35;4.33	-inf	0.00683591	0.573379	chr5	138255481	138259395	+	NM_001081108	ragulator complex protein LAMTOR4	NP_001074577
Gm20831	661	chrY:17965661-17965980	319	0.00;0.00	3.35;4.33	-inf	0.00683591	0.573379	chrY	17965159	17967598	+	NM_001103152	predicted gene, 20831	NP_001096622
Flrt1	1629	chr19:7103981-7104220	239	0.00;0.00	3.35;4.33	-inf	0.00683591	0.573379	chr19	7105729	7092010	-	NM_201411	fibronectin leucine rich transmembrane protein 1	NP_958813
Calhm1	-816	chr19:47144801-47145180	379	0.00;0.00	3.35;4.33	-inf	0.00683591	0.573379	chr19	47144174	47141034	-	NM_001081271	calcium homeostasis modulator protein 1	NP_001074740
Alox12	-169	chr11:70255321-70255700	379	0.00;0.00	3.35;4.33	-inf	0.00683591	0.573379	chr11	70255341	70241454	-	NM_007440	arachidonate 12-lipoxygenase, 12S-type	NP_031466
Acsm1	-1577	chr7:119616101-119616400	299	0.00;0.00	3.35;4.33	-inf	0.00683591	0.573379	chr7	119617827	119662515	+	NM_054094	acyl-coenzyme A synthetase ACSM1, mitochondrial	NP_473435
Acbd7	-827	chr2:3335161-3335520	359	0.00;0.00	3.35;4.33	-inf	0.00683591	0.573379	chr2	3336167	3340997	+	NM_030063	acyl-CoA-binding domain-containing protein 7	NP_084339
A3galt2	-1347	chr4:128757721-128758100	379	0.00;0.00	3.35;4.33	-inf	0.00683591	0.573379	chr4	128759257	128769298	+	NM_001009819	alpha-1,3-galactosyltransferase 2 precursor	NP_001009819
Vmn1r58	-55	chr7:5413001-5413400	399	0.00;0.00	4.47;3.46	-inf	0.00683591	0.573379	chr7	5413145	5408889	-	NM_030739	vomeronasal 1 receptor 58	NP_109664
Ube2h	-817	chr6:30244361-30244880	519	0.00;0.00	4.47;3.46	-inf	0.00683591	0.573379	chr6	30243803	30211289	-	NM_001169577	ubiquitin-conjugating enzyme E2 H isoform 3	NP_001163048
Tial1	-667	chr7:128462001-128462360	359	0.00;0.00	4.47;3.46	-inf	0.00683591	0.573379	chr7	128461513	128439776	-	NM_009383	nucleolysin TIAR	NP_033409
Tdpoz1	153	chr3:93675921-93676340	419	0.00;0.00	4.47;3.46	-inf	0.00683591	0.573379	chr3	93676283	93669332	-	NM_148949	TD and POZ domain-containing protein 1	NP_683751
Spata18	1671	chr5:73652881-73653220	339	0.00;0.00	4.47;3.46	-inf	0.00683591	0.573379	chr5	73651379	73679484	+	NM_178387	mitochondria-eating protein	NP_848474
Smg1	37	chr7:118243421-118243780	359	0.00;0.00	4.47;3.46	-inf	0.00683591	0.573379	chr7	118243637	118131311	-	NM_001031814	serine/threonine-protein kinase SMG1	NP_001026984
Rnf17	-666	chr14:56401881-56402180	299	0.00;0.00	4.47;3.46	-inf	0.00683591	0.573379	chr14	56402696	56525031	+	NM_001033043	RING finger protein 17	NP_001028215
Rab7l1	-1166	chr1:131865921-131866300	379	0.00;0.00	4.47;3.46	-inf	0.00683591	0.573379	chr1	131867276	131872889	+	NM_144875	ras-related protein Rab-7L1	NP_659124
Olfr651	-1033	chr7:104551701-104552000	299	0.00;0.00	4.47;3.46	-inf	0.00683591	0.573379	chr7	104552883	104553952	+	NM_146813	olfactory receptor 651	NP_667024
Olfr329-ps	108	chr11:58544621-58545040	419	0.00;0.00	4.47;3.46	-inf	0.00683591	0.573379	chr11	58544938	58542446	-	NM_001011531	olfactory receptor 329	NP_001011531
Ndufaf4	398	chr4:24898281-24898680	399	0.00;0.00	4.47;3.46	-inf	0.00683591	0.573379	chr4	24898082	24905001	+	NM_026742	NADH dehydrogenase [ubiquinone] 1 alpha subcomplex assembly factor 4	NP_081018
Meis2	-992	chr2:116065921-116066180	259	0.00;0.00	4.47;3.46	-inf	0.00683591	0.573379	chr2	116065058	115861263	-	NM_001159567	homeobox protein Meis2 isoform 3	NP_001153039
Krt72	1048	chr15:101785221-101785600	379	0.00;0.00	4.47;3.46	-inf	0.00683591	0.573379	chr15	101786458	101776559	-	NM_213728	keratin, type II cytoskeletal 72	NP_998893
Insrr	1360	chr3:87798121-87798500	379	0.00;0.00	4.47;3.46	-inf	0.00683591	0.573379	chr3	87796950	87816101	+	NM_011832	insulin receptor-related protein precursor	NP_035962
Gm3494	-1	chr14:5163461-5163820	359	0.00;0.00	4.47;3.46	-inf	0.00683591	0.573379	chr14	5163641	5170292	+	NM_001256885	predicted gene 3494	NP_001243814
Gm3317	-1	chr14:5163461-5163820	359	0.00;0.00	4.47;3.46	-inf	0.00683591	0.573379	chr14	5163641	5170292	+	NM_001242941	alpha21-takusan	NP_001229870
Gm14391	-1517	chr2:175867541-175867900	359	0.00;0.00	4.47;3.46	-inf	0.00683591	0.573379	chr2	175869237	175881883	+	NM_001099308	KRAB box and zinc finger, C2H2 type domain containing isoform 1	NP_001092778
Fat3	1571	chr9:16376481-16376840	359	0.00;0.00	4.47;3.46	-inf	0.00683591	0.573379	chr9	16378231	15910192	-	NM_001080814	protocadherin Fat 3 precursor	NP_001074283
Fam183b	-90	chr11:58801801-58802300	499	0.00;0.00	4.47;3.46	-inf	0.00683591	0.573379	chr11	58801960	58792801	-	NM_001162878	protein FAM183B isoform 2	NP_001156350
Cstf2	1342	chrX:134060461-134060920	459	0.00;0.00	4.47;3.46	-inf	0.00683591	0.573379	chrX	134059348	134086821	+	NM_133196	cleavage stimulation factor subunit 2	NP_573459
Cntnap2	795	chr6:47245021-47245360	339	0.00;0.00	4.47;3.46	-inf	0.00683591	0.573379	chr6	47244395	47301371	+	NM_025771	contactin-associated protein-like 2 isoform b	NP_080047
Bcl2a1a	-1419	chr9:88955381-88955620	239	0.00;0.00	4.47;3.46	-inf	0.00683591	0.573379	chr9	88956919	88962416	+	NM_009742	bcl-2-related protein A1	NP_033872
Aurka	496	chr2:172369821-172370200	379	0.00;0.00	4.47;3.46	-inf	0.00683591	0.573379	chr2	172370506	172356195	-	NM_011497	aurora kinase A	NP_035627
Arhgef4	1109	chr1:34802641-34803020	379	0.00;0.00	4.47;3.46	-inf	0.00683591	0.573379	chr1	34801721	34812754	+	NM_183019	rho guanine nucleotide exchange factor 4	NP_898840
Alcam	-1233	chr16:52454081-52454380	299	0.00;0.00	4.47;3.46	-inf	0.00683591	0.573379	chr16	52452997	52248995	-	NM_009655	CD166 antigen precursor	NP_033785
1600016N20Rik	1960	chr7:141211921-141212320	399	0.00;0.00	4.47;3.46	-inf	0.00683591	0.573379	chr7	141214080	141210042	-	NM_028050	uncharacterized protein C11orf35 homolog	NP_082326
Mob3c	849	chr4:115828721-115829160	439	4.42;2.28	8.93;12.99	-1.71	0.00693095	0.573379	chr4	115828091	115836183	+	NM_175308	MOB kinase activator 3C	NP_780517
Cntnap5b	-924	chr1:99771581-99772100	519	1.77;5.70	10.05;11.26	-1.51	0.0070116	0.573379	chr1	99772764	100485942	+	NM_172851	contactin-associated protein like 5-2 precursor	NP_766439
Arhgef2	-636	chr3:88615361-88615780	419	1.77;1.14	12.28;5.20	-2.59	0.00706153	0.573379	chr3	88616206	88648052	+	NM_001198911	rho guanine nucleotide exchange factor 2 isoform 2	NP_001185840
Crygc	1982	chr1:65071321-65071780	459	2.65;0.00	5.58;10.39	-2.59	0.0070936	0.573379	chr1	65073532	65071524	-	NM_007775	gamma-crystallin C isoform 1	NP_031801
Tsks	-1519	chr7:44941481-44941960	479	0.88;3.42	13.40;6.06	-2.18	0.00709773	0.573379	chr7	44943239	44958037	+	NM_001077591	testis-specific serine kinase substrate isoform 2	NP_001071059
Galp	1691	chr7:6198581-6198980	399	3.54;1.14	6.70;13.86	-2.14	0.00710119	0.573379	chr7	6197089	6216137	+	NM_178028	galanin-like peptide precursor	NP_821171
Zfp385a	-1644	chr15:103341601-103341860	259	0.00;0.00	2.23;5.20	-inf	0.00713756	0.573379	chr15	103340086	103313894	-	NM_013866	zinc finger protein 385A	NP_038894
Pinx1	-871	chr14:63859301-63859580	279	0.00;0.00	2.23;5.20	-inf	0.00713756	0.573379	chr14	63860311	63919859	+	NM_028228	PIN2/TERF1-interacting telomerase inhibitor 1	NP_082504
Leo1	987	chr9:75442401-75442620	219	0.00;0.00	2.23;5.20	-inf	0.00713756	0.573379	chr9	75441523	75466432	+	NM_001039522	RNA polymerase-associated protein LEO1	NP_001034611
Isca2	971	chr12:84774121-84774360	239	0.00;0.00	2.23;5.20	-inf	0.00713756	0.573379	chr12	84773269	84775089	+	NM_028863	iron-sulfur cluster assembly 2 homolog, mitochondrial precursor	NP_083139
Hypk	3	chr2:121456981-121457200	219	0.00;0.00	2.23;5.20	-inf	0.00713756	0.573379	chr2	121457087	121458440	+	NM_026318	huntingtin-interacting protein K	NP_080594
Gne	1017	chr4:44083001-44083320	319	0.00;0.00	2.23;5.20	-inf	0.00713756	0.573379	chr4	44084177	44034074	-	NM_015828	bifunctional UDP-N-acetylglucosamine 2-epimerase/N-acetylmannosamine kinase isoform 2	NP_056643
Gm5480	-1177	chr16:5005961-5006260	299	0.00;0.00	2.23;5.20	-inf	0.00713756	0.573379	chr16	5007287	5008308	+	NM_001253803	uncharacterized protein LOC432995 isoform 2	NP_001240732
Fam3b	786	chr16:97503961-97504340	379	0.00;0.00	2.23;5.20	-inf	0.00713756	0.573379	chr16	97504936	97471085	-	NM_020622	protein FAM3B precursor	NP_065647
Epb4.1l3	-1519	chr17:69155101-69155480	379	0.00;0.00	2.23;5.20	-inf	0.00713756	0.573379	chr17	69156809	69289987	+	NM_013813	band 4.1-like protein 3	NP_038841
Eid3	335	chr10:82866841-82867080	239	0.00;0.00	2.23;5.20	-inf	0.00713756	0.573379	chr10	82866625	82867929	+	NM_025499	EP300-interacting inhibitor of differentiation 3	NP_079775
Cbx8	-547	chr11:119041301-119041620	319	0.00;0.00	2.23;5.20	-inf	0.00713756	0.573379	chr11	119040913	119038435	-	NM_013926	chromobox protein homolog 8	NP_038954
Epha8	726	chr4:136955821-136956360	539	0.88;2.28	6.70;7.79	-2.2	0.00724888	0.573379	chr4	136956816	136929418	-	NM_007939	ephrin type-A receptor 8 precursor	NP_031965
Abtb1	35	chr6:88841581-88842220	639	1.77;1.14	8.93;6.06	-2.37	0.00724888	0.573379	chr6	88841935	88835913	-	NM_030251	ankyrin repeat and BTB/POZ domain-containing protein 1	NP_084527
Csl	-722	chr10:99760121-99760640	519	1.77;1.14	12.28;4.33	-2.51	0.00726799	0.573379	chr10	99759658	99757704	-	NM_027945	citrate synthase-like protein	NP_082221
Kank1	-1701	chr19:25235101-25235900	799	7.96;5.70	22.34;13.86	-1.41	0.00733797	0.573379	chr19	25237201	25434496	+	NM_181404	KN motif and ankyrin repeat domain-containing protein 1	NP_852069
Dcdc2b	-1973	chr4:129616041-129616420	379	0.88;0.00	3.35;8.66	-3.76	0.00737545	0.573379	chr4	129614257	129608330	-	NM_001195730	doublecortin domain-containing protein 2B	NP_001182659
Asb5	-490	chr8:54549661-54550020	359	0.88;0.00	3.35;8.66	-3.76	0.00737545	0.573379	chr8	54550330	54587836	+	NM_029569	ankyrin repeat and SOCS box protein 5	NP_083845
Aatk	1311	chr11:120040281-120040660	379	0.88;0.00	3.35;8.66	-3.76	0.00737545	0.573379	chr11	120041781	120007315	-	NM_001198787	serine/threonine-protein kinase LMTK1 isoform 1	NP_001185716
Tmem91	916	chr7:25673821-25674680	859	3.54;9.12	15.64;15.59	-1.3	0.00737591	0.573379	chr7	25675166	25669139	-	NM_177102	transmembrane protein 91	NP_796076
Ifitm2	801	chr7:140954781-140955540	759	5.31;1.14	13.40;9.53	-1.83	0.00751694	0.573379	chr7	140955961	140954838	-	NM_030694	interferon-induced transmembrane protein 2	NP_109619
Gm3286	-1590	chr5:95471561-95472340	779	7.08;2.28	15.64;12.12	-1.57	0.00767884	0.573379	chr5	95473540	95485105	+	NM_001167792	uncharacterized protein LOC100041354 isoform 2	NP_001161264
Chp2	1615	chr7:122220941-122221280	339	0.00;1.14	3.35;7.79	-3.29	0.00769321	0.573379	chr7	122219495	122222539	+	NM_027363	calcineurin B homologous protein 2	NP_081639
Rgs8	-1416	chr1:153651421-153651820	399	0.00;2.28	4.47;9.53	-2.62	0.00770275	0.573379	chr1	153653036	153697665	+	NM_026380	regulator of G-protein signaling 8	NP_080656
Mid1	-1391	chrX:169877961-169878500	539	3.54;1.14	8.93;8.66	-1.91	0.0077527	0.573379	chrX	169879621	169990797	+	NM_183151	midline-1	NP_898974
Rbm12	-545	chr2:156112141-156112880	739	2.65;2.28	8.93;8.66	-1.83	0.0077527	0.573379	chr2	156111965	156094881	-	NM_170598	RNA-binding protein 12	NP_733486
Cpne1	-545	chr2:156112141-156112880	739	2.65;2.28	8.93;8.66	-1.83	0.0077527	0.573379	chr2	156111965	156071840	-	NM_170590	copine-1	NP_733469
Zap70	1640	chr1:36763281-36763720	439	2.65;2.28	7.82;9.53	-1.81	0.0077527	0.573379	chr1	36761860	36782816	+	NM_009539	tyrosine-protein kinase ZAP-70	NP_033565
Uimc1	-1375	chr13:55101341-55102000	659	2.65;2.28	10.05;7.79	-1.85	0.0077527	0.573379	chr13	55100295	55027879	-	NM_011307	BRCA1-A complex subunit RAP80	NP_035437
Lctl	1844	chr9:64118721-64119260	539	1.77;3.42	8.93;8.66	-1.76	0.0077527	0.573379	chr9	64117146	64138118	+	NM_145835	lactase-like protein precursor	NP_665834
Nox4	-1264	chr7:87245341-87245720	379	0.00;1.14	7.82;2.60	-3.19	0.00808647	0.573379	chr7	87246794	87398606	+	NM_015760	NADPH oxidase 4	NP_056575
Slc22a3	-706	chr17:12508101-12508720	619	2.65;5.70	15.64;9.53	-1.59	0.00815931	0.573379	chr17	12507704	12419973	-	NM_011395	solute carrier family 22 member 3	NP_035525
Ada	-781	chr2:163750581-163751460	879	3.54;4.56	13.40;9.53	-1.5	0.00828789	0.573379	chr2	163750239	163726570	-	NM_007398	adenosine deaminase	NP_031424
Plcd3	1008	chr11:103100321-103100980	659	2.65;5.70	12.28;10.39	-1.44	0.00828789	0.573379	chr11	103101658	103070295	-	NM_152813	1-phosphatidylinositol 4,5-bisphosphate phosphodiesterase delta-3	NP_690026
Nkapl	1161	chr13:21466921-21467760	839	2.65;5.70	13.40;9.53	-1.46	0.00828789	0.573379	chr13	21468501	21467046	-	NM_025719	NFKB activating protein-like	NP_079995
Serpine1	-748	chr5:137072801-137073240	439	0.88;1.14	4.47;9.53	-2.79	0.00837683	0.573379	chr5	137072272	137061505	-	NM_008871	plasminogen activator inhibitor 1 precursor	NP_032897
Ezh1	-670	chr11:101226821-101227420	599	0.88;1.14	4.47;9.53	-2.79	0.00837683	0.573379	chr11	101226450	101191114	-	NM_007970	histone-lysine N-methyltransferase EZH1	NP_031996
Zfand6	1231	chr7:84677961-84678280	319	0.00;0.00	5.58;1.73	-inf	0.00842259	0.573379	chr7	84679351	84615053	-	NM_022985	AN1-type zinc finger protein 6	NP_075361
Vmn1r209	-32	chr13:22806421-22806680	259	0.00;0.00	5.58;1.73	-inf	0.00842259	0.573379	chr13	22806518	22805579	-	NM_001013787	vomeronasal 1 receptor 209	NP_001013809
Ubxn6	-1841	chr17:56076641-56077020	379	0.00;0.00	5.58;1.73	-inf	0.00842259	0.573379	chr17	56074989	56068252	-	NM_024432	UBX domain-containing protein 6	NP_077752
Tsn	-558	chr1:118311561-118311820	259	0.00;0.00	5.58;1.73	-inf	0.00842259	0.573379	chr1	118311132	118298517	-	NM_011650	translin	NP_035780
Tmem89	1732	chr9:108916221-108916480	259	0.00;0.00	5.58;1.73	-inf	0.00842259	0.573379	chr9	108914618	108915563	+	NM_027066	transmembrane protein 89 precursor	NP_081342
Stil	613	chr4:115000621-115000840	219	0.00;0.00	5.58;1.73	-inf	0.00842259	0.573379	chr4	115000117	115043198	+	NM_009185	SCL-interrupting locus protein homolog	NP_033211
Sox14	1440	chr9:99874561-99874900	339	0.00;0.00	5.58;1.73	-inf	0.00842259	0.573379	chr9	99876170	99874105	-	NM_011440	transcription factor SOX-14	NP_035570
Samd14	1862	chr11:95011621-95011860	239	0.00;0.00	5.58;1.73	-inf	0.00842259	0.573379	chr11	95009878	95026087	+	NM_146025	sterile alpha motif domain-containing protein 14 isoform 1	NP_666137
Rexo2	591	chr9:48479901-48480140	239	0.00;0.00	5.58;1.73	-inf	0.00842259	0.573379	chr9	48480611	48468513	-	NM_024233	oligoribonuclease, mitochondrial precursor	NP_077195
Rab34	803	chr11:78189421-78189680	259	0.00;0.00	5.58;1.73	-inf	0.00842259	0.573379	chr11	78188747	78192193	+	NM_033475	ras-related protein Rab-34	NP_258436
Pnpt1	1400	chr11:29131961-29132340	379	0.00;0.00	5.58;1.73	-inf	0.00842259	0.573379	chr11	29130750	29161828	+	NM_027869	polyribonucleotide nucleotidyltransferase 1, mitochondrial precursor	NP_082145
Pcx	1779	chr19:4512121-4512380	259	0.00;0.00	5.58;1.73	-inf	0.00842259	0.573379	chr19	4510471	4621752	+	NM_001162946	pyruvate carboxylase, mitochondrial isoform 1	NP_001156418
Ott	-1369	chrX:148313041-148313280	239	0.00;0.00	5.58;1.73	-inf	0.00842259	0.573379	chrX	148314529	148521446	+	NM_011022	ovary testis transcribed	NP_035152
Msantd3	1372	chr4:48541701-48542040	339	0.00;0.00	5.58;1.73	-inf	0.00842259	0.573379	chr4	48540498	48561920	+	NM_028137	myb/SANT-like DNA-binding domain-containing protein 3	NP_082413
Lrrtm4	-12	chr6:80019501-80019760	259	0.00;0.00	5.58;1.73	-inf	0.00842259	0.573379	chr6	80019642	80024932	+	NM_178731	leucine-rich repeat transmembrane neuronal protein 4 precursor	NP_848846
Igf2r	1066	chr17:12768541-12768740	199	0.00;0.00	5.58;1.73	-inf	0.00842259	0.573379	chr17	12769706	12682405	-	NM_010515	cation-independent mannose-6-phosphate receptor precursor	NP_034645
Hist1h4h	-923	chr13:23530021-23530220	199	0.00;0.00	5.58;1.73	-inf	0.00842259	0.573379	chr13	23531043	23531521	+	NM_153173	histone H4	NP_694813
Gpr6	-576	chr10:41072001-41072320	319	0.00;0.00	5.58;1.73	-inf	0.00842259	0.573379	chr10	41071584	41070492	-	NM_199058	G-protein coupled receptor 6	NP_951013
Gm20767	455	chr13:120140521-120140880	359	0.00;0.00	5.58;1.73	-inf	0.00842259	0.573379	chr13	120140245	120155335	+	NM_001039648	2-cell-stage, variable group, member 1-like	NP_001034737
Gm15085	-1369	chrX:148313041-148313280	239	0.00;0.00	5.58;1.73	-inf	0.00842259	0.573379	chrX	148314529	148521446	+	NM_001122734	predicted gene 15085	NP_001116206
Fpr2	917	chr17:17888601-17888880	279	0.00;0.00	5.58;1.73	-inf	0.00842259	0.573379	chr17	17887823	17893952	+	NM_008039	formyl peptide receptor 2	NP_032065
D10Wsu52e	983	chr10:85956641-85956980	339	0.00;0.00	5.58;1.73	-inf	0.00842259	0.573379	chr10	85957793	85938636	-	NM_145422	tRNA-splicing ligase RtcB homolog	NP_663397
Crygd	-1900	chr1:65065161-65065520	359	0.00;0.00	5.58;1.73	-inf	0.00842259	0.573379	chr1	65063440	65061837	-	NM_007776	gamma-crystallin D	NP_031802
Cep110	1629	chr2:35110941-35111300	359	0.00;0.00	5.58;1.73	-inf	0.00842259	0.573379	chr2	35109491	35178822	+	NM_012018	centriolin isoform 1	NP_036148
Arhgap32	-1838	chr9:32222241-32222580	339	0.00;0.00	5.58;1.73	-inf	0.00842259	0.573379	chr9	32224248	32265511	+	NM_177379	rho GTPase-activating protein 32 isoform 2	NP_796353
AA987161	-663	chr13:67610221-67610520	299	0.00;0.00	5.58;1.73	-inf	0.00842259	0.573379	chr13	67609707	67589438	-	NM_001163246	zinc finger protein	NP_001156718
Klf2	-1551	chr8:72317281-72317740	459	0.88;0.00	4.47;6.06	-3.57	0.00845198	0.573379	chr8	72319061	72321654	+	NM_008452	Krueppel-like factor 2	NP_032478
Parp4	852	chr14:56576241-56576700	459	0.00;1.14	4.47;6.06	-3.21	0.00845198	0.573379	chr14	56575618	56659798	+	NM_001145978	poly (ADP-ribose) polymerase family, member 4	NP_001139450
Lrmp	-1848	chr6:145119641-145120140	499	0.00;1.14	4.47;6.06	-3.21	0.00845198	0.573379	chr6	145121738	145174928	+	NM_008511	lymphoid-restricted membrane protein	NP_032537
Il17ra	-856	chr6:120461981-120462700	719	0.00;1.14	5.58;5.20	-3.24	0.00845198	0.573379	chr6	120463196	120483727	+	NM_008359	interleukin-17 receptor A precursor	NP_032385
Idua	-1915	chr5:108666981-108667400	419	0.00;1.14	5.58;5.20	-3.24	0.00845198	0.573379	chr5	108669105	108684558	+	NM_008325	alpha-L-iduronidase precursor	NP_032351
Thoc3	640	chr13:54467941-54468460	519	0.88;0.00	6.70;4.33	-3.64	0.00845198	0.573379	chr13	54468840	54458836	-	NM_028597	THO complex subunit 3	NP_082873
Lin37	806	chr7:30558641-30559040	399	0.88;0.00	6.70;4.33	-3.64	0.00845198	0.573379	chr7	30559646	30555440	-	NM_029377	protein lin-37 homolog	NP_083653
Krtap4-9	1541	chr11:99786621-99786860	239	0.88;0.00	6.70;4.33	-3.64	0.00845198	0.573379	chr11	99785199	99786257	+	NM_001085548	keratin associated protein 4 family member	NP_001079017
Ott	1739	chrX:149099501-149099880	379	1.77;0.00	3.35;10.39	-2.96	0.00852207	0.573379	chrX	149097951	149138152	+	NM_011022	ovary testis transcribed	NP_035152
Gm15085	1739	chrX:149099501-149099880	379	1.77;0.00	3.35;10.39	-2.96	0.00852207	0.573379	chrX	149097951	149138152	+	NM_001122734	predicted gene 15085	NP_001116206
Dmbt1	365	chr7:131031881-131033000	1119	23.00;9.12	37.97;31.18	-1.11	0.00858592	0.573379	chr7	131032075	131121628	+	NM_007769	deleted in malignant brain tumors 1 protein precursor	NP_031795
Igtp	1445	chr11:58200601-58201400	799	8.85;4.56	21.22;13.86	-1.39	0.00867042	0.573379	chr11	58199555	58207592	+	NM_018738	interferon gamma induced GTPase	NP_061208
Mall	-1523	chr2:127731201-127731640	439	2.65;0.00	5.58;9.53	-2.51	0.00874514	0.573379	chr2	127729897	127704389	-	NM_145532	MAL-like protein	NP_663507
Gas7	-1964	chr11:67594281-67594900	619	6.19;2.28	7.82;21.65	-1.8	0.00876468	0.573379	chr11	67596554	67688992	+	NM_001277080	growth arrest-specific protein 7 isoform d	NP_001264009
Ppbp	633	chr5:90768781-90769520	739	2.65;3.42	18.99;5.20	-1.99	0.00881209	0.573379	chr5	90768517	90770060	+	NM_023785	platelet basic protein precursor	NP_076274
Zmynd8	-1117	chr2:165859141-165859440	299	0.00;0.00	2.23;4.33	-inf	0.00884095	0.573379	chr2	165858173	165784151	-	NM_001252585	protein kinase C-binding protein 1 isoform 3	NP_001239514
Upf2	1772	chr2:5953081-5953400	319	0.00;0.00	2.23;4.33	-inf	0.00884095	0.573379	chr2	5951468	6056703	+	NM_001081132	regulator of nonsense transcripts 2	NP_001074601
Trim47	1775	chr11:116108301-116108620	319	0.00;0.00	2.23;4.33	-inf	0.00884095	0.573379	chr11	116110235	116105749	-	NM_172570	tripartite motif-containing protein 47 isoform 2	NP_766158
Tpte	580	chr8:22283861-22284180	319	0.00;0.00	2.23;4.33	-inf	0.00884095	0.573379	chr8	22283440	22371418	+	NM_199257	transmembrane phosphatase with tensin homology	NP_954866
Tprg	124	chr16:25286761-25287120	359	0.00;0.00	2.23;4.33	-inf	0.00884095	0.573379	chr16	25286816	25422344	+	NM_175165	tumor protein p63-regulated gene 1 protein	NP_780374
Tmem14a	-880	chr1:21217581-21217920	339	0.00;0.00	2.23;4.33	-inf	0.00884095	0.573379	chr1	21218630	21230167	+	NM_029398	transmembrane protein 14A	NP_083674
Tex13	-227	chrX:140813521-140813800	279	0.00;0.00	2.23;4.33	-inf	0.00884095	0.573379	chrX	140813433	140808306	-	NM_031381	testis expressed 13B	NP_113558
Sytl2	115	chr7:90380641-90380880	239	0.00;0.00	2.23;4.33	-inf	0.00884095	0.573379	chr7	90380645	90410439	+	NM_001040086	synaptotagmin-like protein 2 isoform 1	NP_001035175
Syne1	-143	chr10:5194661-5195040	379	0.00;0.00	2.23;4.33	-inf	0.00884095	0.573379	chr10	5194707	5020195	-	NM_001079686	nesprin-1 isoform 3	NP_001073154
Sv2b	-1698	chr7:75310821-75311100	279	0.00;0.00	2.23;4.33	-inf	0.00884095	0.573379	chr7	75309262	75114894	-	NM_153579	synaptic vesicle glycoprotein 2B	NP_705807
Spg11	1016	chr2:122117181-122117560	379	0.00;0.00	2.23;4.33	-inf	0.00884095	0.573379	chr2	122118386	122053525	-	NM_145531	spatacsin	NP_663506
Snap29	-1039	chr16:17404861-17405060	199	0.00;0.00	2.23;4.33	-inf	0.00884095	0.573379	chr16	17405999	17430826	+	NM_023348	synaptosomal-associated protein 29	NP_075837
Sema6a	1368	chr18:47367401-47367600	199	0.00;0.00	2.23;4.33	-inf	0.00884095	0.573379	chr18	47368868	47245253	-	NM_018744	semaphorin-6A precursor	NP_061214
Scgb1b30	200	chr7:34095441-34095820	379	0.00;0.00	2.23;4.33	-inf	0.00884095	0.573379	chr7	34095430	34100837	+	NM_001099330	androgen binding protein (Abp) family member precursor	NP_001092800
S100a2	-786	chr3:90589361-90589560	199	0.00;0.00	2.23;4.33	-inf	0.00884095	0.573379	chr3	90590246	90591508	+	NM_001195760	predicted gene, EG628324	NP_001182689
Pus7	-1099	chr5:23784581-23784940	359	0.00;0.00	2.23;4.33	-inf	0.00884095	0.573379	chr5	23783661	23740695	-	NM_178403	pseudouridylate synthase 7 homolog	NP_848490
Psap	-1047	chr10:60276481-60276680	199	0.00;0.00	2.23;4.33	-inf	0.00884095	0.573379	chr10	60277627	60302600	+	NM_001146123	sulfated glycoprotein 1 isoform E preproprotein	NP_001139595
Prmt6	1828	chr3:110249021-110249320	299	0.00;0.00	2.23;4.33	-inf	0.00884095	0.573379	chr3	110250998	110248545	-	NM_178891	protein arginine N-methyltransferase 6	NP_849222
Prl3a1	-438	chr13:27258941-27259160	219	0.00;0.00	2.23;4.33	-inf	0.00884095	0.573379	chr13	27259488	27276660	+	NM_025896	prolactin family 3, subfamily a, member 1 precursor	NP_080172
Pls1	1759	chr9:95843401-95843640	239	0.00;0.00	2.23;4.33	-inf	0.00884095	0.573379	chr9	95845279	95752641	-	NM_001033210	plastin-1	NP_001028382
Osbpl7	701	chr11:97051421-97051620	199	0.00;0.00	2.23;4.33	-inf	0.00884095	0.573379	chr11	97050819	97068904	+	NM_001081434	oxysterol-binding protein-related protein 7	NP_001074903
Olfr1094	-85	chr2:86828421-86828760	339	0.00;0.00	2.23;4.33	-inf	0.00884095	0.573379	chr2	86828675	86829822	+	NM_146365	olfactory receptor 1094	NP_666477
Nov	-1667	chr15:54744141-54744380	239	0.00;0.00	2.23;4.33	-inf	0.00884095	0.573379	chr15	54745927	54753761	+	NM_010930	protein NOV homolog precursor	NP_035060
Nipsnap1	278	chr11:4874101-4874460	359	0.00;0.00	2.23;4.33	-inf	0.00884095	0.573379	chr11	4874002	4894200	+	NM_008698	protein NipSnap homolog 1	NP_032724
Mrpl52	-518	chr14:54426201-54426580	379	0.00;0.00	2.23;4.33	-inf	0.00884095	0.573379	chr14	54426908	54429750	+	NM_026851	39S ribosomal protein L52, mitochondrial precursor	NP_081127
Ins2	-292	chr7:142679881-142680120	239	0.00;0.00	2.23;4.33	-inf	0.00884095	0.573379	chr7	142679708	142678655	-	NM_001185084	insulin-2 preproprotein	NP_001172013
Hist2h4	-1843	chr3:96265001-96265320	319	0.00;0.00	2.23;4.33	-inf	0.00884095	0.573379	chr3	96263317	96262969	-	NM_033596	histone H4	NP_291074
Hexa	-1596	chr9:59537881-59538260	379	0.00;0.00	2.23;4.33	-inf	0.00884095	0.573379	chr9	59539666	59565105	+	NM_010421	beta-hexosaminidase subunit alpha precursor	NP_034551
H2-T23	91	chr17:36032461-36032760	299	0.00;0.00	2.23;4.33	-inf	0.00884095	0.573379	chr17	36032701	36029976	-	NM_010398	H-2 class I histocompatibility antigen, D-37 alpha chain precursor	NP_034528
Gm8898	-1851	chr2:175370481-175370740	259	0.00;0.00	2.23;4.33	-inf	0.00884095	0.573379	chr2	175372461	175385279	+	NM_001177407	KRAB box and zinc finger C2H2 type domain containing protein isoform 1	NP_001170878
Gm4788	-701	chr1:139781781-139782100	319	0.00;0.00	2.23;4.33	-inf	0.00884095	0.573379	chr1	139781239	139697918	-	NM_001160304	complement factor H-related protein C isoform 3 precursor	NP_001153776
Gm14431	-1851	chr2:175370481-175370740	259	0.00;0.00	2.23;4.33	-inf	0.00884095	0.573379	chr2	175372461	175385279	+	NM_001177406	KRAB box and zinc finger C2H2 type domain containing protein isoform 1	NP_001170877
Gm14420	-671	chr2:177463881-177464260	379	0.00;0.00	2.23;4.33	-inf	0.00884095	0.573379	chr2	177464741	177479194	+	NM_001177568	KRAB box and zinc finger C2H2 type domain containing protein-like	NP_001171039
Gli2	1239	chr1:119052241-119052520	279	0.00;0.00	2.23;4.33	-inf	0.00884095	0.573379	chr1	119053619	118834060	-	NM_001081125	zinc finger protein GLI2	NP_001074594
Ephx2	832	chr14:66123521-66123860	339	0.00;0.00	2.23;4.33	-inf	0.00884095	0.573379	chr14	66124522	66084371	-	NM_001271402	bifunctional epoxide hydrolase 2 isoform b	NP_001258331
Elane	1459	chr10:79887621-79887920	299	0.00;0.00	2.23;4.33	-inf	0.00884095	0.573379	chr10	79886311	79888216	+	NM_015779	neutrophil elastase precursor	NP_056594
Dlg3	-1064	chrX:100773301-100773560	259	0.00;0.00	2.23;4.33	-inf	0.00884095	0.573379	chrX	100774494	100818410	+	NM_001177779	disks large homolog 3 isoform 3	NP_001171250
Cxxc1	959	chr18:74217061-74217280	219	0.00;0.00	2.23;4.33	-inf	0.00884095	0.573379	chr18	74216211	74221491	+	NM_028868	cpG-binding protein	NP_083144
Crbn	1537	chr6:106798441-106798660	219	0.00;0.00	2.23;4.33	-inf	0.00884095	0.573379	chr6	106800087	106778244	-	NM_175357	protein cereblon isoform 2	NP_780566
Cldn23	-951	chr8:35827321-35827700	379	0.00;0.00	2.23;4.33	-inf	0.00884095	0.573379	chr8	35826559	35824708	-	NM_027998	claudin-23	NP_082274
Ccdc177	1815	chr12:80758781-80759020	239	0.00;0.00	2.23;4.33	-inf	0.00884095	0.573379	chr12	80760715	80755446	-	NM_001008423	coiled-coil domain-containing protein 177	NP_001008423
Ccdc121	241	chr1:181511041-181511380	339	0.00;0.00	2.23;4.33	-inf	0.00884095	0.573379	chr1	181511451	181509632	-	NM_207280	coiled-coil domain containing 121	NP_997163
BC049715	358	chr6:136829041-136829360	319	0.00;0.00	2.23;4.33	-inf	0.00884095	0.573379	chr6	136828842	136840557	+	NM_178776	uncharacterized protein C12orf60 homolog	NP_848891
Asprv1	-783	chr6:86627201-86627580	379	0.00;0.00	2.23;4.33	-inf	0.00884095	0.573379	chr6	86628173	86629704	+	NM_026414	retroviral-like aspartic protease 1 precursor	NP_080690
Ank3	-341	chr10:69925081-69925300	219	0.00;0.00	2.23;4.33	-inf	0.00884095	0.573379	chr10	69925531	70027436	+	NM_170687	ankyrin-3 isoform f	NP_733788
AI464131	-975	chr4:41503861-41504240	379	0.00;0.00	2.23;4.33	-inf	0.00884095	0.573379	chr4	41503075	41495600	-	NM_001085515	uncharacterized family 31 glucosidase KIAA1161	NP_001078984
6430531B16Rik	-315	chr7:139978921-139979220	299	0.00;0.00	2.23;4.33	-inf	0.00884095	0.573379	chr7	139978755	139972302	-	NM_001033465	uncharacterized protein LOC381933	NP_001028637
Alg13	285	chrX:144318081-144318420	339	0.00;1.14	3.35;6.06	-3.05	0.00884581	0.573379	chrX	144317965	144325197	+	NM_026247	UDP-N-acetylglucosamine transferase subunit ALG13 homolog	NP_080523
Lor	142	chr3:92082821-92083180	359	0.88;0.00	7.82;2.60	-3.56	0.00887267	0.573379	chr3	92083142	92080270	-	NM_008508	loricrin	NP_032534
Hnrpll	-656	chr17:80062801-80063180	379	0.88;0.00	7.82;2.60	-3.56	0.00887267	0.573379	chr17	80062334	80029486	-	NM_144802	heterogeneous nuclear ribonucleoprotein L-like	NP_659051
Caprin2	196	chr6:148895741-148896120	379	0.88;0.00	7.82;2.60	-3.56	0.00887267	0.573379	chr6	148896126	148842511	-	NM_181541	caprin-2	NP_853519
Brf2	-1978	chr8:27130421-27130800	379	0.88;0.00	7.82;2.60	-3.56	0.00887267	0.573379	chr8	27128632	27123831	-	NM_025686	transcription factor IIIB 50 kDa subunit	NP_079962
2310010M20Rik	382	chr16:32271801-32272180	379	0.88;0.00	7.82;2.60	-3.56	0.00887267	0.573379	chr16	32271608	32274779	+	NM_183283	uncharacterized protein C3orf43 homolog	NP_899106
Vmn1r214	-897	chr13:23033161-23033720	559	2.65;0.00	6.70;6.93	-2.36	0.00897605	0.573379	chr13	23034337	23035441	+	NM_134214	vomeronasal 1 receptor 214	NP_598975
Atp6v0c	-1371	chr17:24170541-24171060	519	1.77;1.14	5.58;7.79	-2.2	0.00897605	0.573379	chr17	24169429	24163865	-	NM_009729	V-type proton ATPase 16 kDa proteolipid subunit	NP_033859
Kit	-1906	chr5:75572901-75573260	359	0.88;2.28	7.82;6.06	-2.13	0.00897605	0.573379	chr5	75574986	75656721	+	NM_001122733	mast/stem cell growth factor receptor Kit isoform 1 precursor	NP_001116205
Sult2a4	-1952	chr7:13991221-13991860	639	2.65;1.14	12.28;6.06	-2.27	0.00905352	0.573379	chr7	13989588	13909676	-	NM_001101534	sulfotransferase family member-like	NP_001095004
Gpr141	-1673	chr13:19825581-19826280	699	3.54;2.28	7.82;11.26	-1.71	0.00907296	0.573379	chr13	19824257	19749681	-	NM_181754	probable G-protein coupled receptor 141	NP_861419
Pdk1	1079	chr2:71874021-71874680	659	3.54;2.28	8.93;10.39	-1.73	0.00907296	0.573379	chr2	71873271	71903858	+	NM_172665	pyruvate dehydrogenase kinase, isozyme 1 precursor	NP_766253
Sult2a1	-150	chr7:13837301-13837820	519	1.77;4.56	8.93;10.39	-1.61	0.00907296	0.573379	chr7	13837410	13796245	-	NM_001111296	bile salt sulfotransferase 1	NP_001104766
4931429L15Rik	-1294	chr9:46321001-46321560	559	1.77;4.56	8.93;10.39	-1.61	0.00907296	0.573379	chr9	46319986	46303360	-	NM_183104	uncharacterized protein LOC74361	NP_898927
Ankmy2	1867	chr12:36158721-36159260	539	3.54;2.28	11.17;8.66	-1.77	0.00907296	0.573379	chr12	36157123	36197291	+	NM_146033	ankyrin repeat and MYND domain-containing protein 2	NP_666145
Zfp59	757	chr7:27839101-27839580	479	2.65;3.42	10.05;9.53	-1.69	0.00907296	0.573379	chr7	27838583	27856774	+	NM_011762	zinc finger protein 59	NP_035892
Klk1b16	-1416	chr7:44135161-44135540	379	0.88;0.00	3.35;6.93	-3.54	0.00931453	0.573379	chr7	44136766	44141604	+	NM_008454	kallikrein 1-related peptidase b16 precursor	NP_032480
Trap1a	668	chrX:139334161-139334540	379	0.88;0.00	3.35;6.06	-3.41	0.00937108	0.573379	chrX	139333682	139338165	+	NM_011635	tumor rejection antigen P815A	NP_035765
Pfkm	911	chr15:98112781-98113160	379	0.88;0.00	3.35;6.06	-3.41	0.00937108	0.573379	chr15	98112059	98132447	+	NM_021514	6-phosphofructokinase, muscle type	NP_067489
P2ry4	1279	chrX:100593421-100593760	339	0.88;0.00	3.35;6.06	-3.41	0.00937108	0.573379	chrX	100594869	100590153	-	NM_020621	P2Y purinoceptor 4	NP_065646
Nkpd1	-760	chr7:19517781-19518160	379	0.88;0.00	3.35;6.06	-3.41	0.00937108	0.573379	chr7	19518730	19525050	+	NM_027116	NTPase KAP family P-loop domain-containing protein 1	NP_081392
Nek4	1563	chr14:30952861-30953240	379	0.88;0.00	3.35;6.06	-3.41	0.00937108	0.573379	chr14	30951487	30987401	+	NM_011849	serine/threonine-protein kinase Nek4	NP_035979
Ankrd13c	-1325	chr3:157945961-157946320	359	0.88;0.00	3.35;6.06	-3.41	0.00937108	0.573379	chr3	157947465	158006837	+	NM_001013806	ankyrin repeat domain-containing protein 13C	NP_001013828

## Sheet: Ethanol+Stress (Hyper)
Column legend
GeneName	gene symbol for the DMR-associated gene
DMR_To_TSS	distance from middle position of DMR to transcription start site
DMR_Locus	genomic location of DMR
DMR_Length	bp length of DMR
Ethanol_Stress_Count	normalized tag counts in DMR for each Ethanol + Stress sample
Control_Count	normalized tag counts in DMR for each Control sample
log2FC	fold change (log2 transformed) of normalized tag counts between Ethanol + Stress and Control groups
p-value	p-value of the DMR
q-value	BH FDR-corrected p-value of the DMR
Genechrom	chromosome of DMR-associated gene
GeneTSS	transcription start site of DMR-associated gene
GeneTTS	transcription termination site of DMR-associated gene
Strand	transcriptional direction of DMR-associated gene
Accession	DMR-associated gene accession number
ProteinName	name of DMR-associated gene product
ProteinID	protein identifier of DMR-associated gene product
GeneName	DMR_To_TSS	DMR_Locus	DMR_Length	Ethanol_Stress_Count	Control_Count	log2FC	p-value	q-value	Genechrom	GeneTSS	GeneTTS	Strand	Accession	ProteinName	ProteinID
Trem2	1970	chr17:48348121-48348620	499	9.73;11.40	1.12;0.00	4.24	4.21472e-06	0.0610721	chr17	48346400	48352276	+	NM_031254	triggering receptor expressed on myeloid cells 2 isoform 1 precursor	NP_112544
1700010B08Rik	-624	chr2:173718421-173719160	739	17.69;14.82	1.12;4.33	2.58	4.3451e-06	0.0620975	chr2	173719414	173722086	+	NM_029308	uncharacterized protein LOC75485	NP_083584
Eya2	386	chr2:165630341-165631120	779	29.19;25.07	10.05;8.66	1.54	1.29052e-05	0.11379	chr2	165630344	165771727	+	NM_001271962	eyes absent homolog 2	NP_001258891
Olfr592	418	chr7:103186741-103187300	559	13.27;13.68	2.23;2.60	2.48	2.03031e-05	0.14261	chr7	103186602	103187541	+	NM_207556	olfactory receptor 592	NP_997439
Vmn2r47	-1706	chr7:9573621-9574300	679	14.15;9.12	2.23;0.00	3.38	2.1028e-05	0.143483	chr7	9572254	9547710	-	NM_001105151	vomeronasal 2, receptor 47 precursor	NP_001098621
Gsdmcl1	-678	chr15:63846141-63847120	979	34.50;42.17	17.87;15.59	1.2	3.30787e-05	0.18181	chr15	63847308	63850942	+	NM_001167581	gasdermin C-like 1	NP_001161053
Usp6nl	-825	chr2:6351521-6352300	779	11.50;9.12	2.23;0.87	2.73	3.79215e-05	0.188436	chr2	6352735	6443820	+	NM_181399	USP6 N-terminal-like protein isoform a	NP_852064
Hspg2	1658	chr4:137470181-137470740	559	7.08;6.84	0.00;0.00	inf	4.66386e-05	0.206055	chr4	137468802	137570630	+	NM_008305	basement membrane-specific heparan sulfate proteoglycan core protein precursor	NP_032331
Lilrb3	-908	chr7:3720961-3721620	659	8.85;12.54	1.12;1.73	2.91	5.71876e-05	0.222323	chr7	3720382	3712504	-	NM_011095	leukocyte immunoglobulin-like receptor subfamily B member 3 precursor	NP_035225
Oscp1	1566	chr4:126059881-126060380	499	8.85;10.26	2.23;0.00	3.1	6.90822e-05	0.245111	chr4	126058564	126089334	+	NM_172701	protein OSCP1	NP_766289
Gnas	311	chr2:174284241-174285020	779	47.77;33.05	20.10;12.12	1.33	8.25988e-05	0.261591	chr2	174284319	174338084	+	NM_019690	protein NESP55 isoform NESP55	NP_062664
Hils1	1510	chr11:94968941-94969400	459	12.38;13.68	4.47;0.00	2.54	8.35722e-05	0.261591	chr11	94967660	94968456	+	NM_018792	spermatid-specific linker histone H1-like protein	NP_061262
Acot11	1341	chr4:106798261-106798720	459	7.96;11.40	2.23;0.00	3.12	8.75406e-05	0.261591	chr4	106799831	106744560	-	NM_025590	acyl-coenzyme A thioesterase 11	NP_079866
Relt	1133	chr7:100862001-100862560	559	7.08;5.70	0.00;0.00	inf	9.08961e-05	0.261591	chr7	100863413	100845847	-	NM_177073	tumor necrosis factor receptor superfamily member 19L precursor	NP_796047
Lrrfip1	-506	chr1:90997981-90998460	479	7.08;5.70	0.00;0.00	inf	9.08961e-05	0.261591	chr1	90998726	91128944	+	NM_001111312	leucine-rich repeat flightless-interacting protein 1 isoform 3	NP_001104782
Tyms	-1615	chr5:30075081-30075400	319	5.31;7.98	0.00;0.00	inf	0.000103604	0.279686	chr5	30073625	30058199	-	NM_021288	thymidylate synthase	NP_067263
B020004J07Rik	-1438	chr4:101845261-101845660	399	8.85;6.84	0.00;0.87	4.18	0.000108994	0.279686	chr4	101844022	101834968	-	NM_001033790	uncharacterized protein LOC545662	NP_001028962
Slco1b2	1823	chr6:141631101-141631580	479	8.85;10.26	0.00;2.60	2.88	0.000126089	0.290472	chr6	141629517	141686635	+	NM_020495	solute carrier organic anion transporter family member 1B2 isoform 1	NP_065241
LOC100861978	-1399	chr4:42154861-42155840	979	76.07;55.85	21.22;33.77	1.26	0.000180636	0.34244	chr4	42156749	42158846	+	NM_001267703	c-C motif chemokine 27-like isoform 2	NP_001254632
Gm2506	-1399	chr4:42154861-42155840	979	76.07;55.85	21.22;33.77	1.26	0.000180636	0.34244	chr4	42156749	42158846	+	NM_001199966	chemokine (C-C motif) ligand 27b isoform 3	NP_001186895
Gm13306	-1399	chr4:42154861-42155840	979	76.07;55.85	21.22;33.77	1.26	0.000180636	0.34244	chr4	42156749	42158846	+	NM_001199963	chemokine (C-C motif) ligand 27b isoform 3	NP_001186892
Ccl27b	-1399	chr4:42154861-42155840	979	76.07;55.85	21.22;33.77	1.26	0.000180636	0.34244	chr4	42156749	42158846	+	NM_001199960	chemokine (C-C motif) ligand 27b isoform 3	NP_001186889
Tpp1	-1223	chr7:105753221-105753640	419	7.08;4.56	0.00;0.00	inf	0.000226504	0.348854	chr7	105752207	105744846	-	NM_009906	tripeptidyl-peptidase 1 precursor	NP_034036
Klrc3	-1582	chr6:129644701-129645040	339	7.08;4.56	0.00;0.00	inf	0.000226504	0.348854	chr6	129643288	129639084	-	NM_021378	killer cell lectin-like receptor subfamily C, member 3	NP_067353
Apobec3	853	chr15:79893061-79893460	399	7.96;9.12	1.12;0.87	3.11	0.000236473	0.352869	chr15	79892407	79908429	+	NM_030255	DNA dC->dU-editing enzyme APOBEC-3 isoform 2	NP_084531
Serpina1b	909	chr12:103737061-103737500	439	10.61;10.26	2.23;1.73	2.4	0.000263814	0.36755	chr12	103738189	103728155	-	NM_009244	alpha-1-antitrypsin 1-2 precursor	NP_033270
1700023F06Rik	-1172	chr11:103209361-103210100	739	7.08;10.26	0.00;1.73	3.32	0.000271144	0.368347	chr11	103208558	103198946	-	NM_027082	uncharacterized protein LOC69441 isoform 2	NP_081358
Cd1d1	1170	chr3:86998001-86998340	339	3.54;10.26	0.00;0.00	inf	0.000275936	0.368347	chr3	86999340	86995835	-	NM_007639	antigen-presenting glycoprotein CD1d1 precursor	NP_031665
Rbmy	-1969	chrY:2828521-2828900	379	1.77;11.40	0.00;0.00	inf	0.000357039	0.401346	chrY	2830679	2841858	+	NM_001166384	RNA-binding motif protein, Y chromosome, family 1 member A1	NP_001159856
Gm21708	-1969	chrY:2828521-2828900	379	1.77;11.40	0.00;0.00	inf	0.000357039	0.401346	chrY	2830679	2841858	+	NM_001270516	predicted gene, 21708	NP_001257445
Gm21677	-1969	chrY:2828521-2828900	379	1.77;11.40	0.00;0.00	inf	0.000357039	0.401346	chrY	2830679	2841858	+	NM_001270513	predicted gene, 21677	NP_001257442
Zmynd10	-1439	chr9:107545681-107546060	379	6.19;4.56	0.00;0.00	inf	0.000368047	0.401346	chr9	107547309	107551319	+	NM_053253	zinc finger MYND domain-containing protein 10	NP_444483
Slc19a2	-1875	chr1:164246941-164247400	459	6.19;4.56	0.00;0.00	inf	0.000368047	0.401346	chr1	164249045	164265385	+	NM_054087	thiamine transporter 1 isoform a	NP_473428
Arc	1400	chr15:74670961-74671380	419	6.19;4.56	0.00;0.00	inf	0.000368047	0.401346	chr15	74672570	74669080	-	NM_018790	activity-regulated cytoskeleton-associated protein	NP_061260
Adssl1	1944	chr12:112621801-112622180	379	6.19;4.56	0.00;0.00	inf	0.000368047	0.401346	chr12	112620046	112641355	+	NM_007421	adenylosuccinate synthetase isozyme 1	NP_031447
P2rx1	-174	chr11:72998741-72999200	459	5.31;5.70	0.00;0.00	inf	0.000368047	0.401346	chr11	72999144	73015197	+	NM_008771	P2X purinoceptor 1	NP_032797
Olfr583	1661	chr7:103052701-103053220	519	5.31;5.70	0.00;0.00	inf	0.000368047	0.401346	chr7	103051299	103052259	+	NM_146757	olfactory receptor 583	NP_666968
Clic3	1468	chr2:25458021-25458600	579	23.00;15.96	3.35;7.79	1.81	0.000368706	0.401346	chr2	25456842	25458772	+	NM_027085	chloride intracellular channel protein 3	NP_081361
Fam81a	-1593	chr9:70142941-70143360	419	4.42;6.84	0.00;0.00	inf	0.000383973	0.401346	chr9	70141557	70089309	-	NM_029784	protein FAM81A	NP_084060
Ppm1j	1955	chr3:104782761-104783260	499	8.85;5.70	0.00;0.87	4.07	0.00038763	0.401346	chr3	104781055	104786017	+	NM_027982	protein phosphatase 1J	NP_082258
Fam20b	-1660	chr1:156720361-156720780	419	6.19;10.26	0.00;0.87	4.25	0.000392229	0.401346	chr1	156718910	156678570	-	NM_145413	glycosaminoglycan xylosylkinase	NP_663388
Rhox4f	956	chrX:37606521-37606940	419	7.08;6.84	1.12;0.00	3.64	0.000395904	0.401346	chrX	37607686	37602894	-	NM_001039696	reproductive homeobox 4F	NP_001034785
C9	1018	chr15:6446121-6446580	459	7.08;6.84	1.12;0.00	3.64	0.000395904	0.401346	chr15	6445332	6498476	+	NM_013485	complement component C9 precursor	NP_038513
Slc22a20	-1287	chr19:5987181-5987680	499	7.96;9.12	1.12;1.73	2.58	0.000413231	0.401346	chr19	5986143	5970233	-	NM_198650	solute carrier family 22 member 20	NP_941052
Gm13139	-482	chr4:145780661-145781460	799	23.88;21.66	12.28;6.06	1.31	0.000466542	0.423698	chr4	145781542	145829939	+	NM_001083918	uncharacterized protein LOC666532	NP_001077387
Bckdhb	530	chr9:83948921-83949700	779	22.11;22.80	6.70;10.39	1.39	0.000466907	0.423698	chr9	83948780	84124240	+	NM_199195	2-oxoisovalerate dehydrogenase subunit beta, mitochondrial	NP_954665
Ap3b2	-1415	chr7:81494781-81495900	1119	32.73;23.93	11.17;12.12	1.28	0.000480977	0.4311	chr7	81493925	81460398	-	NM_021492	AP-3 complex subunit beta-2	NP_067467
Abr	777	chr11:76576701-76577200	499	13.27;12.54	2.23;4.33	1.98	0.000483942	0.4311	chr11	76577727	76416733	-	NM_198894	active breakpoint cluster region-related protein isoform 2	NP_942597
Mrps2	1175	chr2:28468901-28469580	679	19.46;15.96	8.93;3.46	1.51	0.0004851	0.4311	chr2	28468065	28471177	+	NM_080452	28S ribosomal protein S2, mitochondrial isoform 1	NP_536700
Galnt13	1504	chr2:54437681-54438100	419	11.50;10.26	4.47;0.87	2.03	0.000487669	0.4311	chr2	54436386	55117744	+	NM_173030	polypeptide N-acetylgalactosaminyltransferase 13	NP_766618
Cldn5	-656	chr16:18775901-18776480	579	10.61;10.26	3.35;1.73	2.04	0.000533619	0.446749	chr16	18776846	18778262	+	NM_013805	claudin-5	NP_038833
Flrt1	429	chr19:7104961-7105640	679	9.73;11.40	2.23;2.60	2.13	0.000533619	0.446749	chr19	7105729	7092010	-	NM_201411	fibronectin leucine rich transmembrane protein 1	NP_958813
Mon1b	1232	chr8:113636721-113637340	619	21.23;17.10	4.47;9.53	1.45	0.00057043	0.447553	chr8	113635798	113645179	+	NM_173015	vacuolar fusion protein MON1 homolog B	NP_766603
Amy2a5	-931	chr3:113259221-113260040	819	63.69;68.39	14.52;47.63	1.09	0.00063023	0.46066	chr3	113258699	113249177	-	NM_001042711	pancreatic alpha-amylase precursor	NP_001036176
Duxbl3	1566	chr14:25984121-25985020	899	41.57;21.66	15.64;10.39	1.28	0.000669718	0.46066	chr14	25983004	25990166	+	NM_001177539	double homeobox B-like	NP_001171010
Duxbl2	1566	chr14:25984121-25985020	899	41.57;21.66	15.64;10.39	1.28	0.000669718	0.46066	chr14	25983004	25990166	+	NM_001177538	double homeobox B-like	NP_001171009
Duxbl1	1566	chr14:25984121-25985020	899	41.57;21.66	15.64;10.39	1.28	0.000669718	0.46066	chr14	25983004	25989832	+	NM_183389	double homeobox B-like 1	NP_899245
Shq1	1697	chr6:100669241-100669680	439	7.08;6.84	0.00;1.73	3.01	0.000708879	0.46066	chr6	100671157	100573081	-	NM_181590	protein SHQ1 homolog	NP_853621
Gm7861	-943	chr8:21457141-21457780	639	7.08;6.84	0.00;1.73	3.01	0.000708879	0.46066	chr8	21456517	21455538	-	NM_001177526	predicted gene 7861 precursor	NP_001170997
Gm7849	-943	chr8:21457141-21457780	639	7.08;6.84	0.00;1.73	3.01	0.000708879	0.46066	chr8	21456517	21455426	-	NM_001177518	predicted gene, EG665927 precursor	NP_001170989
Fbxl18	-402	chr5:142895421-142895860	439	6.19;7.98	0.00;1.73	3.03	0.000708879	0.46066	chr5	142895238	142871788	-	NM_001033312	F-box and leucine-rich repeat protein 18	NP_001028484
Gm3500	1334	chr14:5387441-5388040	599	7.08;6.84	2.23;0.00	2.64	0.000708879	0.46066	chr14	5389074	5365791	-	NM_001256886	predicted gene 3468	NP_001243815
Pik3cd	889	chr4:149700361-149701120	759	18.58;15.96	6.70;6.06	1.44	0.000752205	0.46066	chr4	149701629	149649167	-	NM_001029837	phosphatidylinositol 4,5-bisphosphate 3-kinase catalytic subunit delta isoform isoform b	NP_001025008
P2rx7	1470	chr5:122645141-122645620	479	23.00;14.82	4.47;6.93	1.73	0.000775228	0.46066	chr5	122643910	122655260	+	NM_001038887	P2X purinoceptor 7 isoform d	NP_001033976
Hoxc13	1870	chr15:102922801-102923200	399	6.19;6.84	0.00;0.87	3.91	0.000775732	0.46066	chr15	102921130	102928814	+	NM_010464	homeobox protein Hox-C13	NP_034594
Osmr	-1087	chr15:6875081-6875720	639	5.31;7.98	0.00;0.87	3.94	0.000775732	0.46066	chr15	6874313	6813576	-	NM_011019	oncostatin-M-specific receptor subunit beta precursor	NP_035149
Mrvi1	-1195	chr7:110983001-110983580	579	5.31;7.98	0.00;0.87	3.94	0.000775732	0.46066	chr7	110982095	110868266	-	NM_194464	protein MRVI1 isoform b	NP_919446
Tekt4	771	chr17:25472181-25472540	359	5.31;4.56	0.00;0.00	inf	0.000775807	0.46066	chr17	25471589	25476594	+	NM_027951	tektin-4	NP_082227
Phf19	-314	chr2:34914101-34914480	379	5.31;4.56	0.00;0.00	inf	0.000775807	0.46066	chr2	34913976	34893754	-	NM_028716	PHD finger protein 19	NP_082992
Samd5	1998	chr10:9672981-9673440	459	4.42;5.70	0.00;0.00	inf	0.000775808	0.46066	chr10	9675208	9627258	-	NM_177271	sterile alpha motif domain-containing protein 5	NP_796245
Steap4	399	chr5:7960681-7961060	379	2.65;9.12	0.00;0.00	inf	0.000782124	0.46066	chr5	7960471	7982213	+	NM_054098	metalloreductase STEAP4	NP_473439
Specc1	1404	chr11:62078261-62078740	479	6.19;9.12	0.00;1.73	3.14	0.000798599	0.46066	chr11	62077096	62223013	+	NM_001029936	cytospin-B	NP_001025107
Spag11b	442	chr8:19140981-19141420	439	7.96;10.26	3.35;0.87	2.11	0.000846722	0.46066	chr8	19140758	19143010	+	NM_001034905	sperm associated antigen 11B isoform h precursor	NP_001030077
Xlr3a	-545	chrX:73097401-73097880	479	9.73;12.54	2.23;3.46	1.97	0.000911387	0.469768	chrX	73097095	73086292	-	NM_001110784	X-linked lymphocyte-regulated protein 3A	NP_001104254
Sema3f	-1065	chr9:107711341-107711740	399	4.42;10.26	1.12;0.00	3.72	0.000960737	0.479004	chr9	107710475	107681501	-	NM_011349	semaphorin-3F precursor	NP_035479
Krt2	-1581	chr15:101819561-101819940	379	2.65;12.54	1.12;0.87	2.94	0.00113178	0.509604	chr15	101818169	101810688	-	NM_010668	keratin, type II cytoskeletal 2 epidermal	NP_034798
Rpl39l	-187	chr16:10169741-10170340	599	15.92;22.80	6.70;6.93	1.51	0.00117997	0.509604	chr16	10170227	10174911	+	NM_026594	ribosomal protein L39-like protein	NP_080870
Apol10b	1765	chr15:77594141-77594580	439	15.04;11.40	2.23;6.06	1.67	0.0012117	0.509604	chr15	77596125	77584157	-	NM_177820	apolipoprotein L 10b	NP_808488
Trib3	-1670	chr2:152345401-152346060	659	11.50;12.54	3.35;3.46	1.82	0.00126468	0.509604	chr2	152344060	152337424	-	NM_175093	tribbles homolog 3	NP_780302
Adam25	-1077	chr8:40750961-40751300	339	8.85;6.84	0.00;2.60	2.59	0.00129074	0.509604	chr8	40752207	40756176	+	NM_011781	disintegrin and metalloproteinase domain-containing protein 25 precursor	NP_035911
Cnot6	-1830	chr11:49714221-49714860	639	7.08;7.98	1.12;1.73	2.4	0.00133104	0.509604	chr11	49712710	49674705	-	NM_212484	CCR4-NOT transcription complex subunit 6	NP_997649
Zfp566	640	chr7:30089681-30090060	379	6.19;9.12	0.00;2.60	2.56	0.00133104	0.509604	chr7	30090510	30077336	-	NM_152814	zinc finger protein 566	NP_690027
Zfp747	-870	chr7:127376561-127377280	719	23.00;19.38	12.28;6.93	1.14	0.00138844	0.509604	chr7	127376050	127372536	-	NM_175560	zinc finger protein 747	NP_780769
Odf3l1	-607	chr9:56852341-56852800	459	3.54;6.84	0.00;0.00	inf	0.00139778	0.509604	chr9	56851963	56848658	-	NM_198673	outer dense fiber protein 3-like protein 1	NP_941075
Fbln7	-1761	chr2:128861981-128862360	379	3.54;6.84	0.00;0.00	inf	0.00139778	0.509604	chr2	128863931	128897034	+	NM_024237	fibulin-7 precursor	NP_077199
Niacr1	-1554	chr5:123866861-123867280	419	7.08;4.56	1.12;0.00	3.38	0.00141655	0.509604	chr5	123865516	123863569	-	NM_030701	hydroxycarboxylic acid receptor 2	NP_109626
Afap1l2	-1305	chr19:57009661-57010100	439	5.31;6.84	0.00;0.87	3.81	0.00141655	0.509604	chr19	57008575	56912353	-	NM_146102	actin filament-associated protein 1-like 2 isoform 3	NP_666214
Figla	-500	chr6:86016501-86016880	379	7.08;4.56	0.00;0.87	3.75	0.00142195	0.509604	chr6	86017190	86020996	+	NM_012013	factor in the germline alpha	NP_036143
Gm5795	729	chr14:3395621-3396080	459	3.54;11.40	0.00;1.73	3.11	0.00142655	0.509604	chr14	3395121	3562944	+	NM_001270806	alpha takusan-like	NP_001257735
Tagap	-1489	chr17:7924321-7924700	379	2.65;7.98	0.00;0.00	inf	0.00143149	0.509604	chr17	7925999	7934897	+	NM_145968	T-cell activation Rho GTPase-activating protein	NP_666080
Unc13c	677	chr9:73932661-73933120	459	17.69;7.98	3.35;2.60	2.11	0.00146294	0.509604	chr9	73933567	73479423	-	NM_001081153	protein unc-13 homolog C	NP_001074622
Oxct2b	473	chr4:123116281-123117160	879	15.92;11.40	3.35;5.20	1.68	0.00147286	0.509604	chr4	123116247	123118000	+	NM_181859	succinyl-CoA:3-ketoacid coenzyme A transferase 2B, mitochondrial precursor	NP_862907
Tstd1	-1862	chr1:171416981-171417360	379	5.31;3.42	0.00;0.00	inf	0.00147911	0.509604	chr1	171419032	171420352	+	NM_001164525	thiosulfate sulfurtransferase (rhodanese)-like domain containing 1	NP_001157997
Spint3	-54	chr2:164573361-164573660	299	5.31;3.42	0.00;0.00	inf	0.00147911	0.509604	chr2	164573456	164569694	-	NM_001177401	serine peptidase inhibitor, Kunitz type, 3 precursor	NP_001170872
S1pr2	-1077	chr9:20977681-20978060	379	5.31;3.42	0.00;0.00	inf	0.00147911	0.509604	chr9	20976793	20965951	-	NM_010333	sphingosine 1-phosphate receptor 2	NP_034463
Fam177a	623	chr12:55125001-55125300	299	5.31;3.42	0.00;0.00	inf	0.00147911	0.509604	chr12	55124527	55142082	+	NM_028527	protein FAM177A1	NP_082803
Adcy3	488	chr12:4134521-4134760	239	5.31;3.42	0.00;0.00	inf	0.00147911	0.509604	chr12	4134152	4213524	+	NM_138305	adenylate cyclase type 3 isoform 1	NP_612178
1700047I17Rik2	623	chr12:55125001-55125300	299	5.31;3.42	0.00;0.00	inf	0.00147911	0.509604	chr12	55124527	55142082	+	NM_001100116	uncharacterized protein LOC100101807	NP_001093586
Glb1l2	-1973	chr9:26808221-26808560	339	4.42;4.56	0.00;0.00	inf	0.00147911	0.509604	chr9	26806417	26763043	-	NM_153803	beta-galactosidase-1-like protein 2	NP_722498
Alkbh4	470	chr5:136139081-136139420	339	4.42;4.56	0.00;0.00	inf	0.00147911	0.509604	chr5	136138780	136141614	+	NM_028070	alpha-ketoglutarate-dependent dioxygenase alkB homolog 4	NP_082346
Znrd1	1568	chr17:36956621-36957100	479	3.54;5.70	0.00;0.00	inf	0.00147911	0.509604	chr17	36958428	36954357	-	NM_023162	DNA-directed RNA polymerase I subunit RPA12	NP_075651
Txnrd3	-1347	chr6:89642501-89642780	279	3.54;5.70	0.00;0.00	inf	0.00147911	0.509604	chr6	89643987	89675529	+	NM_001178060	thioredoxin reductase 3 isoform 4	NP_001171531
Syne4	1365	chr7:30315941-30316420	479	3.54;5.70	0.00;0.00	inf	0.00147911	0.509604	chr7	30314815	30319045	+	NM_153577	nesprin-4	NP_705805
Spsb2	-1900	chr6:124806841-124807240	399	3.54;5.70	0.00;0.00	inf	0.00147911	0.509604	chr6	124808940	124810614	+	NM_013539	SPRY domain-containing SOCS box protein 2	NP_038567
Ly6g5c	1431	chr17:35109521-35109940	419	3.54;5.70	0.00;0.00	inf	0.00147911	0.509604	chr17	35108299	35111953	+	NM_148947	lymphocyte antigen 6 complex locus protein G5c precursor	NP_683749
BC017612	-604	chr9:15504661-15505120	459	3.54;5.70	0.00;0.00	inf	0.00147911	0.509604	chr9	15505494	15545259	+	NM_133214	UPF0443 protein C11orf75 homolog	NP_573477
Clic6	1194	chr16:92499121-92499560	439	12.38;5.70	2.23;0.87	2.54	0.00150598	0.509604	chr16	92498146	92541241	+	NM_172469	chloride intracellular channel protein 6	NP_766057
Rims3	1952	chr4:120879601-120880040	439	8.85;10.26	3.35;1.73	1.91	0.00151978	0.509604	chr4	120877868	120891560	+	NM_182929	regulating synaptic membrane exocytosis protein 3	NP_891559
Grhl3	1740	chr4:135571441-135572320	879	15.04;10.26	1.12;5.20	2	0.00154325	0.515025	chr4	135573620	135541887	-	NM_001013756	grainyhead-like protein 3 homolog	NP_001013778
Zfp781	332	chr10:81770541-81771080	539	10.61;4.56	2.23;0.00	2.76	0.00168342	0.527078	chr10	81771142	81742820	-	NM_199062	zinc finger protein 781	NP_951017
Gm826	904	chr2:160326321-160326860	539	17.69;14.82	8.93;4.33	1.29	0.00169713	0.527078	chr2	160327494	160311400	-	NM_001033411	uncharacterized protein LOC329554	NP_001028583
Cd300e	-1962	chr11:115063801-115064200	399	4.42;9.12	0.00;0.87	3.97	0.00175975	0.527078	chr11	115062038	115051916	-	NM_172050	CMRF35-like molecule 2 precursor	NP_742047
Ttc12	-1465	chr9:49487421-49487960	539	12.38;12.54	4.47;3.46	1.65	0.00184501	0.528117	chr9	49486225	49436960	-	NM_172770	tetratricopeptide repeat protein 12	NP_766358
Magi3	1986	chr3:104218181-104218660	479	7.96;4.56	1.12;0.00	3.49	0.00189822	0.533762	chr3	104220406	104013264	-	NM_133853	membrane-associated guanylate kinase, WW and PDZ domain-containing protein 3 isoform 2	NP_598614
Cdhr5	956	chr7:141275641-141276020	379	7.96;4.56	1.12;0.00	3.49	0.00189822	0.533762	chr7	141276786	141269084	-	NM_028069	cadherin-related family member 5 isoform 2 precursor	NP_082345
Trpc2	585	chr7:102083301-102084100	799	11.50;12.54	2.23;5.20	1.69	0.00210181	0.534984	chr7	102083115	102096416	+	NM_001109897	short transient receptor potential channel 2 isoform 2	NP_001103367
Lat	-1016	chr7:126370281-126370820	539	10.61;13.68	3.35;4.33	1.66	0.00210181	0.534984	chr7	126369534	126363827	-	NM_010689	linker for activation of T-cells family member 1 precursor	NP_034819
Krt78	1267	chr15:101952741-101953300	559	13.27;9.12	3.35;3.46	1.72	0.00211785	0.534984	chr15	101954287	101946003	-	NM_212487	keratin Kb40	NP_997652
Olfr30	300	chr11:58455521-58455840	319	1.77;7.98	0.00;0.00	inf	0.0021352	0.534984	chr11	58455980	58454914	-	NM_146878	olfactory receptor 30	NP_667089
Slfn4	-195	chr11:83174741-83175240	499	11.50;9.12	1.12;4.33	1.92	0.00217507	0.534984	chr11	83175185	83190216	+	NM_011410	schlafen 4	NP_035540
Ly86	596	chr13:37345621-37346260	639	9.73;11.40	2.23;3.46	1.89	0.00217507	0.534984	chr13	37345344	37419036	+	NM_010745	lymphocyte antigen 86 precursor	NP_034875
Srp72	1670	chr5:76976141-76976600	459	9.73;11.40	3.35;2.60	1.83	0.00217507	0.534984	chr5	76974700	76999935	+	NM_025691	signal recognition particle 72	NP_079967
Rps6ka4	1141	chr19:6839141-6839780	639	7.96;9.12	1.12;2.60	2.2	0.00229374	0.534984	chr19	6840601	6829083	-	NM_019924	ribosomal protein S6 kinase alpha-4	NP_064308
Clec4a3	-474	chr6:122951781-122952300	519	7.96;9.12	1.12;2.60	2.2	0.00229374	0.534984	chr6	122952514	122969878	+	NM_001204241	dendritic cell inhibitory receptor 3	NP_001191170
Adamts17	-1564	chr7:66837921-66838420	499	7.08;10.26	1.12;2.60	2.22	0.00229374	0.534984	chr7	66839734	67152625	+	NM_001033877	ADAM metallopeptidase with thrombospondin type 1 motif, 17 precursor	NP_001029049
Hn1	-1360	chr11:115515521-115515940	419	8.85;7.98	3.35;0.87	2	0.00229374	0.534984	chr11	115514370	115497352	-	NM_008258	hematological and neurological expressed 1 protein	NP_032284
Nrd1	536	chr4:109001121-109001560	439	5.31;10.26	1.12;0.87	2.97	0.00229531	0.534984	chr4	109000804	109061771	+	NM_146150	nardilysin precursor	NP_666262
Slc26a11	1324	chr11:119356561-119357200	639	19.46;15.96	5.58;8.66	1.31	0.00234564	0.534984	chr11	119355556	119381076	+	NM_178743	sodium-independent sulfate anion transporter	NP_848858
Pcdha4-g	1660	chr18:36954061-36954740	679	22.11;17.10	6.70;10.39	1.2	0.00235198	0.534984	chr18	36952740	37840200	+	NM_001174154	protocadherin alpha 4-gamma precursor	NP_001167625
Cpn2	-298	chr16:30267501-30268160	659	20.35;19.38	10.05;7.79	1.15	0.00235198	0.534984	chr16	30267532	30256378	-	NM_027904	carboxypeptidase N subunit 2 precursor	NP_082180
Syce2	663	chr8:84872621-84873220	599	9.73;10.26	2.23;3.46	1.81	0.00245325	0.534984	chr8	84872257	84887446	+	NM_001168244	synaptonemal complex central element protein 2 isoform 3	NP_001161716
Polrmt	-1439	chr10:79747761-79748280	519	7.08;4.56	0.00;1.73	2.75	0.00246975	0.534984	chr10	79746581	79736124	-	NM_172551	DNA-directed RNA polymerase, mitochondrial precursor	NP_766139
Olfr641	53	chr7:104039661-104040040	379	7.08;4.56	0.00;1.73	2.75	0.00246975	0.534984	chr7	104039797	104040736	+	NM_147072	olfactory receptor 641	NP_667283
Mybpc3	1927	chr2:91119881-91120260	379	7.08;4.56	0.00;1.73	2.75	0.00246975	0.534984	chr2	91118143	91136516	+	NM_008653	myosin-binding protein C, cardiac-type	NP_032679
Rbp1	-100	chr9:98422661-98423060	399	7.08;4.56	1.12;0.87	2.55	0.00246975	0.534984	chr9	98422960	98446550	+	NM_011254	retinol-binding protein 1	NP_035384
Cdc16	1971	chr8:13759441-13759880	439	5.31;6.84	1.12;0.87	2.61	0.00246975	0.534984	chr8	13757689	13781882	+	NM_027276	cell division cycle protein 16 homolog	NP_081552
Aspg	1178	chr12:112107541-112108180	639	7.08;14.82	3.35;1.73	2.11	0.0024916	0.534984	chr12	112106682	112127573	+	NM_001081169	60 kDa lysophospholipase	NP_001074638
Myo1a	-1695	chr10:127703301-127703820	519	8.85;6.84	1.12;2.60	2.08	0.00251255	0.534984	chr10	127705255	127720940	+	NM_001081219	unconventional myosin-Ia	NP_001074688
Gm17359	695	chr3:79345781-79346360	579	8.85;6.84	2.23;1.73	1.98	0.00251255	0.534984	chr3	79345375	79464128	+	NM_001142953	uncharacterized protein LOC100233207	NP_001136425
Defa22	564	chr8:21162601-21163080	479	7.08;9.12	2.23;1.73	2.03	0.00251255	0.534984	chr8	21162276	21163249	+	NM_207658	alpha-defensin 22 precursor	NP_997541
Hnf4g	1961	chr3:3509761-3510220	459	7.08;12.54	1.12;2.60	2.4	0.00253338	0.534984	chr3	3508029	3659800	+	NM_013920	hepatocyte nuclear factor 4-gamma	NP_038948
Tmem132d	-1373	chr5:128434261-128434640	379	2.65;6.84	0.00;0.00	inf	0.00253348	0.534984	chr5	128433077	127783490	-	NM_172885	transmembrane protein 132D precursor	NP_766473
Htr5b	-1805	chr1:121530081-121530460	379	2.65;6.84	0.00;0.00	inf	0.00253348	0.534984	chr1	121528465	121509772	-	NM_010483	5-hydroxytryptamine receptor 5B	NP_034613
Hbb-bh2	-1179	chr7:103841581-103841820	239	2.65;6.84	0.00;0.00	inf	0.00253348	0.534984	chr7	103840521	103839123	-	NM_001127686	hemoglobin beta, bh2	NP_001121158
Cd59b	-579	chr2:104070241-104070620	379	2.65;6.84	0.00;0.00	inf	0.00253348	0.534984	chr2	104071009	104084957	+	NM_181858	CD59B glycoprotein precursor	NP_862906
Rasgef1b	-1823	chr5:99254561-99254940	379	3.54;9.12	1.12;0.00	3.5	0.0025489	0.534984	chr5	99252927	99217419	-	NM_181318	ras-GEF domain-containing family member 1B isoform 2	NP_851835
Grin2b	-1269	chr6:136174481-136175080	599	11.50;14.82	3.35;5.20	1.62	0.00256606	0.534984	chr6	136173511	135729804	-	NM_008171	glutamate receptor ionotropic, NMDA 2B precursor	NP_032197
Ddx51	1710	chr5:110654841-110655480	639	14.15;13.68	2.23;6.93	1.6	0.0026231	0.534984	chr5	110653450	110660496	+	NM_027156	ATP-dependent RNA helicase DDX51	NP_081432
Acr	1585	chr15:89569741-89570080	339	7.08;5.70	0.00;1.73	2.88	0.00265161	0.534984	chr15	89568325	89574585	+	NM_001205049	acrosin isoform 2 precursor	NP_001191978
Amy1	1802	chr3:113572781-113573140	359	6.19;6.84	0.00;1.73	2.91	0.00265161	0.534984	chr3	113574762	113555951	-	NM_007446	alpha-amylase 1 precursor	NP_031472
Zfp12	1383	chr5:143236421-143236760	339	7.08;5.70	1.12;0.87	2.69	0.00265161	0.534984	chr5	143235207	143247970	+	NM_177681	zinc finger protein 12	NP_808349
Il4ra	1839	chr7:125553901-125554340	439	7.08;5.70	1.12;0.87	2.69	0.00265161	0.534984	chr7	125552281	125579474	+	NM_001008700	interleukin-4 receptor subunit alpha precursor	NP_001008700
Kel	495	chr6:41703601-41704060	459	6.19;6.84	1.12;0.87	2.72	0.00265161	0.534984	chr6	41704325	41686329	-	NM_032540	kell blood group glycoprotein homolog	NP_115929
Frmd4b	-403	chr6:97617921-97618200	279	6.19;6.84	1.12;0.87	2.72	0.00265161	0.534984	chr6	97617657	97286866	-	NM_145148	FERM domain-containing protein 4B	NP_660130
Slc45a4	316	chr15:73595981-73596440	459	7.08;11.40	3.35;0.87	2.13	0.00275646	0.534984	chr15	73596526	73580290	-	NM_001168255	solute carrier family 45 member 4 isoform 2	NP_001161727
Slc26a4	-1441	chr12:31561281-31561540	259	6.19;4.56	0.00;0.87	3.63	0.00276765	0.534984	chr12	31559969	31519818	-	NM_011867	pendrin	NP_035997
Pcdhga10	1423	chr18:37748421-37748800	379	6.19;4.56	0.00;0.87	3.63	0.00276765	0.534984	chr18	37747187	37841870	+	NM_033593	protocadherin gamma-A10 precursor	NP_291071
Ly75	-1019	chr2:60384041-60384460	419	6.19;4.56	0.00;0.87	3.63	0.00276765	0.534984	chr2	60383231	60293759	-	NM_013825	lymphocyte antigen 75 precursor	NP_038853
Gstm2	1466	chr3:107984801-107985140	339	6.19;4.56	0.00;0.87	3.63	0.00276765	0.534984	chr3	107986436	107981701	-	NM_008183	glutathione S-transferase Mu 2	NP_032209
Galnt4	576	chr10:99108521-99108900	379	6.19;4.56	1.12;0.00	3.27	0.00276765	0.534984	chr10	99108134	99113247	+	NM_015737	polypeptide N-acetylgalactosaminyltransferase 4	NP_056552
Cdx1	1149	chr18:61034841-61035260	419	6.19;4.56	1.12;0.00	3.27	0.00276765	0.534984	chr18	61036199	61018861	-	NM_009880	homeobox protein CDX-1	NP_034010
Apom	1182	chr17:35130381-35130760	379	6.19;4.56	1.12;0.00	3.27	0.00276765	0.534984	chr17	35131752	35128996	-	NM_018816	apolipoprotein M precursor	NP_061286
Hyls1	-1541	chr9:35571401-35571820	419	5.31;5.70	0.00;0.87	3.67	0.00276765	0.534984	chr9	35570069	35560820	-	NM_029762	hydrolethalus syndrome protein 1 homolog	NP_084038
Gm13298	419	chr4:42318481-42318900	419	5.31;5.70	0.00;0.87	3.67	0.00276765	0.534984	chr4	42318271	42324070	+	NM_001085530	protein FAM205A	NP_001078999
Adam10	-480	chr9:70678241-70678800	559	5.31;5.70	0.00;0.87	3.67	0.00276765	0.534984	chr9	70679000	70780229	+	NM_007399	disintegrin and metalloproteinase domain-containing protein 10 precursor	NP_031425
Fat2	-1873	chr11:55313901-55314360	459	5.31;5.70	1.12;0.00	3.3	0.00276765	0.534984	chr11	55312257	55250609	-	NM_001029988	protocadherin Fat 2 precursor	NP_001025159
Ccdc57	-1738	chr11:120934401-120934820	419	5.31;5.70	1.12;0.00	3.3	0.00276765	0.534984	chr11	120932872	120826541	-	NM_027745	coiled-coil domain-containing protein 57	NP_082021
Syt7	-1489	chr19:10387421-10387780	359	4.42;6.84	0.00;0.87	3.7	0.00276765	0.534984	chr19	10389089	10453181	+	NM_018801	synaptotagmin-7 alpha isoform	NP_061271
Ccdc38	1439	chr10:93541881-93542260	379	4.42;6.84	0.00;0.87	3.7	0.00276765	0.534984	chr10	93540631	93584326	+	NM_175488	coiled-coil domain-containing protein 38	NP_780697
Pcdhb14	1164	chr18:37448321-37449320	999	19.46;12.54	5.58;5.20	1.57	0.00278613	0.534984	chr18	37447656	37451094	+	NM_053139	protocadherin beta-14 precursor	NP_444369
1700026D08Rik	1779	chr7:83792741-83793380	639	19.46;12.54	3.35;6.93	1.64	0.00280485	0.534984	chr7	83794839	83775616	-	NM_029335	uncharacterized protein C15orf26 homolog	NP_083611
Snai2	792	chr16:14706461-14706840	379	3.54;9.12	0.00;0.87	3.87	0.00280722	0.534984	chr16	14705858	14709382	+	NM_011415	zinc finger protein SNAI2	NP_035545
Olfr315	-1748	chr11:58776121-58776560	439	7.08;11.40	2.23;1.73	2.22	0.00281361	0.534984	chr11	58778088	58779086	+	NM_146538	olfactory receptor 315	NP_666749
Mageb4	279	chrX:86255641-86256240	599	13.27;11.40	3.35;5.20	1.53	0.00293687	0.534984	chrX	86256219	86250255	-	NM_001033492	melanoma antigen, family B, 4	NP_001028664
Cd9	-1325	chr6:125495861-125496300	439	14.15;10.26	5.58;3.46	1.43	0.00293687	0.534984	chr6	125494755	125460265	-	NM_007657	CD9 antigen	NP_031683
Il10ra	-554	chr9:45269341-45270060	719	13.27;11.40	6.70;2.60	1.41	0.00293687	0.534984	chr9	45269146	45253838	-	NM_008348	interleukin-10 receptor subunit alpha precursor	NP_032374
Cytip	512	chr2:58159281-58159940	659	25.65;27.35	7.82;15.59	1.18	0.00294583	0.534984	chr2	58160122	58129138	-	NM_139200	cytohesin-interacting protein	NP_631939
Smyd2	-1842	chr1:189923941-189924320	379	4.42;3.42	0.00;0.00	inf	0.00313394	0.534984	chr1	189922288	189880491	-	NM_026796	N-lysine methyltransferase SMYD2	NP_081072
Pcsk9	1235	chr4:106462921-106463260	339	4.42;3.42	0.00;0.00	inf	0.00313394	0.534984	chr4	106464325	106442333	-	NM_153565	proprotein convertase subtilisin/kexin type 9 precursor	NP_705793
Oxct2a	-151	chr4:123323661-123324000	339	4.42;3.42	0.00;0.00	inf	0.00313394	0.534984	chr4	123323679	123321874	-	NM_022033	succinyl-CoA:3-ketoacid coenzyme A transferase 2A, mitochondrial precursor	NP_071316
Olfr644	-1001	chr7:104069841-104070220	379	4.42;3.42	0.00;0.00	inf	0.00313394	0.534984	chr7	104069029	104068084	-	NM_147121	olfactory receptor 644	NP_667332
Olfr1079	903	chr2:86537821-86538200	379	4.42;3.42	0.00;0.00	inf	0.00313394	0.534984	chr2	86538913	86537965	-	NM_146407	olfactory receptor 1079	NP_666519
Mgst1	-1426	chr6:138138921-138139300	379	4.42;3.42	0.00;0.00	inf	0.00313394	0.534984	chr6	138140536	138156752	+	NM_019946	microsomal glutathione S-transferase 1	NP_064330
Gm12253	702	chr11:58433101-58433420	319	4.42;3.42	0.00;0.00	inf	0.00313394	0.534984	chr11	58432558	58441622	+	NM_001045542	uncharacterized protein LOC624860 precursor	NP_001039007
Evi2b	1272	chr11:79522361-79522620	259	4.42;3.42	0.00;0.00	inf	0.00313394	0.534984	chr11	79523762	79513384	-	NM_001077496	protein EVI2B precursor	NP_001070964
Cnot6	1880	chr11:49710641-49711020	379	4.42;3.42	0.00;0.00	inf	0.00313394	0.534984	chr11	49712710	49674705	-	NM_212484	CCR4-NOT transcription complex subunit 6	NP_997649
Chst12	1582	chr5:140507041-140507340	299	4.42;3.42	0.00;0.00	inf	0.00313394	0.534984	chr5	140505608	140525238	+	NM_021528	carbohydrate sulfotransferase 12	NP_067503
Zscan4b	1840	chr7:10903041-10903380	339	3.54;4.56	0.00;0.00	inf	0.00313394	0.534984	chr7	10905050	10900739	-	NM_001185173	zinc finger and SCAN domain containing 4B	NP_001172102
Vmo1	-914	chr11:70515341-70515720	379	3.54;4.56	0.00;0.00	inf	0.00313394	0.534984	chr11	70514616	70513515	-	NM_001013607	vitelline membrane outer layer protein 1 homolog precursor	NP_001013625
Vmn1r165	-1829	chr7:21509821-21510080	259	3.54;4.56	0.00;0.00	inf	0.00313394	0.534984	chr7	21511779	21512703	+	NM_001166850	vomeronasal 1 receptor 165	NP_001160322
Vmn1r155	-1829	chr7:21509821-21510080	259	3.54;4.56	0.00;0.00	inf	0.00313394	0.534984	chr7	21511779	21512703	+	NM_001166753	vomeronasal 1 receptor 155	NP_001160225
Vmn1r137	-1829	chr7:21509821-21510080	259	3.54;4.56	0.00;0.00	inf	0.00313394	0.534984	chr7	21511779	21512703	+	NM_001166849	vomeronasal 1 receptor 137	NP_001160321
Vmn1r130	-1829	chr7:21509821-21510080	259	3.54;4.56	0.00;0.00	inf	0.00313394	0.534984	chr7	21511779	21512703	+	NM_001166848	vomeronasal 1 receptor 130	NP_001160320
Vmn1r107	-1829	chr7:21509821-21510080	259	3.54;4.56	0.00;0.00	inf	0.00313394	0.534984	chr7	21511779	21512703	+	NM_001166759	vomeronasal 1 receptor 107	NP_001160231
Ugt1a6a	-418	chr1:88134261-88134520	259	3.54;4.56	0.00;0.00	inf	0.00313394	0.534984	chr1	88134808	88220002	+	NM_145079	UDP-glucuronosyltransferase 1-6 precursor	NP_659545
Taar7f	-1989	chr10:24047321-24047720	399	3.54;4.56	0.00;0.00	inf	0.00313394	0.534984	chr10	24049509	24050586	+	NM_001010839	trace amine-associated receptor 7f	NP_001010839
Olfr190	-712	chr16:59075661-59075920	259	3.54;4.56	0.00;0.00	inf	0.00313394	0.534984	chr16	59075078	59074154	-	NM_146397	olfactory receptor 190	NP_666509
Olfr161	-97	chr16:3592161-3592440	279	3.54;4.56	0.00;0.00	inf	0.00313394	0.534984	chr16	3592397	3593339	+	NM_146860	olfactory receptor 161	NP_667071
Olfr1416	-1771	chr1:92482201-92482580	379	3.54;4.56	0.00;0.00	inf	0.00313394	0.534984	chr1	92480619	92479680	-	NM_147038	olfactory receptor 1416	NP_667249
Ly6d	-223	chr15:74763621-74763960	339	3.54;4.56	0.00;0.00	inf	0.00313394	0.534984	chr15	74763567	74762055	-	NM_010742	lymphocyte antigen 6D precursor	NP_034872
Gm15292	279	chr8:21249841-21250240	399	3.54;4.56	0.00;0.00	inf	0.00313394	0.534984	chr8	21249761	21250461	+	NM_001177487	predicted gene 15292 precursor	NP_001170958
Eppin	-1149	chr2:164594601-164594840	239	3.54;4.56	0.00;0.00	inf	0.00313394	0.534984	chr2	164593571	164588342	-	NM_029325	eppin precursor	NP_083601
Bpifb5	-1931	chr2:154221661-154221960	299	3.54;4.56	0.00;0.00	inf	0.00313394	0.534984	chr2	154223741	154240902	+	NM_144890	long palate lung and nasal epithelium protein 5 precursor	NP_659139
Rhox2a	309	chrX:37244861-37245740	879	38.04;23.93	14.52;13.86	1.13	0.0031411	0.534984	chrX	37244991	37249690	+	NM_029203	reproductive homeobox 2A	NP_083479
Fstl5	-1210	chr3:76073161-76073540	379	2.65;10.26	1.12;0.87	2.7	0.00320307	0.534984	chr3	76074560	76710005	+	NM_178673	follistatin-related protein 5 precursor	NP_848788
Prf1	-275	chr10:61297281-61297840	559	13.27;5.70	3.35;0.87	2.17	0.00350651	0.563199	chr10	61297835	61304263	+	NM_011073	perforin-1 precursor	NP_035203
Wsb2	-1724	chr5:117355401-117355760	359	2.65;10.26	0.00;1.73	2.9	0.00357144	0.568298	chr5	117357304	117378589	+	NM_021539	WD repeat and SOCS box-containing protein 2	NP_067514
Nlrp1a	1344	chr11:71143121-71143600	479	4.42;10.26	1.12;0.87	2.89	0.00362608	0.573379	chr11	71144704	71091196	-	NM_001004142	NLR family, pyrin domain containing 1A	NP_001004142
Cpsf4l	676	chr11:113708561-113709140	579	11.50;9.12	3.35;3.46	1.6	0.00366024	0.573379	chr11	113709526	113698170	-	NM_026682	cleavage and polyadenylation specific factor 4-like isoform 1	NP_080958
Mrgprh	867	chr17:12876441-12877360	919	15.92;14.82	8.93;4.33	1.21	0.00372924	0.573379	chr17	12876033	12877842	+	NM_030726	mas-related G-protein coupled receptor member H	NP_109651
Tagln	978	chr9:45934841-45935320	479	7.96;10.26	1.12;3.46	1.99	0.00374479	0.573379	chr9	45936058	45929627	-	NM_011526	transgelin	NP_035656
Ehf	1506	chr2:103301421-103301960	539	7.96;10.26	3.35;1.73	1.84	0.00374479	0.573379	chr2	103303196	103263432	-	NM_007914	ETS homologous factor	NP_031940
Cacnb1	-1038	chr11:98019221-98019600	379	7.96;3.42	1.12;0.00	3.35	0.00385726	0.573379	chr11	98018372	98004924	-	NM_001159320	voltage-dependent L-type calcium channel subunit beta-1 isoform D	NP_001152792
Rab13	394	chr3:90221021-90221400	379	2.65;9.12	1.12;0.00	3.4	0.00388208	0.573379	chr3	90220816	90225963	+	NM_026677	ras-related protein Rab-13	NP_080953
Nlrp3	-515	chr11:59541981-59542360	379	6.19;2.28	0.00;0.00	inf	0.00389811	0.573379	chr11	59542685	59566956	+	NM_145827	NACHT, LRR and PYD domains-containing protein 3	NP_665826
Fcgbp	-455	chr7:28070641-28070920	279	6.19;2.28	0.00;0.00	inf	0.00389811	0.573379	chr7	28071235	28120864	+	NM_001122603	Fc fragment of IgG binding protein precursor	NP_001116075
Eif4e2	1392	chr1:87215141-87215520	379	6.19;2.28	0.00;0.00	inf	0.00389811	0.573379	chr1	87213938	87228858	+	NM_001039169	eukaryotic translation initiation factor 4E type 2 isoform 2	NP_001034258
Xlr5a	-618	chrX:73118001-73118640	639	34.50;30.77	22.34;6.06	1.2	0.00391294	0.573379	chrX	73117702	73107634	-	NM_001045539	X-linked lymphocyte-regulated 5A	NP_001039004
Slc39a2	1341	chr14:51894561-51895340	779	37.15;22.80	17.87;11.26	1.04	0.00394346	0.573379	chr14	51893609	51896745	+	NM_001039676	solute carrier family 39 (zinc transporter), member 2	NP_001034765
Slc22a13	-1515	chr9:119210221-119211020	799	23.00;21.66	8.93;12.12	1.08	0.00395157	0.573379	chr9	119209105	119192977	-	NM_133980	solute carrier family 22 member 13	NP_598741
Pcdha2	1686	chr18:36940521-36941260	739	22.11;15.96	10.05;6.93	1.16	0.00395524	0.573379	chr18	36939204	37187660	+	NM_198117	protocadherin alpha 2 precursor	NP_932785
Wdr18	-1011	chr10:79958881-79959400	519	7.96;5.70	1.12;1.73	2.26	0.00396154	0.573379	chr10	79960151	79969246	+	NM_175450	WD repeat-containing protein 18	NP_780659
Frmpd1	-1765	chr4:45182821-45183460	639	6.19;7.98	1.12;1.73	2.31	0.00396154	0.573379	chr4	45184905	45285936	+	NM_001081172	FERM and PDZ domain-containing protein 1	NP_001074641
Ccl4	-413	chr11:83661961-83662380	419	6.19;7.98	1.12;1.73	2.31	0.00396154	0.573379	chr11	83662583	83664683	+	NM_013652	C-C motif chemokine 4 precursor	NP_038680
Uvrag	-1736	chr7:99142781-99142980	199	1.77;6.84	0.00;0.00	inf	0.00396536	0.573379	chr7	99141144	98886742	-	NM_178635	UV radiation resistance associated	NP_848750
Taar8b	1614	chr10:24090521-24090840	319	1.77;6.84	0.00;0.00	inf	0.00396536	0.573379	chr10	24092294	24091259	-	NM_001010837	trace amine-associated receptor 8b	NP_001010837
Slu7	770	chr11:43434381-43434620	239	1.77;6.84	0.00;0.00	inf	0.00396536	0.573379	chr11	43433730	43447981	+	NM_198936	pre-mRNA-splicing factor SLU7	NP_945174
Olfr259	-695	chr2:87108901-87109260	359	1.77;6.84	0.00;0.00	inf	0.00396536	0.573379	chr2	87108385	87107446	-	NM_146770	olfactory receptor 259	NP_666981
Dct	1326	chr14:118050801-118051040	239	1.77;6.84	0.00;0.00	inf	0.00396536	0.573379	chr14	118052246	118012789	-	NM_010024	L-dopachrome tautomerase precursor	NP_034154
Nts	1208	chr10:102488961-102489460	499	7.08;5.70	1.12;1.73	2.16	0.00419772	0.573379	chr10	102490418	102481755	-	NM_024435	neurotensin/neuromedin N precursor	NP_077755
Cdc42ep2	-454	chr19:5925101-5925440	339	6.19;6.84	0.00;2.60	2.33	0.00419772	0.573379	chr19	5924816	5917555	-	NM_026772	cdc42 effector protein 2	NP_081048
Il17rc	1196	chr6:113472381-113472920	539	6.19;6.84	1.12;1.73	2.19	0.00419772	0.573379	chr6	113471454	113483140	+	NM_134159	interleukin-17 receptor C isoform 2 precursor	NP_598920
Col9a3	1209	chr2:180599221-180599640	419	6.19;6.84	1.12;1.73	2.19	0.00419772	0.573379	chr2	180598221	180622185	+	NM_009936	procollagen, type IX, alpha 3 precursor	NP_034066
Arhgef17	-929	chr7:100932801-100933380	579	6.19;6.84	1.12;1.73	2.19	0.00419772	0.573379	chr7	100932161	100869745	-	NM_001081116	rho guanine nucleotide exchange factor 17	NP_001074585
Wdr72	1797	chr9:74111821-74112440	619	7.08;5.70	2.23;0.87	2.04	0.00419772	0.573379	chr9	74110333	74283203	+	NM_001033500	WD repeat domain 72	NP_001028672
Cd300a	-760	chr11:114889061-114889500	439	7.08;5.70	2.23;0.87	2.04	0.00419772	0.573379	chr11	114890040	114904651	+	NM_170758	CMRF35-like molecule 8 precursor	NP_739564
Camkk1	-1297	chr11:73017461-73017960	499	5.31;7.98	1.12;1.73	2.22	0.00419772	0.573379	chr11	73019007	73042065	+	NM_018883	calcium/calmodulin-dependent protein kinase kinase 1	NP_061371
1700018B08Rik	-1786	chr8:121543521-121543960	439	5.31;7.98	1.12;1.73	2.22	0.00419772	0.573379	chr8	121541954	121530783	-	NM_029597	uncharacterized protein LOC76405	NP_083873
Cd38	-1266	chr5:43867321-43867800	479	5.31;7.98	2.23;0.87	2.1	0.00419772	0.573379	chr5	43868826	43912374	+	NM_007646	ADP-ribosyl cyclase 1	NP_031672
Ppy	1550	chr11:102099461-102100040	579	9.73;6.84	2.23;2.60	1.78	0.00421073	0.573379	chr11	102101300	102099930	-	NM_008918	pancreatic prohormone precursor	NP_032944
Cndp1	1885	chr18:84647961-84648460	499	9.73;6.84	3.35;1.73	1.7	0.00421073	0.573379	chr18	84650095	84610508	-	NM_177450	beta-Ala-His dipeptidase	NP_803233
Gm13298	917	chr4:42527121-42527520	399	3.54;7.98	1.12;0.00	3.37	0.00426406	0.573379	chr4	42528237	42522438	-	NM_001085530	protein FAM205A	NP_001078999
Nxnl1	479	chr8:71565941-71566400	459	9.73;5.70	0.00;2.60	2.57	0.00429813	0.573379	chr8	71566649	71560554	-	NM_145598	nucleoredoxin-like protein 1	NP_663573
Lemd2	-1072	chr17:27205141-27205880	739	13.27;14.82	4.47;6.06	1.42	0.00445016	0.573379	chr17	27204438	27189599	-	NM_146075	LEM domain-containing protein 2	NP_666187
Galnt15	368	chr14:32029001-32029940	939	9.73;13.68	4.47;3.46	1.56	0.0044928	0.573379	chr14	32029102	32058326	+	NM_030166	polypeptide N-acetylgalactosaminyltransferase-like protein 2	NP_084442
Syne1	482	chr10:5550021-5550400	379	2.65;5.70	0.00;0.00	inf	0.00452731	0.573379	chr10	5550692	5336948	-	NM_153399	nesprin-1 isoform 1	NP_700448
Olfr630	510	chr7:103756701-103756980	279	2.65;5.70	0.00;0.00	inf	0.00452731	0.573379	chr7	103757350	103754149	-	NM_147098	olfactory receptor 630	NP_667309
Fbxw10	1948	chr11:62848921-62849220	299	2.65;5.70	0.00;0.00	inf	0.00452731	0.573379	chr11	62847122	62877462	+	NM_001033669	F-box/WD repeat-containing protein 10	NP_001028841
Efemp1	-1974	chr11:28851061-28851400	339	2.65;5.70	0.00;0.00	inf	0.00452731	0.573379	chr11	28853204	28926743	+	NM_146015	EGF-containing fibulin-like extracellular matrix protein 1 precursor	NP_666127
Cyp2d12	-547	chr15:82554361-82554740	379	8.85;4.56	0.00;1.73	2.95	0.00459407	0.573379	chr15	82555097	82559413	+	NM_201360	cytochrome P450, family 2, subfamily d, polypeptide 12	NP_958748
Espl1	1868	chr15:102297721-102298600	879	15.92;15.96	5.58;7.79	1.25	0.00462803	0.573379	chr15	102296292	102324356	+	NM_001014976	separin	NP_001014976
Ccdc90a	-879	chr13:43560881-43561260	379	3.54;7.98	0.00;0.87	3.73	0.00482484	0.573379	chr13	43560191	43538405	-	NM_001081059	mitochondrial calcium uniporter regulator 1	NP_001074528
Gm4984	128	chrX:12651681-12652340	659	15.04;19.38	5.58;8.66	1.27	0.00491033	0.573379	chrX	12651882	12652820	+	NM_001101484	brain protein 44-like protein 2	NP_001094954
Shmt2	1714	chr10:127520521-127520940	419	5.31;4.56	0.00;0.87	3.51	0.00496452	0.573379	chr10	127522444	127517122	-	NM_028230	serine hydroxymethyltransferase, mitochondrial isoform 1	NP_082506
Hdac5	-1708	chr11:102231661-102232100	439	5.31;4.56	0.00;0.87	3.51	0.00496452	0.573379	chr11	102230172	102195746	-	NM_010412	histone deacetylase 5 isoform 2	NP_034542
A530099J19Rik	-1419	chr13:19734201-19734540	339	5.31;4.56	1.12;0.00	3.14	0.00496452	0.573379	chr13	19732951	19727416	-	NM_175688	G protein-coupled receptor-like	NP_783619
Stat4	837	chr1:52008881-52009280	399	4.42;5.70	0.00;0.87	3.55	0.00496452	0.573379	chr1	52008243	52107184	+	NM_011487	signal transducer and activator of transcription 4	NP_035617
Olfr1086	-319	chr2:86677461-86677840	379	4.42;5.70	0.00;0.87	3.55	0.00496452	0.573379	chr2	86677331	86676398	-	NM_146592	olfactory receptor 1086	NP_666803
Hbq1a	742	chr11:32300481-32301140	659	20.35;14.82	5.58;9.53	1.22	0.00497035	0.573379	chr11	32300068	32300873	+	NM_175000	hemoglobin, theta T2	NP_778165
Defb25	-1857	chr2:152624781-152625040	259	8.85;2.28	1.12;0.00	3.32	0.00500003	0.573379	chr2	152623053	152622355	-	NM_001039122	beta-defensin 25 precursor	NP_001034211
1700071K01Rik	889	chr11:81572281-81573020	739	14.15;12.54	4.47;6.06	1.34	0.0051127	0.573379	chr11	81573539	81572501	-	NM_001033765	prohibitin-like	NP_001028937
Nfam1	-530	chr15:83030101-83030860	759	12.38;14.82	7.82;3.46	1.27	0.0051127	0.573379	chr15	83029950	82996735	-	NM_001271413	NFAT activation molecule 1 isoform c	NP_001258342
Elovl3	1142	chr19:46132821-46133260	439	11.50;10.26	3.35;4.33	1.5	0.00514506	0.573379	chr19	46131898	46135694	+	NM_007703	elongation of very long chain fatty acids protein 3	NP_031729
Il21r	1982	chr7:125605121-125605700	579	12.38;9.12	5.58;2.60	1.39	0.00514506	0.573379	chr7	125603428	125633570	+	NM_021887	interleukin-21 receptor precursor	NP_068687
Figla	200	chr6:86017021-86017760	739	12.38;26.21	8.93;6.06	1.36	0.00515876	0.573379	chr6	86017190	86020996	+	NM_012013	factor in the germline alpha	NP_036143
1700030F18Rik	1488	chr15:99929981-99930360	379	9.73;3.42	2.23;0.00	2.56	0.0054609	0.573379	chr15	99931658	99918347	-	NM_028180	protein FAM186A	NP_082456
Ccdc121	791	chr1:181510341-181510980	639	11.50;15.96	4.47;6.06	1.38	0.00548443	0.573379	chr1	181511451	181509632	-	NM_207280	coiled-coil domain containing 121	NP_997163
Gm5113	359	chr7:30169941-30170620	679	10.61;7.98	1.12;4.33	1.77	0.00562296	0.573379	chr7	30169921	30180209	+	NM_001033540	uncharacterized protein B430201F14	NP_001028712
Samt1	677	chrX:154032941-154033360	419	8.85;10.26	4.47;1.73	1.62	0.00562296	0.573379	chrX	154033827	154022779	-	NM_030036	uncharacterized protein LOC78092	NP_084312
Gm15140	677	chrX:154032941-154033360	419	8.85;10.26	4.47;1.73	1.62	0.00562296	0.573379	chrX	154033827	154022779	-	NM_001243017	uncharacterized protein LOC625713	NP_001229946
4921511M17Rik	677	chrX:154032941-154033360	419	8.85;10.26	4.47;1.73	1.62	0.00562296	0.573379	chrX	154033827	154022779	-	NM_001201358	uncharacterized protein LOC667256	NP_001188287
AU022751	1350	chrX:6081721-6082420	699	17.69;14.82	7.82;6.93	1.14	0.00563671	0.573379	chrX	6083420	6081217	-	NM_001166433	uncharacterized protein LOC102991 isoform 1	NP_001159905
Zpbp	1419	chr11:11460841-11461160	319	2.65;4.56	0.00;0.00	inf	0.00582219	0.573379	chr11	11462419	11280039	-	NM_015785	zona pellucida-binding protein 1 isoform 1	NP_056600
Zfp386	-1813	chr12:116045761-116046060	299	2.65;4.56	0.00;0.00	inf	0.00582219	0.573379	chr12	116047723	116060594	+	NM_019565	zinc finger protein 386 (Kruppel-like) isoform b	NP_062511
Xpc	968	chr6:91514761-91515080	319	2.65;4.56	0.00;0.00	inf	0.00582219	0.573379	chr6	91515888	91489306	-	NM_009531	DNA repair protein complementing XP-C cells homolog	NP_033557
Wisp1	1668	chr15:66892941-66893180	239	2.65;4.56	0.00;0.00	inf	0.00582219	0.573379	chr15	66891392	66923199	+	NM_018865	WNT1-inducible-signaling pathway protein 1 precursor	NP_061353
Tspo	-1072	chr15:83562381-83562620	239	2.65;4.56	0.00;0.00	inf	0.00582219	0.573379	chr15	83563572	83574203	+	NM_009775	translocator protein	NP_033905
Tmbim4	1295	chr10:120209981-120210260	279	2.65;4.56	0.00;0.00	inf	0.00582219	0.573379	chr10	120208825	120224897	+	NM_026617	protein lifeguard 4	NP_080893
Tfdp2	1856	chr9:96197941-96198320	379	2.65;4.56	0.00;0.00	inf	0.00582219	0.573379	chr9	96196274	96323646	+	NM_001184708	transcription factor Dp-2 isoform B	NP_001171637
Spns2	1037	chr11:72473821-72474160	339	2.65;4.56	0.00;0.00	inf	0.00582219	0.573379	chr11	72475027	72451637	-	NM_001276383	protein spinster homolog 2 isoform 2	NP_001263312
Saal1	-49	chr7:46710521-46710880	359	2.65;4.56	0.00;0.00	inf	0.00582219	0.573379	chr7	46710651	46686107	-	NM_030233	protein SAAL1	NP_084509
Prl2c3	-591	chr13:12800481-12800860	379	2.65;4.56	0.00;0.00	inf	0.00582219	0.573379	chr13	12800079	12790820	-	NM_011118	prolactin-2C3 precursor	NP_035248
Plg	22	chr17:12378481-12378780	299	2.65;4.56	0.00;0.00	inf	0.00582219	0.573379	chr17	12378608	12419384	+	NM_008877	plasminogen precursor	NP_032903
Olfr714	371	chr7:107074021-107074380	359	2.65;4.56	0.00;0.00	inf	0.00582219	0.573379	chr7	107073829	107074783	+	NM_147033	olfactory receptor 714	NP_667244
Olfr1340	-28	chr4:118726061-118726380	319	2.65;4.56	0.00;0.00	inf	0.00582219	0.573379	chr4	118726248	118727196	+	NM_146304	olfactory receptor 1340	NP_666416
Nxf1	824	chr19:8757841-8758040	199	2.65;4.56	0.00;0.00	inf	0.00582219	0.573379	chr19	8757116	8770910	+	NM_001276704	nuclear RNA export factor 1 isoform 2	NP_001263633
Ms4a18	-1767	chr19:11019561-11019900	339	2.65;4.56	0.00;0.00	inf	0.00582219	0.573379	chr19	11017963	10997024	-	NM_001251849	membrane-spanning 4-domains subfamily A member 18	NP_001238778
Limch1	-1695	chr5:66966561-66966880	319	2.65;4.56	0.00;0.00	inf	0.00582219	0.573379	chr5	66968415	67057159	+	NM_001256122	LIM and calponin homology domains-containing protein 1 isoform 2	NP_001243051
Kif3a	-698	chr11:53566541-53566820	279	2.65;4.56	0.00;0.00	inf	0.00582219	0.573379	chr11	53567378	53604244	+	NM_008443	kinesin-like protein KIF3A	NP_032469
Itpripl2	1625	chr7:118490161-118490540	379	2.65;4.56	0.00;0.00	inf	0.00582219	0.573379	chr7	118491975	118485111	-	NM_001033380	inositol 1,4,5-trisphosphate receptor-interacting protein-like 2 precursor	NP_001028552
Il11	1811	chr7:4776201-4776460	259	2.65;4.56	0.00;0.00	inf	0.00582219	0.573379	chr7	4778141	4772377	-	NM_008350	interleukin-11 precursor	NP_032376
Golt1a	-302	chr1:133309401-133309640	239	2.65;4.56	0.00;0.00	inf	0.00582219	0.573379	chr1	133309822	133323026	+	NM_026680	vesicle transport protein GOT1A	NP_080956
Gm9897	-1966	chr5:4190281-4190520	239	2.65;4.56	0.00;0.00	inf	0.00582219	0.573379	chr5	4192366	4197651	+	NM_001042670	mitochondrial transcription termination factor-like	NP_001036135
Gm7861	-715	chr8:21595041-21595320	279	2.65;4.56	0.00;0.00	inf	0.00582219	0.573379	chr8	21594465	21593486	-	NM_001177526	predicted gene 7861 precursor	NP_001170997
Gm7849	-715	chr8:21595041-21595320	279	2.65;4.56	0.00;0.00	inf	0.00582219	0.573379	chr8	21594465	21593374	-	NM_001177518	predicted gene, EG665927 precursor	NP_001170989
Gjd3	-294	chr11:98983161-98983460	299	2.65;4.56	0.00;0.00	inf	0.00582219	0.573379	chr11	98983016	98982179	-	NM_178596	gap junction delta-3 protein	NP_848711
Fkbp2	670	chr19:6979581-6979960	379	2.65;4.56	0.00;0.00	inf	0.00582219	0.573379	chr19	6980440	6977738	-	NM_008020	peptidyl-prolyl cis-trans isomerase FKBP2 precursor	NP_032046
Eri1	1003	chr8:35494361-35494700	339	2.65;4.56	0.00;0.00	inf	0.00582219	0.573379	chr8	35495533	35465264	-	NM_026067	3'-5' exoribonuclease 1	NP_080343
Cyp2j9	-635	chr4:96591961-96592280	319	2.65;4.56	0.00;0.00	inf	0.00582219	0.573379	chr4	96591485	96568428	-	NM_028979	cytochrome P450, family 2, subfamily j, polypeptide 9	NP_083255
Cps1	1535	chr1:67124421-67124780	359	2.65;4.56	0.00;0.00	inf	0.00582219	0.573379	chr1	67123065	67230448	+	NM_001080809	carbamoyl-phosphate synthase [ammonia], mitochondrial precursor	NP_001074278
Calcr	-1807	chr6:3766341-3766700	359	2.65;4.56	0.00;0.00	inf	0.00582219	0.573379	chr6	3764713	3685719	-	NM_007588	calcitonin receptor isoform 1b precursor	NP_031614
Afg3l2	1536	chr18:67447501-67447700	199	2.65;4.56	0.00;0.00	inf	0.00582219	0.573379	chr18	67449136	67404763	-	NM_027130	AFG3-like protein 2	NP_081406
Trpm5	2	chr7:143094481-143094800	319	3.54;3.42	0.00;0.00	inf	0.00582219	0.573379	chr7	143094642	143071528	-	NM_020277	transient receptor potential cation channel subfamily M member 5	NP_064673
Tnfsf10	-1106	chr3:27315781-27316160	379	3.54;3.42	0.00;0.00	inf	0.00582219	0.573379	chr3	27317076	27339665	+	NM_009425	tumor necrosis factor ligand superfamily member 10	NP_033451
Tmem217	1173	chr17:29548261-29548580	319	3.54;3.42	0.00;0.00	inf	0.00582219	0.573379	chr17	29549593	29526017	-	NM_001162902	transmembrane protein 217	NP_001156374
Tmem184b	309	chr15:79402421-79402800	379	3.54;3.42	0.00;0.00	inf	0.00582219	0.573379	chr15	79402919	79360683	-	NM_001253817	transmembrane protein 184B isoform 1	NP_001240746
Them5	-228	chr3:94341721-94342020	299	3.54;3.42	0.00;0.00	inf	0.00582219	0.573379	chr3	94342098	94347352	+	NM_025416	acyl-coenzyme A thioesterase THEM5	NP_079692
Slc22a12	-260	chr19:6543201-6543460	259	3.54;3.42	0.00;0.00	inf	0.00582219	0.573379	chr19	6543070	6535855	-	NM_009203	solute carrier family 22 member 12	NP_033229
Rph3a	1258	chr5:121008081-121008440	359	3.54;3.42	0.00;0.00	inf	0.00582219	0.573379	chr5	121009518	120940499	-	NM_011286	rabphilin-3A	NP_035416
Pttg1ip	1674	chr10:77583301-77583580	279	3.54;3.42	0.00;0.00	inf	0.00582219	0.573379	chr10	77581766	77598732	+	NM_145925	pituitary tumor-transforming gene 1 protein-interacting protein precursor	NP_666037
Olfr381	372	chr11:73486261-73486640	379	3.54;3.42	0.00;0.00	inf	0.00582219	0.573379	chr11	73486822	73485886	-	NM_147022	olfactory receptor 381	NP_667233
Olfr32	933	chr2:90141181-90141540	359	3.54;3.42	0.00;0.00	inf	0.00582219	0.573379	chr2	90142293	90138179	-	NM_010980	olfactory receptor 32	NP_035110
Olfr295	-146	chr7:86584941-86585320	379	3.54;3.42	0.00;0.00	inf	0.00582219	0.573379	chr7	86585276	86586206	+	NM_146851	olfactory receptor 295	NP_667062
Nktr	950	chr9:121719941-121720320	379	3.54;3.42	0.00;0.00	inf	0.00582219	0.573379	chr9	121719180	121756841	+	NM_010918	NK-tumor recognition protein	NP_035048
Nans	-1588	chr4:46487581-46487900	319	3.54;3.42	0.00;0.00	inf	0.00582219	0.573379	chr4	46489328	46503438	+	NM_053179	sialic acid synthase	NP_444409
Lbh	-1654	chr17:72916481-72916820	339	3.54;3.42	0.00;0.00	inf	0.00582219	0.573379	chr17	72918304	72941946	+	NM_029999	protein LBH	NP_084275
Ifna4	-1015	chr4:88840621-88840980	359	3.54;3.42	0.00;0.00	inf	0.00582219	0.573379	chr4	88841815	88842459	+	NM_010504	interferon alpha-4 precursor	NP_034634
Grk4	1942	chr5:34662201-34662440	239	3.54;3.42	0.00;0.00	inf	0.00582219	0.573379	chr5	34660378	34701088	+	NM_001080743	G protein-coupled receptor kinase 4 isoform 2	NP_001074212
Gm14474	-1161	chrX:11301141-11301400	259	3.54;3.42	0.00;0.00	inf	0.00582219	0.573379	chrX	11302431	11302921	+	NM_001242947	histone cluster 2 family member	NP_001229876
Fgf17	1218	chr14:70640881-70641220	339	3.54;3.42	0.00;0.00	inf	0.00582219	0.573379	chr14	70642268	70636204	-	NM_008004	fibroblast growth factor 17 precursor	NP_032030
Fam220a	765	chr5:143549301-143549640	339	3.54;3.42	0.00;0.00	inf	0.00582219	0.573379	chr5	143548705	143564525	+	NM_133703	protein FAM220A	NP_598464
Ehd3	-1200	chr17:73803521-73803760	239	3.54;3.42	0.00;0.00	inf	0.00582219	0.573379	chr17	73804840	73832093	+	NM_020578	EH domain-containing protein 3	NP_065603
D4Wsu53e	-1234	chr4:134922241-134922540	299	3.54;3.42	0.00;0.00	inf	0.00582219	0.573379	chr4	134923624	134927370	+	NM_023665	UPF0471 protein C1orf63 homolog	NP_076154
Brf1	1961	chr12:112998541-112998780	239	3.54;3.42	0.00;0.00	inf	0.00582219	0.573379	chr12	113000621	112959861	-	NM_028193	transcription factor IIIB 90 kDa subunit	NP_082469
Abca13	-1091	chr11:9190721-9190980	259	3.54;3.42	0.00;0.00	inf	0.00582219	0.573379	chr11	9191941	9684259	+	NM_178259	ATP-binding cassette sub-family A member 13	NP_839990
Tnfsf12	-612	chr11:69696441-69696980	539	5.31;11.40	0.00;2.60	2.68	0.00593033	0.573379	chr11	69696098	69686239	-	NM_011614	tumor necrosis factor ligand superfamily member 12	NP_035744
BC096441	-612	chr11:69696441-69696980	539	5.31;11.40	0.00;2.60	2.68	0.00593033	0.573379	chr11	69696098	69682576	-	NM_001159503	tumor necrosis factor (ligand) superfamily, member 12-member 13 isoform c	NP_001152975
Vstm5	1106	chr9:15240021-15240280	259	5.31;2.28	0.00;0.00	inf	0.00596689	0.573379	chr9	15239044	15259413	+	NM_026955	V-set and transmembrane domain-containing protein 5 precursor	NP_081231
Tmem41a	-1288	chr16:21948741-21948940	199	5.31;2.28	0.00;0.00	inf	0.00596689	0.573379	chr16	21947552	21934326	-	NM_025693	transmembrane protein 41A precursor	NP_079969
Tmem220	747	chr11:67025741-67026060	319	5.31;2.28	0.00;0.00	inf	0.00596689	0.573379	chr11	67025153	67034790	+	NM_177392	transmembrane protein 220 precursor	NP_796366
Suv39h1	-1130	chrX:8075721-8076060	339	5.31;2.28	0.00;0.00	inf	0.00596689	0.573379	chrX	8074760	8061170	-	NM_011514	histone-lysine N-methyltransferase SUV39H1	NP_035644
Rpl36a	-1253	chrX:134584241-134584560	319	5.31;2.28	0.00;0.00	inf	0.00596689	0.573379	chrX	134585653	134588062	+	NM_019865	60S ribosomal protein L36a	NP_063918
Ranbp9	-1947	chr13:43482821-43483020	199	5.31;2.28	0.00;0.00	inf	0.00596689	0.573379	chr13	43480973	43402672	-	NM_019930	ran-binding protein 9	NP_064314
Pde4b	-1129	chr4:102568781-102569080	299	5.31;2.28	0.00;0.00	inf	0.00596689	0.573379	chr4	102570059	102607262	+	NM_001177980	phosphodiesterase 4B isoform 2	NP_001171451
Pccb	815	chr9:101033941-101034180	239	5.31;2.28	0.00;0.00	inf	0.00596689	0.573379	chr9	101034875	100982037	-	NM_025835	propionyl-CoA carboxylase beta chain, mitochondrial precursor	NP_080111
LOC100861978	-121	chr4:42157821-42158120	299	5.31;2.28	0.00;0.00	inf	0.00596689	0.573379	chr4	42158091	42158846	+	NM_001267704	c-C motif chemokine 27-like isoform 3 precursor	NP_001254633
Gm3750	835	chrX:3442581-3442960	379	5.31;2.28	0.00;0.00	inf	0.00596689	0.573379	chrX	3443605	3442108	-	NM_001099643	uncharacterized protein LOC100042254	NP_001093113
Gm2506	-121	chr4:42157821-42158120	299	5.31;2.28	0.00;0.00	inf	0.00596689	0.573379	chr4	42158091	42158846	+	NM_001199965	chemokine (C-C motif) ligand 27b isoform 2 precursor	NP_001186894
Gm13306	-121	chr4:42157821-42158120	299	5.31;2.28	0.00;0.00	inf	0.00596689	0.573379	chr4	42158091	42158846	+	NM_001164046	chemokine (C-C motif) ligand 27b isoform 2 precursor	NP_001157518
Gja10	1252	chr4:32601021-32601240	219	5.31;2.28	0.00;0.00	inf	0.00596689	0.573379	chr4	32602382	32600864	-	NM_010289	gap junction alpha-10 protein precursor	NP_034419
Cyp2d10	1494	chr15:82405561-82405840	279	5.31;2.28	0.00;0.00	inf	0.00596689	0.573379	chr15	82407194	82402845	-	NM_010005	cytochrome P450 2D10	NP_034135
Cyp2b10	337	chr7:25897841-25898160	319	5.31;2.28	0.00;0.00	inf	0.00596689	0.573379	chr7	25897663	25926624	+	NM_009999	cytochrome P450 2B10 isoform 2 precursor	NP_034129
Cldn18	-1743	chr9:99718861-99719160	299	5.31;2.28	0.00;0.00	inf	0.00596689	0.573379	chr9	99717267	99690796	-	NM_001194923	claudin-18 isoform A2.2	NP_001181852
Ccl27b	-121	chr4:42157821-42158120	299	5.31;2.28	0.00;0.00	inf	0.00596689	0.573379	chr4	42158091	42158846	+	NM_001199959	chemokine (C-C motif) ligand 27b isoform 2 precursor	NP_001186888
Arid4b	1879	chr13:14065481-14065860	379	5.31;2.28	0.00;0.00	inf	0.00596689	0.573379	chr13	14063791	14199603	+	NM_198122	AT-rich interactive domain-containing protein 4B isoform 2	NP_937755
Olfr1510	437	chr14:52410161-52410820	659	4.42;11.40	3.35;0.00	2.24	0.00597395	0.573379	chr14	52410927	52409888	-	NM_146431	olfactory receptor 1510	NP_666642
Trim17	390	chr11:58963981-58964360	379	4.42;9.12	1.12;0.87	2.77	0.00600203	0.573379	chr11	58963780	58971729	+	NM_031172	E3 ubiquitin-protein ligase TRIM17	NP_112449
Phox2a	-1902	chr7:101816141-101816680	539	7.96;12.54	3.35;2.60	1.78	0.0062084	0.573379	chr7	101818312	101822726	+	NM_008887	paired mesoderm homeobox protein 2A	NP_032913
Gucy2e	-188	chr11:69237021-69237400	379	4.42;9.12	0.00;1.73	2.97	0.00624383	0.573379	chr11	69237022	69218116	-	NM_008192	guanylyl cyclase GC-E precursor	NP_032218
Rassf4	1326	chr6:116672141-116672880	739	26.54;19.38	8.93;12.99	1.07	0.00632566	0.573379	chr6	116673836	116633007	-	NM_178045	ras association domain-containing protein 4	NP_835146
Defb13	1249	chr8:21947741-21948280	539	5.31;12.54	3.35;0.87	2.08	0.00636472	0.573379	chr8	21946761	21948622	+	NM_139223	beta-defensin 13 precursor	NP_631969
Aqp5	1473	chr15:99592261-99592740	479	6.19;10.26	3.35;0.87	1.96	0.0063986	0.573379	chr15	99591027	99594829	+	NM_009701	aquaporin-5	NP_033831
Hba-x	971	chr11:32277141-32278000	859	8.85;9.12	1.12;4.33	1.72	0.00640593	0.573379	chr11	32276599	32278115	+	NM_010405	hemoglobin subunit zeta	NP_034535
Ripply1	713	chrX:139781441-139781840	399	8.85;9.12	2.23;3.46	1.66	0.00640593	0.573379	chrX	139782353	139779680	-	NM_001037915	protein ripply1	NP_001033004
Svs5	1116	chr2:164333541-164334220	679	7.96;6.84	1.12;2.60	1.99	0.00649245	0.573379	chr2	164332764	164334394	+	NM_009301	seminal vesicle secretory protein 5 precursor	NP_033327
Npas1	-720	chr7:16477221-16477780	559	7.96;6.84	1.12;2.60	1.99	0.00649245	0.573379	chr7	16476780	16455720	-	NM_008718	neuronal PAS domain-containing protein 1	NP_032744
Unc119	-1871	chr11:78341401-78341900	499	7.96;6.84	2.23;1.73	1.9	0.00649245	0.573379	chr11	78343521	78349156	+	NM_011676	protein unc-119 homolog A	NP_035806
Mab21l2	-1877	chr3:86549961-86550360	399	7.96;6.84	2.23;1.73	1.9	0.00649245	0.573379	chr3	86548283	86545580	-	NM_011839	protein mab-21-like 2	NP_035969
Pid1	-1185	chr1:84285641-84286020	379	7.08;7.98	2.23;1.73	1.92	0.00649246	0.573379	chr1	84284645	84036292	-	NM_001003948	PTB-containing, cubilin and LRP1-interacting protein	NP_001003948
Aqp2	-345	chr15:99578361-99579060	699	19.46;22.80	8.93;11.26	1.07	0.00653071	0.573379	chr15	99579055	99584545	+	NM_009699	aquaporin-2	NP_033829
Rhox4g	1017	chrX:37650121-37650500	379	2.65;7.98	1.12;0.00	3.25	0.00654785	0.573379	chrX	37651327	37646500	-	NM_001039698	reproductive homeobox 4G	NP_001034787
Cda	-1615	chr4:138369381-138369760	379	2.65;7.98	1.12;0.00	3.25	0.00654785	0.573379	chr4	138367955	138338527	-	NM_028176	cytidine deaminase	NP_082452
B230216G23Rik	-400	chr6:142412841-142413220	379	4.42;7.98	2.23;0.00	2.47	0.00657073	0.573379	chr6	142413430	142419740	+	NM_001242345	spexin precursor	NP_001229274
Blmh	-1965	chr11:76943421-76943960	539	9.73;5.70	3.35;0.87	1.87	0.00677215	0.573379	chr11	76945655	76987389	+	NM_178645	bleomycin hydrolase	NP_848760
Ren2	-1995	chr1:133348381-133348760	379	4.42;7.98	1.12;0.87	2.64	0.00681431	0.573379	chr1	133350565	133360323	+	NM_031193	renin-2	NP_112470
Mrap	-913	chr16:90737041-90737780	739	16.81;15.96	4.47;9.53	1.23	0.00688252	0.573379	chr16	90738323	90749776	+	NM_029844	melanocortin-2 receptor accessory protein	NP_084120
Neurl3	-1705	chr1:36274901-36275360	459	9.73;5.70	2.23;1.73	1.96	0.00692685	0.573379	chr1	36273425	36264601	-	NM_153408	E3 ubiquitin-protein ligase NEURL3	NP_700457
Rsg1	-1735	chr4:141211941-141212500	559	4.42;7.98	0.00;1.73	2.84	0.00707364	0.573379	chr4	141213955	141220114	+	NM_001081174	REM2- and Rab-like small GTPase 1	NP_001074643
Rgs9bp	1772	chr7:35583641-35583980	339	4.42;7.98	0.00;1.73	2.84	0.00707364	0.573379	chr7	35585582	35578995	-	NM_145840	regulator of G-protein signaling 9-binding protein	NP_665839
B4galt5	-1882	chr2:167350801-167351320	519	9.73;5.70	1.12;2.60	2.05	0.00708944	0.573379	chr2	167349178	167298444	-	NM_019835	beta-1,4-galactosyltransferase 5	NP_062809
Zscan18	-1052	chr7:12776581-12776840	259	1.77;5.70	0.00;0.00	inf	0.00721469	0.573379	chr7	12775658	12768091	-	NM_001017955	zinc finger and SCAN domain containing 18	NP_001017955
Strip2	1548	chr6:29918401-29918720	319	1.77;5.70	0.00;0.00	inf	0.00721469	0.573379	chr6	29917012	29959680	+	NM_177204	striatin-interacting proteins 2 isoform a	NP_796178
Ptx3	-1306	chr3:66218421-66218740	319	1.77;5.70	0.00;0.00	inf	0.00721469	0.573379	chr3	66219886	66225806	+	NM_008987	pentraxin-related protein PTX3 precursor	NP_033013
Olfr584	151	chr7:103085481-103085860	379	1.77;5.70	0.00;0.00	inf	0.00721469	0.573379	chr7	103085519	103086479	+	NM_147054	olfactory receptor 584	NP_667265
Olfm2	-426	chr9:20728521-20728760	239	1.77;5.70	0.00;0.00	inf	0.00721469	0.573379	chr9	20728214	20667985	-	NM_173777	noelin-2 precursor	NP_776138
Itgb4	-1944	chr11:115972681-115972880	199	1.77;5.70	0.00;0.00	inf	0.00721469	0.573379	chr11	115974724	116008411	+	NM_133663	integrin beta-4 isoform 2 precursor	NP_598424
Gp6	664	chr7:4396961-4397200	239	1.77;5.70	0.00;0.00	inf	0.00721469	0.573379	chr7	4397744	4368712	-	NM_001163014	platelet glycoprotein VI precursor	NP_001156486
Gm5795	720	chr14:3635101-3635420	319	1.77;5.70	0.00;0.00	inf	0.00721469	0.573379	chr14	3634540	3800987	+	NM_001270806	alpha takusan-like	NP_001257735
Ghr	-1583	chr15:3472941-3473200	259	1.77;5.70	0.00;0.00	inf	0.00721469	0.573379	chr15	3471487	3327524	-	NM_001048147	growth hormone receptor isoform 2 precursor	NP_001041612
Fgf14	577	chr14:124676401-124676700	299	1.77;5.70	0.00;0.00	inf	0.00721469	0.573379	chr14	124677127	123978290	-	NM_207667	fibroblast growth factor 14 isoform b	NP_997550
Esrrg	-1225	chr1:187607621-187607940	319	1.77;5.70	0.00;0.00	inf	0.00721469	0.573379	chr1	187609005	188214884	+	NM_001243792	estrogen-related receptor gamma isoform 2	NP_001230721
Dcaf6	1423	chr1:165458861-165459220	359	1.77;5.70	0.00;0.00	inf	0.00721469	0.573379	chr1	165460463	165329500	-	NM_028759	DDB1- and CUL4-associated factor 6	NP_083035
Clp1	-1982	chr2:84729121-84729380	259	1.77;5.70	0.00;0.00	inf	0.00721469	0.573379	chr2	84727268	84723121	-	NM_133840	polyribonucleotide 5'-hydroxyl-kinase Clp1	NP_598601
Ccdc24	-1640	chr4:117873981-117874240	259	1.77;5.70	0.00;0.00	inf	0.00721469	0.573379	chr4	117872470	117869259	-	NM_001034876	coiled-coil domain containing 24	NP_001030048
Bik	-1441	chr15:83525301-83525540	239	1.77;5.70	0.00;0.00	inf	0.00721469	0.573379	chr15	83526861	83544635	+	NM_007546	bcl-2-interacting killer	NP_031572
Adh4	-156	chr3:138415201-138415480	279	1.77;5.70	0.00;0.00	inf	0.00721469	0.573379	chr3	138415496	138430892	+	NM_011996	alcohol dehydrogenase 4	NP_036126
Ablim2	-1829	chr5:35755881-35756220	339	1.77;5.70	0.00;0.00	inf	0.00721469	0.573379	chr5	35757879	35884979	+	NM_001177700	actin-binding LIM protein 2 isoform 6	NP_001171171
Tead1	-153	chr7:112759001-112759460	459	7.96;5.70	1.12;2.60	1.88	0.00724888	0.573379	chr7	112759383	112906805	+	NM_001166585	transcriptional enhancer factor TEF-1 isoform 3	NP_001160057
Slc30a5	-1823	chr13:100835061-100835440	379	7.96;5.70	2.23;1.73	1.78	0.00724888	0.573379	chr13	100833427	100802647	-	NM_022885	zinc transporter 5	NP_075023
Il34	1333	chr8:110804321-110804820	499	7.96;5.70	2.23;1.73	1.78	0.00724888	0.573379	chr8	110805903	110741828	-	NM_029646	interleukin-34 isoform 2 precursor	NP_083922
Gm13298	413	chr4:41966261-41966680	419	7.96;5.70	2.23;1.73	1.78	0.00724888	0.573379	chr4	41966057	41971856	+	NM_001085530	protein FAM205A	NP_001078999
AF067063	757	chr13:119829241-119829680	439	7.96;5.70	2.23;1.73	1.78	0.00724888	0.573379	chr13	119830217	119827960	-	NM_001001449	uncharacterized protein LOC380878	NP_001001449
Gm1587	1318	chr14:77797361-77797940	579	7.08;6.84	1.12;2.60	1.91	0.00724888	0.573379	chr14	77798968	77793944	-	NM_001033440	uncharacterized protein LOC380920	NP_001028612
Il3	1839	chr11:54265201-54265680	479	7.08;6.84	2.23;1.73	1.81	0.00724888	0.573379	chr11	54267279	54265084	-	NM_010556	interleukin-3 precursor	NP_034686
Wdr16	602	chr11:67964921-67965160	239	4.42;2.28	0.00;0.00	inf	0.00761304	0.573379	chr11	67965642	67924805	-	NM_027963	WD repeat-containing protein 16	NP_082239
Tmem25	926	chr9:44798141-44798440	299	4.42;2.28	0.00;0.00	inf	0.00761304	0.573379	chr9	44799216	44793778	-	NM_027865	transmembrane protein 25 precursor	NP_082141
Slc14a2	-498	chr18:78179541-78179800	259	4.42;2.28	0.00;0.00	inf	0.00761304	0.573379	chr18	78179172	78146143	-	NM_001110273	urea transporter 2 isoform c	NP_001103743
Olfr944	1292	chr9:39218481-39218820	339	4.42;2.28	0.00;0.00	inf	0.00761304	0.573379	chr9	39217358	39218294	+	NM_146507	olfactory receptor 944	NP_666718
Npm2	1214	chr14:70651741-70652000	259	4.42;2.28	0.00;0.00	inf	0.00761304	0.573379	chr14	70653084	70647301	-	NM_181345	nucleoplasmin-2	NP_851990
Med15	1460	chr16:17721281-17721660	379	4.42;2.28	0.00;0.00	inf	0.00761304	0.573379	chr16	17722930	17651220	-	NM_001040683	mediator of RNA polymerase II transcription subunit 15 isoform b	NP_001035773
Gsdmc2	126	chr15:63844901-63845200	299	4.42;2.28	0.00;0.00	inf	0.00761304	0.573379	chr15	63845176	63824345	-	NM_177912	gasdermin-C2	NP_808580
Gm6537	1617	chr7:28757661-28757920	259	4.42;2.28	0.00;0.00	inf	0.00761304	0.573379	chr7	28756173	28758964	+	NM_001195091	uncharacterized protein LOC100504112 precursor	NP_001182020
Gars	970	chr6:55038781-55039160	379	4.42;2.28	0.00;0.00	inf	0.00761304	0.573379	chr6	55038000	55079504	+	NM_180678	glycine--tRNA ligase	NP_851009
Fam57b	-864	chr7:126815921-126816120	199	4.42;2.28	0.00;0.00	inf	0.00761304	0.573379	chr7	126816884	126830219	+	NM_026884	protein FAM57B isoform 2	NP_081160
Eya2	1143	chr2:165596041-165596300	259	4.42;2.28	0.00;0.00	inf	0.00761304	0.573379	chr2	165595027	165771727	+	NM_001271963	eyes absent homolog 2	NP_001258892
Dock7	-1995	chr4:99122721-99123100	379	4.42;2.28	0.00;0.00	inf	0.00761304	0.573379	chr4	99120915	98936664	-	NM_026082	dedicator of cytokinesis protein 7	NP_080358
Clasrp	598	chr7:19603681-19604060	379	4.42;2.28	0.00;0.00	inf	0.00761304	0.573379	chr7	19604468	19581042	-	NM_016680	CLK4-associating serine/arginine rich protein isoform L	NP_057889
Cdh23	290	chr10:60696041-60696360	319	4.42;2.28	0.00;0.00	inf	0.00761304	0.573379	chr10	60696490	60302749	-	NM_023370	cadherin-23 isoform 1 precursor	NP_075859
Ccdc116	129	chr16:17143961-17144200	239	4.42;2.28	0.00;0.00	inf	0.00761304	0.573379	chr16	17144209	17139063	-	NM_001164606	coiled-coil domain-containing protein 116	NP_001158078
Bmi1	823	chr2:18677741-18677940	199	4.42;2.28	0.00;0.00	inf	0.00761304	0.573379	chr2	18677017	18686629	+	NM_007552	polycomb complex protein BMI-1	NP_031578
Agpat5	-1088	chr8:18845001-18845380	379	4.42;2.28	0.00;0.00	inf	0.00761304	0.573379	chr8	18846278	18884413	+	NM_026792	1-acyl-sn-glycerol-3-phosphate acyltransferase epsilon	NP_081068
Adat1	1982	chr8:111990141-111990500	359	4.42;2.28	0.00;0.00	inf	0.00761304	0.573379	chr8	111992302	111966907	-	NM_013925	tRNA-specific adenosine deaminase 1	NP_038953
Ido2	-1057	chr8:24577161-24577620	459	12.38;10.26	6.70;2.60	1.28	0.00775044	0.573379	chr8	24576333	24531891	-	NM_145949	indoleamine 2,3-dioxygenase 2	NP_666061
Vstm4	1995	chr14:32858361-32859140	779	11.50;13.68	4.47;5.20	1.38	0.00776622	0.573379	chr14	32856755	32939489	+	NM_178791	V-set and transmembrane domain-containing protein 4 precursor	NP_848906
Pcolce	-1566	chr5:137612841-137613100	259	1.77;9.12	1.12;0.87	2.46	0.00776683	0.573379	chr5	137611404	137605106	-	NM_008788	procollagen C-endopeptidase enhancer 1 precursor	NP_032814
Pvrl4	258	chr1:171370241-171370620	379	7.96;3.42	0.00;0.87	3.72	0.00790315	0.573379	chr1	171370172	171388287	+	NM_001122680	poliovirus receptor-related protein 4 isoform b precursor	NP_001116152
Vpreb3	759	chr10:75948761-75949380	619	27.42;19.38	10.05;12.12	1.08	0.00790379	0.573379	chr10	75948311	75949646	+	NM_009514	pre-B lymphocyte protein 3 precursor	NP_033540
Tbx21	-1739	chr11:97116741-97117400	659	8.85;11.40	3.35;3.46	1.57	0.00791043	0.573379	chr11	97115331	97098006	-	NM_019507	T-box transcription factor TBX21	NP_062380
Lpin3	1073	chr2:160888801-160889680	879	15.92;12.54	5.58;6.93	1.19	0.00796059	0.573379	chr2	160888167	160906000	+	NM_001199118	phosphatidate phosphatase LPIN3	NP_001186047
BC055111	-1952	chr4:106618741-106619640	899	15.92;12.54	7.82;5.20	1.13	0.00796059	0.573379	chr4	106617238	106590908	-	NM_183182	uncharacterized protein C1orf177 homolog	NP_899005
Trim65	1348	chr11:116129521-116130040	519	7.08;19.38	5.58;3.46	1.55	0.00805917	0.573379	chr11	116131128	116124707	-	NM_178802	tripartite motif-containing protein 65	NP_848917
Vmn1r217	90	chr13:23114461-23114820	359	6.19;3.42	0.00;0.87	3.47	0.00822124	0.573379	chr13	23114730	23113833	-	NM_134239	vomeronasal 1 receptor 217	NP_599000
Cyp2a5	242	chr7:26835401-26835760	359	6.19;3.42	0.00;0.87	3.47	0.00822124	0.573379	chr7	26835338	26843264	+	NM_007812	cytochrome P450 2A5	NP_031838
Abcg3	-1153	chr5:104983441-104984300	859	10.61;17.10	5.58;4.33	1.48	0.00826328	0.573379	chr5	104982717	104935056	-	NM_030239	ATP-binding cassette sub-family G member 3	NP_084515
Olfr601	683	chr7:103358221-103358840	619	16.81;13.68	4.47;8.66	1.22	0.00838993	0.573379	chr7	103359213	103358223	-	NM_146314	olfactory receptor 601	NP_666426
Itpripl1	1550	chr2:127140761-127141320	559	15.92;14.82	7.82;6.06	1.15	0.00838993	0.573379	chr2	127142590	127138768	-	NM_001163528	inositol 1,4,5-trisphosphate receptor-interacting protein-like 1 precursor	NP_001157000
Vmn1r94	1587	chr7:20166601-20166980	379	5.31;4.56	0.00;1.73	2.51	0.00845198	0.573379	chr7	20168377	20167459	-	NM_001166723	vomeronasal 1 receptor 94	NP_001160195
Vmn1r142	1587	chr7:20166601-20166980	379	5.31;4.56	0.00;1.73	2.51	0.00845198	0.573379	chr7	20168377	20167459	-	NM_001166749	vomeronasal 1 receptor 142	NP_001160221
Bst2	1287	chr8:71535861-71536440	579	5.31;4.56	0.00;1.73	2.51	0.00845198	0.573379	chr8	71537437	71534261	-	NM_198095	bone marrow stromal antigen 2 precursor	NP_932763
Arntl2	101	chr6:146805441-146805820	379	5.31;4.56	0.00;1.73	2.51	0.00845198	0.573379	chr6	146805529	146832646	+	NM_172309	aryl hydrocarbon receptor nuclear translocator-like protein 2	NP_758513
Olfr1202	898	chr2:88817761-88818380	619	4.42;5.70	0.00;1.73	2.55	0.00845198	0.573379	chr2	88817172	88818102	+	NM_146462	olfactory receptor 1202	NP_666673
Ccs	1992	chr19:4837101-4837560	459	4.42;5.70	0.00;1.73	2.55	0.00845198	0.573379	chr19	4839322	4825365	-	NM_016892	copper chaperone for superoxide dismutase	NP_058588
Tma16	-1963	chr8:66488321-66488620	299	5.31;4.56	1.12;0.87	2.31	0.00845198	0.573379	chr8	66486507	66476345	-	NM_025465	translation machinery-associated protein 16	NP_079741
Shd	-1111	chr17:55969241-55969500	259	5.31;4.56	1.12;0.87	2.31	0.00845198	0.573379	chr17	55970481	55976619	+	NM_009168	SH2 domain-containing adapter protein D isoform 2	NP_033194
As3mt	-1912	chr19:46705341-46705720	379	5.31;4.56	1.12;0.87	2.31	0.00845198	0.573379	chr19	46707442	46741095	+	NM_020577	arsenite methyltransferase	NP_065602
Fbxw20	1104	chr9:109233361-109233940	579	4.42;5.70	1.12;0.87	2.35	0.00845198	0.573379	chr9	109234754	109217431	-	NM_001008428	F-box and WD-40 domain protein 20	NP_001008428
Asb16	1108	chr11:102269741-102270120	379	4.42;5.70	1.12;0.87	2.35	0.00845198	0.573379	chr11	102268822	102278061	+	NM_148953	ankyrin repeat and SOCS box protein 16	NP_683755
Slc16a1	1253	chr3:104639741-104640100	359	5.31;4.56	2.23;0.00	2.14	0.00845198	0.573379	chr3	104638667	104658462	+	NM_009196	monocarboxylate transporter 1	NP_033222
Mup1	-1390	chr4:60503161-60503540	379	5.31;4.56	2.23;0.00	2.14	0.00845198	0.573379	chr4	60501960	60498933	-	NM_001163010	major urinary protein 1 isoform b precursor	NP_001156482
Il1r2	-417	chr1:40084161-40084540	379	5.31;4.56	2.23;0.00	2.14	0.00845198	0.573379	chr1	40084767	40125226	+	NM_010555	interleukin-1 receptor type 2 precursor	NP_034685
BB287469	-1367	chr12:87617341-87617660	319	5.31;4.56	2.23;0.00	2.14	0.00845198	0.573379	chr12	87618867	87622955	+	NM_001177573	eukaryotic translation initiation factor 1A-like 3	NP_001171044
2210404J11Rik	1172	chr17:15054041-15054420	379	5.31;4.56	2.23;0.00	2.14	0.00845198	0.573379	chr17	15053058	15064232	+	NM_001034891	uncharacterized protein LOC381062 isoform 2	NP_001030063
Tmed9	-1234	chr13:55591681-55592120	439	4.42;5.70	2.23;0.00	2.18	0.00845198	0.573379	chr13	55593134	55597694	+	NM_026211	transmembrane emp24 domain-containing protein 9 precursor	NP_080487
Gm15881	526	chr8:58700081-58700460	379	4.42;5.70	2.23;0.00	2.18	0.00845198	0.573379	chr8	58700796	58699845	-	NM_001177534	uncharacterized protein LOC100271928	NP_001171005
Adck4	1258	chr7:27234021-27234520	499	4.42;5.70	2.23;0.00	2.18	0.00845198	0.573379	chr7	27233012	27257949	+	NM_133770	uncharacterized aarF domain-containing protein kinase 4	NP_598531
Cecr6	-1813	chr6:120495401-120495840	439	13.27;9.12	2.23;6.06	1.43	0.00847971	0.573379	chr6	120493807	120488938	-	NM_033567	cat eye syndrome critical region protein 6 homolog	NP_291045
Tmc5	305	chr7:118633741-118634340	599	6.19;4.56	0.00;1.73	2.63	0.00861166	0.573379	chr7	118633735	118675085	+	NM_028930	transmembrane channel-like protein 5 isoform b	NP_083206
Creld1	12	chr6:113483321-113483840	519	6.19;4.56	0.00;1.73	2.63	0.00861166	0.573379	chr6	113483568	113493338	+	NM_133930	cysteine-rich with EGF-like domain protein 1 precursor	NP_598691
Lypd5	-83	chr7:24348881-24349400	519	6.19;4.56	1.12;0.87	2.44	0.00861166	0.573379	chr7	24349223	24353833	+	NM_029806	ly6/PLAUR domain-containing protein 5 precursor	NP_084082
Gm14499	-450	chrX:9042901-9043300	399	6.19;4.56	1.12;0.87	2.44	0.00861166	0.573379	chrX	9043550	9044410	+	NM_001277184	ferritin, heavy polypeptide-like 17 like 4	NP_001264113
Foxs1	1128	chr2:152931921-152932240	319	6.19;4.56	1.12;0.87	2.44	0.00861166	0.573379	chr2	152933208	152931897	-	NM_010226	forkhead box protein S1	NP_034356
Pifo	-123	chr3:106001421-106001820	399	5.31;5.70	1.12;0.87	2.47	0.00861166	0.573379	chr3	106001497	105996956	-	NM_029604	protein pitchfork isoform b	NP_083880
Fbln1	-1007	chr15:85204721-85205280	559	5.31;5.70	1.12;0.87	2.47	0.00861166	0.573379	chr15	85206007	85286294	+	NM_010180	fibulin-1 precursor	NP_034310
Thbs1	449	chr2:118112161-118112580	419	5.31;5.70	0.00;1.73	2.67	0.00861166	0.573379	chr2	118111921	118127133	+	NM_011580	thrombospondin-1 precursor	NP_035710
Ppyr1	-1901	chr14:34154041-34154600	559	5.31;5.70	0.00;1.73	2.67	0.00861166	0.573379	chr14	34152419	34145645	-	NM_008919	neuropeptide Y receptor type 4	NP_032945
Got1	-1095	chr19:43525421-43525980	559	5.31;5.70	0.00;1.73	2.67	0.00861166	0.573379	chr19	43524605	43499752	-	NM_010324	aspartate aminotransferase, cytoplasmic	NP_034454
Fut4	1372	chr9:14750501-14751000	499	5.31;5.70	0.00;1.73	2.67	0.00861166	0.573379	chr9	14752122	14748458	-	NM_010242	alpha-(1,3)-fucosyltransferase	NP_034372
Rai14	390	chr15:10713001-10713300	299	4.42;6.84	0.00;1.73	2.7	0.00861166	0.573379	chr15	10713540	10568977	-	NM_030690	ankycorbin	NP_109615
Igf1	680	chr10:87861581-87862000	419	4.42;6.84	0.00;1.73	2.7	0.00861166	0.573379	chr10	87861110	87915770	+	NM_184052	insulin-like growth factor I isoform 2 preproprotein	NP_908941
Dcc	-1491	chr18:72352421-72352700	279	4.42;6.84	1.12;0.87	2.51	0.00861166	0.573379	chr18	72351069	71253631	-	NM_007831	netrin receptor DCC precursor	NP_031857
5031414D18Rik	1474	chr14:75017301-75017700	399	5.31;5.70	2.23;0.00	2.3	0.00861166	0.573379	chr14	75016026	75052532	+	NM_198642	uncharacterized protein KIAA0226-like	NP_941044
Taf13	792	chr3:108572201-108572780	579	4.42;6.84	2.23;0.00	2.33	0.00861166	0.573379	chr3	108571698	108582068	+	NM_025444	transcription initiation factor TFIID subunit 13	NP_079720
Gm3500	-1466	chr14:5390401-5390680	279	1.77;9.12	0.00;1.73	2.65	0.00865339	0.573379	chr14	5389074	5365791	-	NM_001256886	predicted gene 3468	NP_001243815
Abcc3	-1074	chr11:94393821-94394280	459	7.96;4.56	2.23;0.87	2.01	0.0086617	0.573379	chr11	94392976	94343294	-	NM_029600	canalicular multispecific organic anion transporter 2	NP_083876
S1pr4	-1033	chr10:81500981-81501360	379	8.85;10.26	0.00;4.33	2.14	0.00868251	0.573379	chr10	81500137	81497744	-	NM_010102	sphingosine 1-phosphate receptor 4	NP_034232
Serpina3a	-863	chr12:104111721-104112000	279	1.77;10.26	2.23;0.87	1.96	0.00869386	0.573379	chr12	104112723	104121896	+	NM_001167705	serine protease inhibitor A3A precursor	NP_001161177
Gng7	565	chr10:81014041-81014680	639	12.38;17.10	4.47;7.79	1.27	0.00876976	0.573379	chr10	81014925	80948623	-	NM_010319	guanine nucleotide-binding protein G(I)/G(S)/G(O) subunit gamma-7	NP_034449
Chchd7	1397	chr4:3940061-3940560	499	5.31;17.10	4.47;2.60	1.66	0.00882692	0.573379	chr4	3938913	3943525	+	NM_181391	coiled-coil-helix-coiled-coil-helix domain-containing protein 7	NP_852056
Nav2	1182	chr7:49247181-49247560	379	9.73;2.28	2.23;0.00	2.43	0.00889282	0.573379	chr7	49246188	49610088	+	NM_175272	neuron navigator 2 isoform 1	NP_780481
Il13ra1	992	chrX:36112781-36113480	699	12.38;11.40	5.58;4.33	1.26	0.00892973	0.573379	chrX	36112138	36171261	+	NM_133990	interleukin-13 receptor subunit alpha-1 precursor	NP_598751
Vgll3	1188	chr16:65816601-65817040	439	7.96;4.56	1.12;1.73	2.14	0.00894683	0.573379	chr16	65815632	65863066	+	NM_028572	transcription cofactor vestigial-like protein 3	NP_082848
Slc22a20	-167	chr19:5986041-5986580	539	7.96;4.56	1.12;1.73	2.14	0.00894683	0.573379	chr19	5986143	5970233	-	NM_198650	solute carrier family 22 member 20	NP_941052
Klhl26	-507	chr8:70477101-70477800	699	7.96;11.40	3.35;3.46	1.51	0.00907296	0.573379	chr8	70476943	70450227	-	NM_001122830	kelch-like protein 26 isoform 3	NP_001116302
Gcnt1	-1485	chr19:17340701-17341280	579	5.31;9.12	1.12;1.73	2.34	0.0090797	0.573379	chr19	17339505	17326140	-	NM_001136484	beta-1,3-galactosyl-O-glycosyl-glycoprotein beta-1,6-N-acetylglucosaminyltransferase	NP_001129956
Rbms3	-1057	chr9:117630781-117631160	379	13.27;4.56	1.12;2.60	2.26	0.00910333	0.573379	chr9	117629913	116572746	-	NM_001172121	RNA-binding motif, single-stranded-interacting protein 3 isoform 4	NP_001165592
Rem2	491	chr14:54476401-54476780	379	3.54;10.26	1.12;1.73	2.28	0.00938548	0.573379	chr14	54476099	54480434	+	NM_080726	GTP-binding protein REM 2	NP_542764
Cacna1h	1413	chr17:25432181-25432560	379	3.54;9.12	0.00;1.73	2.87	0.00940553	0.573379	chr17	25433783	25374286	-	NM_001163691	voltage-dependent T-type calcium channel subunit alpha-1H isoform 2	NP_001157163
Awat2	602	chrX:100411781-100412140	359	3.54;9.12	0.00;1.73	2.87	0.00940553	0.573379	chrX	100412562	100402221	-	NM_177746	acyl-CoA wax alcohol acyltransferase 2	NP_808414
Krt12	599	chr11:99421381-99421940	559	10.61;6.84	1.12;4.33	1.68	0.00950781	0.573379	chr11	99422259	99415663	-	NM_010661	keratin, type I cytoskeletal 12	NP_034791
1810062G17Rik	564	chr3:36476181-36476820	639	16.81;12.54	4.47;8.66	1.16	0.00962728	0.573379	chr3	36475936	36482299	+	NM_028183	uncharacterized protein LOC72282	NP_082459
Stoml3	-202	chr3:53488421-53488760	339	5.31;3.42	1.12;0.00	2.97	0.0096525	0.573379	chr3	53488792	53507652	+	NM_153156	stomatin-like protein 3	NP_694796
Lcn9	208	chr2:25823201-25823520	319	5.31;3.42	1.12;0.00	2.97	0.0096525	0.573379	chr2	25823152	25825537	+	NM_029959	epididymal-specific lipocalin-9 precursor	NP_084235
Hpse	-1667	chr5:100721161-100721540	379	5.31;3.42	1.12;0.00	2.97	0.0096525	0.573379	chr5	100719683	100679485	-	NM_152803	heparanase precursor	NP_690016
Hoxd11	-952	chr2:74681181-74681560	379	5.31;3.42	1.12;0.00	2.97	0.0096525	0.573379	chr2	74682322	74687016	+	NM_008273	homeobox protein Hox-D11	NP_032299
Ropn1	1200	chr16:34652221-34652600	379	4.42;4.56	0.00;0.87	3.37	0.0096525	0.573379	chr16	34651210	34678610	+	NM_030744	ropporin-1	NP_109669
Pdha2	1685	chr3:141210501-141210840	339	4.42;4.56	0.00;0.87	3.37	0.0096525	0.573379	chr3	141212355	141210003	-	NM_008811	pyruvate dehydrogenase E1 component subunit alpha, testis-specific form, mitochondrial precursor	NP_032837
Olfr1513	934	chr14:52348901-52349320	419	4.42;4.56	0.00;0.87	3.37	0.0096525	0.573379	chr14	52350044	52349102	-	NM_001012269	olfactory receptor 1513	NP_001012269
Ndufs8	1944	chr19:3910661-3911000	339	4.42;4.56	0.00;0.87	3.37	0.0096525	0.573379	chr19	3912774	3908862	-	NM_144870	NADH dehydrogenase [ubiquinone] iron-sulfur protein 8, mitochondrial	NP_659119
Gm5803	474	chr15:22714341-22714680	339	4.42;4.56	0.00;0.87	3.37	0.0096525	0.573379	chr15	22714984	22713819	-	NM_001165971	predicted gene 5803	NP_001159443
C1qa	-1766	chr4:136900421-136900800	379	4.42;4.56	0.00;0.87	3.37	0.0096525	0.573379	chr4	136898844	136895915	-	NM_007572	complement C1q subcomponent subunit A precursor	NP_031598
Bcl2l15	-1525	chr3:103830981-103831360	379	4.42;4.56	0.00;0.87	3.37	0.0096525	0.573379	chr3	103832695	103838648	+	NM_001142959	bcl-2-like protein 15 isoform 1	NP_001136431
Ramp3	-1202	chr11:6657181-6657480	299	5.31;3.42	0.00;0.87	3.33	0.0096525	0.573379	chr11	6658532	6677475	+	NM_019511	receptor activity-modifying protein 3 precursor	NP_062384
Pou5f2	309	chr13:78025021-78025400	379	5.31;3.42	0.00;0.87	3.33	0.0096525	0.573379	chr13	78024901	78026296	+	NM_029315	POU domain, class 5, transcription factor 2	NP_083591
Gm13547	-1197	chr2:29760141-29760520	379	5.31;3.42	0.00;0.87	3.33	0.0096525	0.573379	chr2	29761527	29764089	+	NM_001177392	uncharacterized protein LOC433416	NP_001170863
Nkx6-2	-653	chr7:139583301-139583600	299	4.42;4.56	1.12;0.00	3.01	0.0096525	0.573379	chr7	139582797	139581219	-	NM_183248	NK6 transcription factor related, locus 2	NP_899071
Gsk3b	-410	chr16:38088401-38088780	379	4.42;4.56	1.12;0.00	3.01	0.0096525	0.573379	chr16	38089000	38246079	+	NM_019827	glycogen synthase kinase-3 beta	NP_062801
Gm11992	-491	chr11:9047901-9048300	399	4.42;4.56	1.12;0.00	3.01	0.0096525	0.573379	chr11	9048591	9069354	+	NM_001037928	uncharacterized protein C7orf57 homolog	NP_001033017
Gdf15	-215	chr8:70631641-70632060	419	4.42;4.56	1.12;0.00	3.01	0.0096525	0.573379	chr8	70631635	70629393	-	NM_011819	growth/differentiation factor 15 precursor	NP_035949
Slc6a3	414	chr13:73536981-73537340	359	3.54;5.70	0.00;0.87	3.41	0.0096525	0.573379	chr13	73536746	73578672	+	NM_010020	sodium-dependent dopamine transporter	NP_034150
Gins4	-262	chr8:23237741-23238120	379	3.54;5.70	0.00;0.87	3.41	0.0096525	0.573379	chr8	23237668	23226609	-	NM_024240	DNA replication complex GINS protein SLD5	NP_077202
Fam114a2	304	chr11:57518161-57518520	359	3.54;5.70	0.00;0.87	3.41	0.0096525	0.573379	chr11	57518644	57482989	-	NM_026342	protein FAM114A2 isoform 2	NP_080618
Eva1c	102	chr16:90830821-90831100	279	3.54;5.70	0.00;0.87	3.41	0.0096525	0.573379	chr16	90830858	90904885	+	NM_027627	protein eva-1 homolog C isoform 2	NP_081903
Clrn2	100	chr5:45453681-45454020	339	3.54;5.70	0.00;0.87	3.41	0.0096525	0.573379	chr5	45453750	45464149	+	NM_001163317	clarin 2	NP_001156789
Ccrl1	-1737	chr9:104128161-104128600	439	3.54;5.70	0.00;0.87	3.41	0.0096525	0.573379	chr9	104126643	104098137	-	NM_145700	C-C chemokine receptor type 11	NP_663746
Wfdc12	-872	chr2:164191221-164191640	419	3.54;5.70	1.12;0.00	3.05	0.0096525	0.573379	chr2	164190558	164189230	-	NM_138684	WAP four-disulfide core domain protein 12 precursor	NP_619625
Wdr24	1804	chr17:25825261-25825600	339	3.54;5.70	1.12;0.00	3.05	0.0096525	0.573379	chr17	25823626	25828730	+	NM_173741	WD repeat-containing protein 24	NP_776102
Sdad1	1774	chr5:92308041-92308460	419	3.54;5.70	1.12;0.00	3.05	0.0096525	0.573379	chr5	92310024	92284009	-	NM_172713	protein SDA1 homolog	NP_766301
Nphs2	-1474	chr1:156309061-156309460	399	3.54;5.70	1.12;0.00	3.05	0.0096525	0.573379	chr1	156310734	156328035	+	NM_130456	podocin	NP_569723
Lig1	86	chr7:13279161-13279540	379	3.54;5.70	1.12;0.00	3.05	0.0096525	0.573379	chr7	13279264	13311427	+	NM_001083188	DNA ligase 1	NP_001076657
Il1r1	-1189	chr1:40223701-40224080	379	8.85;3.42	2.23;0.00	2.46	0.00978254	0.573379	chr1	40225079	40316177	+	NM_008362	interleukin-1 receptor type 1 isoform 1 precursor	NP_032388
Plin3	671	chr17:56289661-56290020	359	3.54;6.84	0.00;0.87	3.58	0.00983042	0.573379	chr17	56290511	56278961	-	NM_025836	perilipin-3	NP_080112
Olfr95	-1699	chr17:37213401-37213700	299	3.54;6.84	0.00;0.87	3.58	0.00983042	0.573379	chr17	37211851	37210912	-	NM_146513	olfactory receptor 95	NP_666724
Krt76	490	chr15:101892201-101892660	459	3.54;6.84	0.00;0.87	3.58	0.00983042	0.573379	chr15	101892920	101884350	-	NM_001033177	keratin, type II cytoskeletal 2 oral	NP_001028349
Ccdc142	-1565	chr6:83099821-83100080	259	3.54;6.84	0.00;0.87	3.58	0.00983042	0.573379	chr6	83101515	83109121	+	NM_001081266	coiled-coil domain-containing protein 142	NP_001074735
Morc2b	-1007	chr17:33140421-33140960	539	7.96;7.98	2.23;2.60	1.72	0.00990437	0.573379	chr17	33139683	33135589	-	NM_177719	MORC family CW-type zinc finger protein 2B	NP_808387
Ghrh	-1505	chr2:157347981-157348340	359	3.54;11.40	3.35;0.87	1.82	0.00993831	0.573379	chr2	157346655	157329495	-	NM_010285	somatoliberin precursor	NP_034415
